# Supplementary material for: Effectiveness of Immune Checkpoint Inhibitors in Patients With Advanced Esophageal Squamous Cell Carcinoma: A Meta-analysis Including Low PD-L1 Subgroups
Source: PubMed Central journal article supplement (PMC9857522; doi:10.1001/jamaoncol.2022.5816), 2022-12-08
Supplement: jamaoncol-e225816-s001.pdf [file jamaoncol-e225816-s001.pdf]

## Supplementary Online Content

Yap DWT, Leone AG, Wong NZH, et al. Efficacy of immune checkpoint inhibitors in patients with advanced esophageal squamous cell carcinoma: a meta-analysis including low PD-L1 subgroups. *JAMA Oncol*. Published online December 8, 2022.  
doi:10.1001/jamaoncol.2022.5816

**eTable 1.** Search Information

**eTable 2.** Search Information and Where KMSubtraction Was Implemented

**eFigure 1.** PRISMA Diagram

**eFigure 2.** Risk-of-Bias Assessment

**eFigure 3.** Comparisons to Original Curves for Overall and PD-L1–High Subgroups

**eFigure 4.** Example Comparisons of KMSubtraction Outcomes With Reported HRs for PD-L1–Low Subgroups

**eFigure 5.** Evaluation of KMSubtraction Bipartite Matching

**eFigure 6.** Convergence Plots and Histograms of Simulations

**eFigure 7.** One-Stage Pooled Analysis of First-line and Second-line Studies

This supplementary material has been provided by the authors to give readers additional information about their work.

**eTable 1. Search Information**

|                               |                                                                                                                                                                                                                                                                                                                                                                                                                                                                                                                                                                                                                                                                                                                                                                                                                                                                                                                                                                                                                                                                                                                                                                                                                                                                                                                                                                                                                                                                                                                                                                                                                                                                                                                                                                                                                                                                                                                                                                                                                                                                                                                                                                                                                                                                                                                                                                                                                                                                                                                                                                                                                                                                                                                                                                                                                                                                                                                                                                                                                                                                                                                                                                                                                                                                                                                                                                                                                                                                                                                                                         |
|-------------------------------|---------------------------------------------------------------------------------------------------------------------------------------------------------------------------------------------------------------------------------------------------------------------------------------------------------------------------------------------------------------------------------------------------------------------------------------------------------------------------------------------------------------------------------------------------------------------------------------------------------------------------------------------------------------------------------------------------------------------------------------------------------------------------------------------------------------------------------------------------------------------------------------------------------------------------------------------------------------------------------------------------------------------------------------------------------------------------------------------------------------------------------------------------------------------------------------------------------------------------------------------------------------------------------------------------------------------------------------------------------------------------------------------------------------------------------------------------------------------------------------------------------------------------------------------------------------------------------------------------------------------------------------------------------------------------------------------------------------------------------------------------------------------------------------------------------------------------------------------------------------------------------------------------------------------------------------------------------------------------------------------------------------------------------------------------------------------------------------------------------------------------------------------------------------------------------------------------------------------------------------------------------------------------------------------------------------------------------------------------------------------------------------------------------------------------------------------------------------------------------------------------------------------------------------------------------------------------------------------------------------------------------------------------------------------------------------------------------------------------------------------------------------------------------------------------------------------------------------------------------------------------------------------------------------------------------------------------------------------------------------------------------------------------------------------------------------------------------------------------------------------------------------------------------------------------------------------------------------------------------------------------------------------------------------------------------------------------------------------------------------------------------------------------------------------------------------------------------------------------------------------------------------------------------------------------------|
| <b>Date of search</b>         | 1 October 2021                                                                                                                                                                                                                                                                                                                                                                                                                                                                                                                                                                                                                                                                                                                                                                                                                                                                                                                                                                                                                                                                                                                                                                                                                                                                                                                                                                                                                                                                                                                                                                                                                                                                                                                                                                                                                                                                                                                                                                                                                                                                                                                                                                                                                                                                                                                                                                                                                                                                                                                                                                                                                                                                                                                                                                                                                                                                                                                                                                                                                                                                                                                                                                                                                                                                                                                                                                                                                                                                                                                                          |
| <b>Databases</b>              | PubMed, Web of Science, Scopus, Embase, American Society of Clinical Oncology Meeting Library                                                                                                                                                                                                                                                                                                                                                                                                                                                                                                                                                                                                                                                                                                                                                                                                                                                                                                                                                                                                                                                                                                                                                                                                                                                                                                                                                                                                                                                                                                                                                                                                                                                                                                                                                                                                                                                                                                                                                                                                                                                                                                                                                                                                                                                                                                                                                                                                                                                                                                                                                                                                                                                                                                                                                                                                                                                                                                                                                                                                                                                                                                                                                                                                                                                                                                                                                                                                                                                           |
| <b>Search string</b>          | (gastric OR stomach OR esophageal OR gastroesophageal OR gastro-oesophageal OR gastro-esophageal) AND (checkpoint inhibitors OR ICI OR pembrolizumab OR ipilimumab OR nivolumab OR avelumab OR camrelizumab OR durvalumab OR sintilimab OR programmed death ligand OR "PD-L1" OR "PD-1" OR immunotherapy) AND (random* AND trial)                                                                                                                                                                                                                                                                                                                                                                                                                                                                                                                                                                                                                                                                                                                                                                                                                                                                                                                                                                                                                                                                                                                                                                                                                                                                                                                                                                                                                                                                                                                                                                                                                                                                                                                                                                                                                                                                                                                                                                                                                                                                                                                                                                                                                                                                                                                                                                                                                                                                                                                                                                                                                                                                                                                                                                                                                                                                                                                                                                                                                                                                                                                                                                                                                       |
| <b>Search string exploded</b> | ("gastrics"[All Fields] OR "stomach"[MeSH Terms] OR "stomach"[All Fields] OR "gastric"[All Fields] OR ("stomach"[MeSH Terms] OR "stomach"[All Fields] OR "stomachs"[All Fields] OR "stomach s"[All Fields] OR "stomachal"[All Fields] OR "stomaches"[All Fields]) OR ("esophageal"[All Fields] OR "esophagic"[All Fields] OR "esophagitis"[MeSH Terms] OR "esophagitis"[All Fields] OR "esophagitides"[All Fields] OR "oesophagal"[All Fields] OR "oesophageal"[All Fields] OR "oesophagic"[All Fields] OR "oesophagitis"[All Fields]) OR ("gastro esophageal"[All Fields] OR "gastro oesophageal"[All Fields] OR "gastro oesophagitis"[All Fields] OR "gastroesophagal"[All Fields] OR "gastroesophageal"[All Fields] OR "gastroesophagic"[All Fields] OR "gastroesophagitis"[All Fields] OR "gastroesophageal"[All Fields] OR "gastroesophagal"[All Fields] OR "gastroesophageal"[All Fields] OR "gastroesophagitis"[All Fields] OR "gastroesophageal"[All Fields] OR "gastro esophageal"[All Fields] OR "gastro oesophageal"[All Fields] OR "gastro oesophagitis"[All Fields] OR "gastroesophagal"[All Fields] OR "gastroesophageal"[All Fields] OR "gastroesophagic"[All Fields] OR "gastroesophagitis"[All Fields]) AND (((("cell cycle checkpoints"[MeSH Terms] OR ("cell"[All Fields] AND "cycle"[All Fields] AND "checkpoints"[All Fields]) OR "cell cycle checkpoints"[All Fields] OR "checkpoint"[All Fields] OR "checkpoints"[All Fields]) AND ("antagonists and inhibitors"[MeSH Subheading] OR ("antagonists"[All Fields] AND "inhibitors"[All Fields]) OR "antagonists and inhibitors"[All Fields] OR "inhibitors"[All Fields] OR "inhibitor"[All Fields] OR "inhibitor s"[All Fields])) OR "ICI"[All Fields] OR ("pembrolizumab"[Supplementary Concept] OR "pembrolizumab"[All Fields]) OR ("ipilimumab"[MeSH Terms] OR "ipilimumab"[All Fields]) OR ("nivolumab"[MeSH Terms] OR "nivolumab"[All Fields] OR "nivolumab s"[All Fields]) OR ("avelumab"[Supplementary Concept] OR "avelumab"[All Fields]) OR ("camrelizumab"[Supplementary Concept] OR "camrelizumab"[All Fields]) OR ("durvalumab"[Supplementary Concept] OR "durvalumab"[All Fields]) OR ("sintilimab"[Supplementary Concept] OR "sintilimab"[All Fields]) OR (("program"[All Fields] OR "program s"[All Fields] OR "programe"[All Fields] OR "programed"[All Fields] OR "programes"[All Fields] OR "programing"[All Fields] OR "programmability"[All Fields] OR "programmable"[All Fields] OR "programmably"[All Fields] OR "programme"[All Fields] OR "programme s"[All Fields] OR "programmed"[All Fields] OR "programmer"[All Fields] OR "programmer s"[All Fields] OR "programmers"[All Fields] OR "programmes"[All Fields] OR "programming"[All Fields] OR "programmings"[All Fields] OR "programs"[All Fields]) AND ("death"[MeSH Terms] OR "death"[All Fields] OR "deaths"[All Fields]) AND ("ligand s"[All Fields] OR "liganded"[All Fields] OR "liganding"[All Fields] OR "ligands"[MeSH Terms] OR "ligands"[All Fields] OR "ligand"[All Fields])) OR "PD-L1"[All Fields] OR "PD-1"[All Fields] OR ("immunotherapy"[MeSH Terms] OR "immunotherapy"[All Fields] OR "immunotherapies"[All Fields] OR "immunotherapy s"[All Fields])) AND ("random*" [All Fields] AND ("clinical trials as topic"[MeSH Terms] OR ("clinical"[All Fields] AND "trials"[All Fields] AND "topic"[All Fields]) OR "clinical trials as topic"[All Fields] OR "trial"[All Fields] OR "trial s"[All Fields] OR "trialed"[All Fields] OR "trialing"[All Fields] OR "trials"[All Fields])) |

**eTable 2. Search Information and Where KMSubtraction Was Implemented**

| Trial,                                                | PD-L1 assay and reporting method                                                                                                                                                                                                                                                                            | Comparison        | Outcome | Histology | “Overall” curve | “Subgroup” High PD-L1 expressing curve | Did the original publication report the low PD-L1 KM curve? | Did the original publication report the low PD-L1 Hazard ratio? | PD-L1 low curves derived by KMSubtraction: i.e. “Subtracting” “Subgroup” curve from “overall” curve |
|-------------------------------------------------------|-------------------------------------------------------------------------------------------------------------------------------------------------------------------------------------------------------------------------------------------------------------------------------------------------------------|-------------------|---------|-----------|-----------------|----------------------------------------|-------------------------------------------------------------|-----------------------------------------------------------------|-----------------------------------------------------------------------------------------------------|
| <b>ATTRACTION-3</b><br>Kato, 2019<br>NCT02569242      | TPS $\geq 1$ :Positive for PD-L1 when cancerous cells with stained cell membranes account for $\geq 1\%$ of at least 100 evaluable cancerous cells<br><br>IHC 28-8 pharmDx assay (Dako, Santa Clara, CA, USA)                                                                                               | Nivo/Chemo        | OS      | ESCC      | Overall         | PD-L1 TPS $\geq 1$                     | Yes                                                         | Yes                                                             | NIL as originally reported in manuscript                                                            |
| <b>CheckMate-648</b><br>Yuichiro, 2022<br>NCT03143153 | TPS $\geq 1\%$ : Percentage of tumor cells with partial or complete membrane staining in at least 100 viable TCs<br><br>IHC 28-8 pharmDx assay (Dako, Santa Clara, CA, USA)<br><br>*CPS also was retrospectively generated in the original trial. However, main KM curves were stratified based on TPS only | Nivo+Chemo/Chemo  | OS      | ESCC      | Overall         | PD-L1 TPS $\geq 1$                     | No                                                          | Yes                                                             | PD-L1 TPS $< 1$                                                                                     |
|                                                       |                                                                                                                                                                                                                                                                                                             | Nivo+Ipi/Chemo    | OS      | ESCC      | Overall         | PD-L1 TPS $\geq 1$                     | No                                                          | Yes                                                             | PD-L1 TPS $< 1$                                                                                     |
|                                                       |                                                                                                                                                                                                                                                                                                             | Nivo+Chemo/Chemo  | PFS     | ESCC      | Overall         | PD-L1 TPS $\geq 1$                     | No                                                          | Yes                                                             | PD-L1 TPS $< 1$                                                                                     |
|                                                       |                                                                                                                                                                                                                                                                                                             | Nivo+Ipi/Chemo    | PFS     | ESCC      | Overall         | PD-L1 TPS $\geq 1$                     | No                                                          | Yes                                                             | PD-L1 TPS $< 1$                                                                                     |
|                                                       |                                                                                                                                                                                                                                                                                                             | Nivo+Chemo/Chemo  | DOR     | ESCC      | Overall         | PD-L1 TPS $\geq 1$                     | No                                                          | NA                                                              | PD-L1 TPS $< 1$                                                                                     |
| <b>ESCORT</b><br>Huang, 2020<br>NCT03099382           | TPS $\geq 1\%$ : Percentage of viable tumor cells showing partial or complete membrane staining<br><br>IHC 6E8 Abcam (Shuwen Biotech, Deqing, Zhejiang, China)                                                                                                                                              | Camre/Chemo       | OS      | ESCC      | Overall         | PD-L1 TPS $\geq 1$                     | No                                                          | Yes                                                             | PD-L1 TPS $< 1$                                                                                     |
|                                                       |                                                                                                                                                                                                                                                                                                             | Camre+Chemo/Chemo | OS      | ESCC      | Overall         | PD-L1 TPS $\geq 1$                     | Yes                                                         | Yes                                                             | NIL as originally reported in manuscript                                                            |
| <b>ESCORT 1st</b><br>Luo, 2021<br>NCT03691090         | TPS $\geq 1\%$ : Percentage of viable tumor cells showing partial or complete membrane staining, relative to all viable tumor cells present in the sample (positive and negative)<br><br>IHC 6E8 Abcam (Shuwen Biotech, Deqing, Zhejiang, China)                                                            | Camre+Chemo/Chemo | PFS     | ESCC      | Overall         | PD-L1 TPS $\geq 1$                     | Yes                                                         | Yes                                                             | NIL as originally reported in manuscript                                                            |
|                                                       |                                                                                                                                                                                                                                                                                                             | Camre+Chemo/Chemo | DOR     | ESCC      | Overall         | PD-L1 TPS $\geq 1$                     | Yes                                                         | NA                                                              | NIL as originally reported in manuscript                                                            |
|                                                       |                                                                                                                                                                                                                                                                                                             | Camre+Chemo/Chemo | DOR     | ESCC      | Overall         | PD-L1 TPS $\geq 1$                     | Yes                                                         | NA                                                              | NIL as originally reported in manuscript                                                            |

|                                                  |                                                                                                                                                                                                                                         |                    |     |      |         |                                             |     |     |                                                                                      |
|--------------------------------------------------|-----------------------------------------------------------------------------------------------------------------------------------------------------------------------------------------------------------------------------------------|--------------------|-----|------|---------|---------------------------------------------|-----|-----|--------------------------------------------------------------------------------------|
| <b>KN181</b><br>Kojima, 2020<br>NCT02559687      | CPS: defined as the number of PD-L1–positive cells (tumor cells, macrophages, and lymphocytes) divided by the total number of tumor cells, multiplied by 100<br><br>IHC 22C3 pharmDx assay (Agilent Technologies, Carpinteria, CA, USA) | Pembro/Chemo       | OS  | ESCC | Overall | PD-L1 CPS ≥10                               | No  | Yes | PD-L1 CPS <10                                                                        |
| <b>KN590</b><br>Sun, 2021<br>NCT03189719         | CPS: defined as the number of PD-L1–positive cells (tumor cells, macrophages, and lymphocytes) divided by the total number of tumor viable cells<br><br>IHC 22C3 pharmDx assay (Agilent Technologies, Carpinteria, CA, USA)             | Pembro+Chemo/Chemo | OS  | ESCC | Overall | PD-L1 CPS ≥10                               | No  | No  | PD-L1 CPS <10                                                                        |
| <b>ORIENT-2</b><br>Xu, 2022<br>NCT03116152       | IHC 22C3 pharmDx assay (Dako, Santa Clara, CA, USA)<br><br>*Results for CPS and TPS subgroups were reported as hazard ratios only. Curves were only stratified based on NLR/ TCR clonality.                                             | Sinti/Chemo        | OS  | ESCC | Overall | KM curves not reported (only HRs presented) | No  | No  | Not possible as only overall curve published, PD-L1 high subgroup curve not reported |
| <b>ORIENT-15</b><br>Lu, 2022<br>NCT03748134      | CPS: defined as the number of PD-L1 staining cells (tumor cells, macrophages, and lymphocytes) divided by the total number of tumor cells<br><br>IHC 22C3 pharmDx assay (Agilent Technologies, Carpinteria, CA, USA)                    | Sinti+Chemo/Chemo  | OS  | ESCC | Overall | PD-L1 CPS ≥10                               | No  | Yes | PD-L1 CPS <10                                                                        |
|                                                  |                                                                                                                                                                                                                                         | Sinti+Chemo/Chemo  | PFS | ESCC | Overall | PD-L1 CPS ≥10                               | No  | Yes | PD-L1 CPS <10                                                                        |
|                                                  |                                                                                                                                                                                                                                         | Sinti+Chemo/Chemo  | DOR | ESCC | Overall | PD-L1 CPS ≥10                               | No  | NA  | PD-L1 CPS <10                                                                        |
| <b>RATIONALE 302</b><br>Lin, 2022<br>NCT03430843 | TAP: Total percentage of the tumor area covered by tumor cells with any membrane staining above background and tumor-associated immune cells with any staining above background.<br><br>IHC SP263 assay (Ventana)                       | Tisle/Chemo        | OS  | ESCC | Overall | PD-L1 TAP ≥10                               | Yes | Yes | NIL as originally reported in manuscript                                             |

Abbreviations: Nivo, nivolumab; Ipi, ipilimumab; Camre, camrelizumab; Pembro, pembrolizumab; Sinti, sintilimab; Tisle, Tislelizumab; Chemo, chemotherapy; PD-L1, programmed death ligand 1; ESCC, esophageal squamous cell carcinoma; CPS, combined positive score; TPS, tumor proportion score; TAP, tumor area positivity; CM648, CheckMate 648; KN590, KEYNOTE-590; KN181, KEYNOTE-181.

eFigure 1. PRISMA Diagram

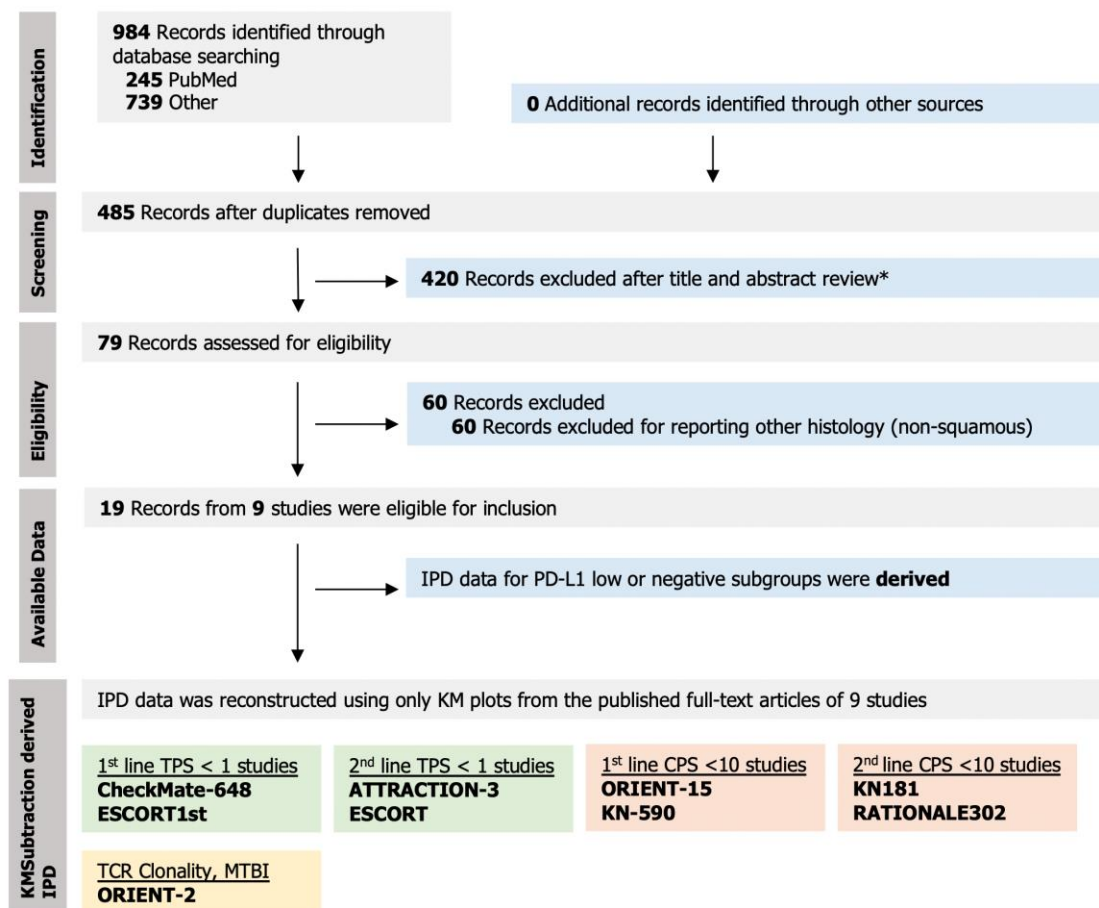

PRISMA, preferred reporting items for systematic reviews and meta-analyses; PD-L1, programmed death ligand 1; CPS, combined positive score; TPS, Tumor Proportion Score; IPD, individual patient data; KM, Kaplan-Meier; ESCC, esophageal squamous cell carcinoma; TCR, T-Cell Receptor; MTBI, Molecular Tumor Burden Index

eFigure 2. Risk-of-Bias Assessment

|       |              | Risk of bias domains |    |    |    |    |         |
|-------|--------------|----------------------|----|----|----|----|---------|
|       |              | D1                   | D2 | D3 | D4 | D5 | Overall |
| Study | CM648        |                      |    |    |    |    |         |
|       | ESCORT1st    |                      |    |    |    |    |         |
|       | KN181        |                      |    |    |    |    |         |
|       | RATIONALE302 |                      |    |    |    |    |         |
|       | ORIENT15     |                      |    |    |    |    |         |
|       | KN590        |                      |    |    |    |    |         |
|       | ATR3         |                      |    |    |    |    |         |
|       | ESCORT       |                      |    |    |    |    |         |
|       | ORIENT2      |                      |    |    |    |    |         |

Domains:  
D1: Risk of bias arising from the randomization process  
D2: Risk of bias due to deviations from the intended interventions  
D3: Risk of bias due to missing outcome data  
D4: Risk of bias in the measurement of the outcome  
D5: Risk of bias in selection of the reported result

Judgement:  
The study is judged to be at low risk of bias for all domains for this result

D, domain; CM648, CheckMate-648; KN181, KEYNOTE-181; KN590, KEYNOTE-590; ATR3, ATTRACTION-3

eFigure 3. Comparisons to Original Curves for Overall and PD-L1–High Subgroups

| Study, outcome, cohort                                       | Original                                                                                                                                                                                                                                                                                                                                                                                                                                                                                                                                                                                                                                                                   | Reconstructed                                                                                                                                                                                                                                                                                                                                                                                                                                                                                                                                                                                                            |     |     |     |     |    |    |    |    |    |    |   |   |   |     |     |     |     |    |    |    |    |    |   |   |
|--------------------------------------------------------------|----------------------------------------------------------------------------------------------------------------------------------------------------------------------------------------------------------------------------------------------------------------------------------------------------------------------------------------------------------------------------------------------------------------------------------------------------------------------------------------------------------------------------------------------------------------------------------------------------------------------------------------------------------------------------|--------------------------------------------------------------------------------------------------------------------------------------------------------------------------------------------------------------------------------------------------------------------------------------------------------------------------------------------------------------------------------------------------------------------------------------------------------------------------------------------------------------------------------------------------------------------------------------------------------------------------|-----|-----|-----|-----|----|----|----|----|----|----|---|---|---|-----|-----|-----|-----|----|----|----|----|----|---|---|
| <p><b>ATTRACTION 3, Overall survival, overall cohort</b></p> | <p>The original figure may be found in the primary trial manuscript</p> <p>Kato K, Cho BC, Takahashi M, Okada M, Lin CY, Chin K, Kadowaki S, Ahn MJ, Hamamoto Y, Doki Y, Yen CC, Kubota Y, Kim SB, Hsu CH, Holtved E, Xynos I, Kodani M, Kitagawa Y. Nivolumab versus chemotherapy in patients with advanced oesophageal squamous cell carcinoma refractory or intolerant to previous chemotherapy (ATTRACTION-3): a multicentre, randomised, open-label, phase 3 trial. <i>Lancet Oncol.</i> 2019 Nov;20(11):1506-1517. doi: 10.1016/S1470-2045(19)30626-6. Epub 2019 Sep 30. Erratum in: <i>Lancet Oncol.</i> 2019 Nov;20(11):e613. PMID: 31582355.</p> <p>Figure 2A</p> | 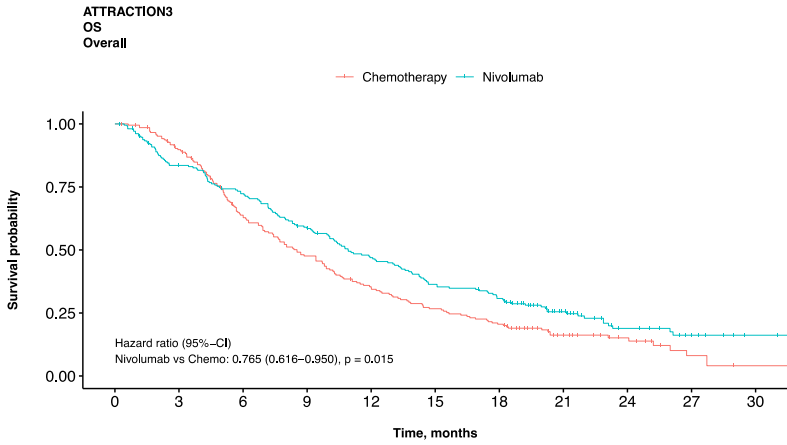 <p>ATTRACTION3 OS Overall</p> <p>— Chemotherapy — Nivolumab</p> <p>Hazard ratio (95% CI)<br/>Nivolumab vs Chemo: 0.765 (0.616–0.950), p = 0.015</p> <table border="1" data-bbox="1220 869 2004 949"> <tr> <td>—</td> <td>209</td> <td>183</td> <td>126</td> <td>94</td> <td>68</td> <td>52</td> <td>40</td> <td>21</td> <td>12</td> <td>4</td> <td>1</td> </tr> <tr> <td>—</td> <td>210</td> <td>171</td> <td>147</td> <td>118</td> <td>93</td> <td>72</td> <td>60</td> <td>34</td> <td>17</td> <td>9</td> <td>4</td> </tr> </table> | —   | 209 | 183 | 126 | 94 | 68 | 52 | 40 | 21 | 12 | 4 | 1 | — | 210 | 171 | 147 | 118 | 93 | 72 | 60 | 34 | 17 | 9 | 4 |
| —                                                            | 209                                                                                                                                                                                                                                                                                                                                                                                                                                                                                                                                                                                                                                                                        | 183                                                                                                                                                                                                                                                                                                                                                                                                                                                                                                                                                                                                                      | 126 | 94  | 68  | 52  | 40 | 21 | 12 | 4  | 1  |    |   |   |   |     |     |     |     |    |    |    |    |    |   |   |
| —                                                            | 210                                                                                                                                                                                                                                                                                                                                                                                                                                                                                                                                                                                                                                                                        | 171                                                                                                                                                                                                                                                                                                                                                                                                                                                                                                                                                                                                                      | 147 | 118 | 93  | 72  | 60 | 34 | 17 | 9  | 4  |    |   |   |   |     |     |     |     |    |    |    |    |    |   |   |

**ATTRACTION  
3, overall  
survival, TPS  
>1%**

The original figure may be found in the primary trial manuscript

Kato K, Cho BC, Takahashi M, Okada M, Lin CY, Chin K, Kadowaki S, Ahn MJ, Hamamoto Y, Doki Y, Yen CC, Kubota Y, Kim SB, Hsu CH, Holtved E, Xynos I, Kodani M, Kitagawa Y. Nivolumab versus chemotherapy in patients with advanced oesophageal squamous cell carcinoma refractory or intolerant to previous chemotherapy (ATTRACTION-3): a multicentre, randomised, open-label, phase 3 trial. *Lancet Oncol.* 2019 Nov;20(11):1506-1517. doi: 10.1016/S1470-2045(19)30626-6. Epub 2019 Sep 30. Erratum in: *Lancet Oncol.* 2019 Nov;20(11):e613. PMID: 31582355.

Figure S2B

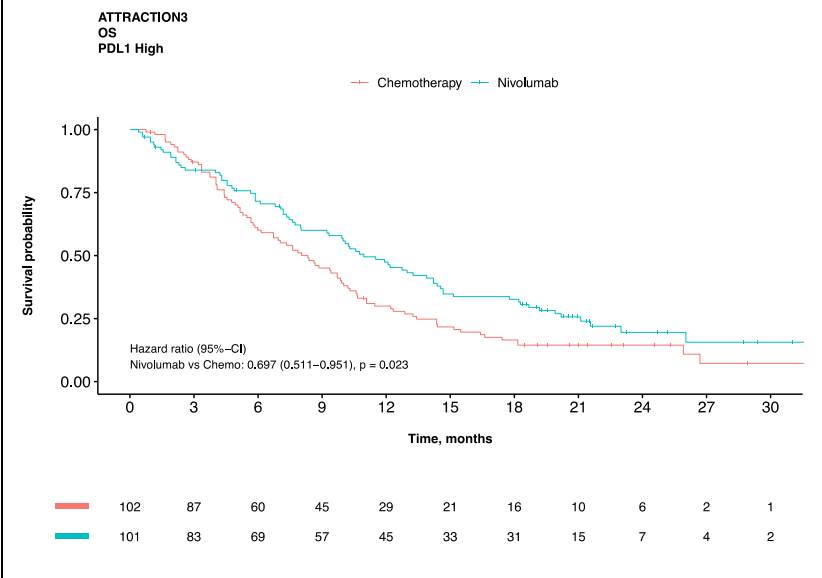



**CM648,  
overall  
survival,  
overall cohort**

The original figure may be found in the primary trial manuscript

Doki Y, Ajani JA, Kato K, Xu J, Wyrwicz L, Motoyama S, Ogata T, Kawakami H, Hsu CH, Adenis A, El Hajbi F, Di Bartolomeo M, Braghiroli MI, Holtved E, Ostoich SA, Kim HR, Ueno M, Mansoor W, Yang WC, Liu T, Bridgewater J, Makino T, Xynos I, Liu X, Lei M, Kondo K, Patel A, Gricar J, Chau I, Kitagawa Y; CheckMate 648 Trial Investigators. Nivolumab Combination Therapy in Advanced Esophageal Squamous-Cell Carcinoma. *N Engl J Med.* 2022 Feb 3;386(5):449-462. Doi: 10.1056/NEJMoa2111380. PMID: 35108470.

Figure 1B  
Figure 2B

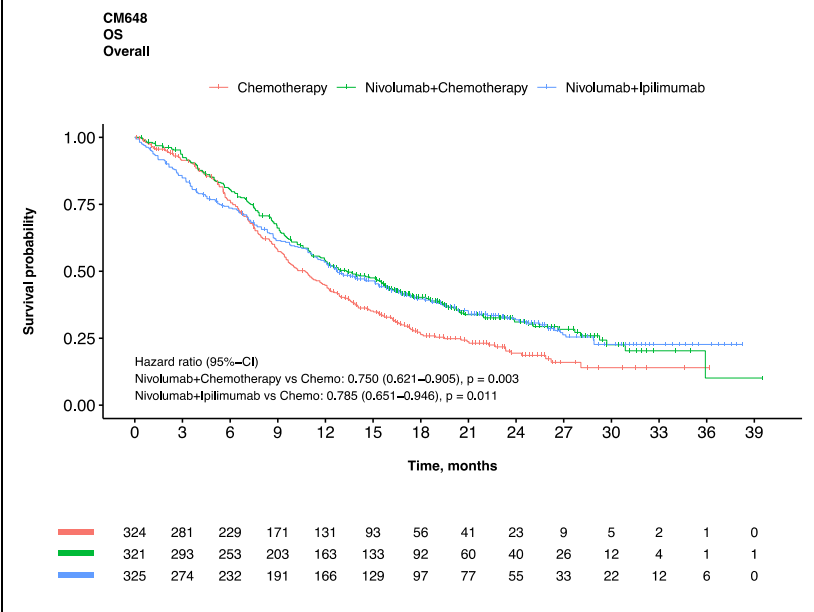

**CM648,  
overall  
survival, TPS  
≥1**

The original figure may be found in the primary trial manuscript

Doki Y, Ajani JA, Kato K, Xu J, Wyrwicz L, Motoyama S, Ogata T, Kawakami H, Hsu CH, Adenis A, El Hajbi F, Di Bartolomeo M, Braghiroli MI, Holtved E, Ostoich SA, Kim HR, Ueno M, Mansoor W, Yang WC, Liu T, Bridgewater J, Makino T, Xynos I, Liu X, Lei M, Kondo K, Patel A, Gricar J, Chau I, Kitagawa Y; CheckMate 648 Trial Investigators. Nivolumab Combination Therapy in Advanced Esophageal Squamous-Cell Carcinoma. *N Engl J Med.* 2022 Feb 3;386(5):449-462. Doi: 10.1056/NEJMoa2111380. PMID: 35108470.

Figure 1A  
Figure 2A

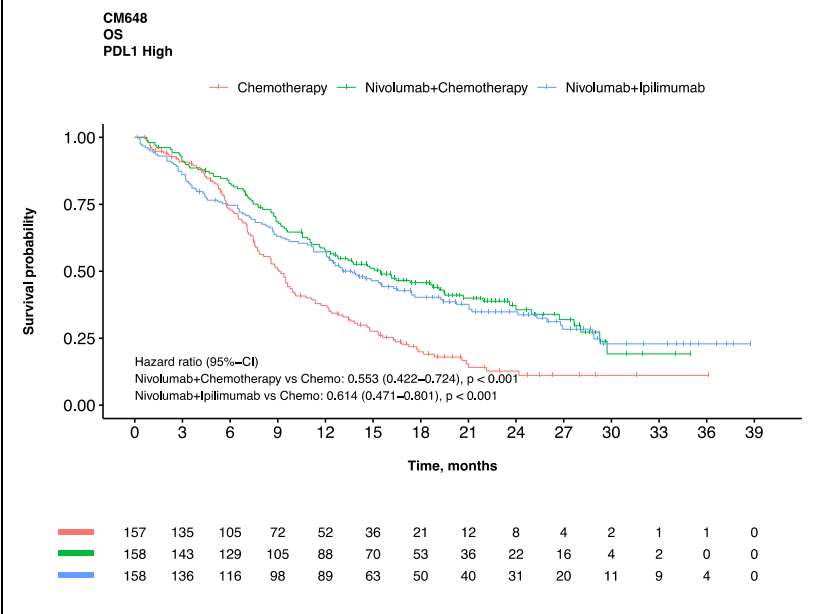

**CM648,  
Progression  
Free Survival,  
Overall cohort**

The original figure may be found in the primary trial manuscript

Doki Y, Ajani JA, Kato K, Xu J, Wyrwicz L, Motoyama S, Ogata T, Kawakami H, Hsu CH, Adenis A, El Hajbi F, Di Bartolomeo M, Braghiroli MI, Holtved E, Ostoich SA, Kim HR, Ueno M, Mansoor W, Yang WC, Liu T, Bridgewater J, Makino T, Xynos I, Liu X, Lei M, Kondo K, Patel A, Gricar J, Chau I, Kitagawa Y; CheckMate 648 Trial Investigators. Nivolumab Combination Therapy in Advanced Esophageal Squamous-Cell Carcinoma. *N Engl J Med.* 2022 Feb 3;386(5):449-462. Doi: 10.1056/NEJMoa2111380. PMID: 35108470.

Figure 1D  
Figure 2D

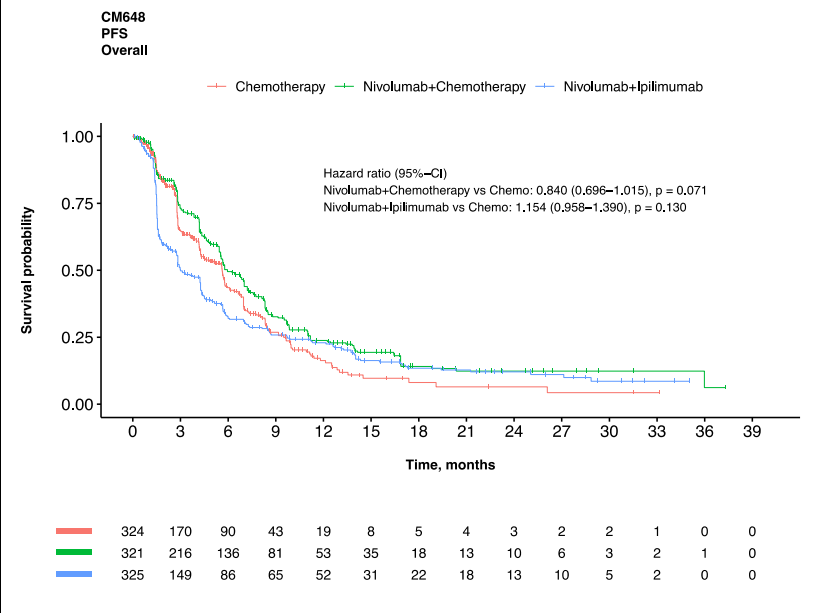

**CM648,  
Progression  
Free Survival,  
TPS ≥1**

The original figure may be found in the primary trial manuscript

Doki Y, Ajani JA, Kato K, Xu J, Wyrwicz L, Motoyama S, Ogata T, Kawakami H, Hsu CH, Adenis A, El Hajbi F, Di Bartolomeo M, Braghiroli MI, Holtved E, Ostoich SA, Kim HR, Ueno M, Mansoor W, Yang WC, Liu T, Bridgewater J, Makino T, Xynos I, Liu X, Lei M, Kondo K, Patel A, Gricar J, Chau I, Kitagawa Y; CheckMate 648 Trial Investigators. Nivolumab Combination Therapy in Advanced Esophageal Squamous-Cell Carcinoma. *N Engl J Med.* 2022 Feb 3;386(5):449-462. Doi: 10.1056/NEJMoa2111380. PMID: 35108470.

Figure 1C  
Figure 2C

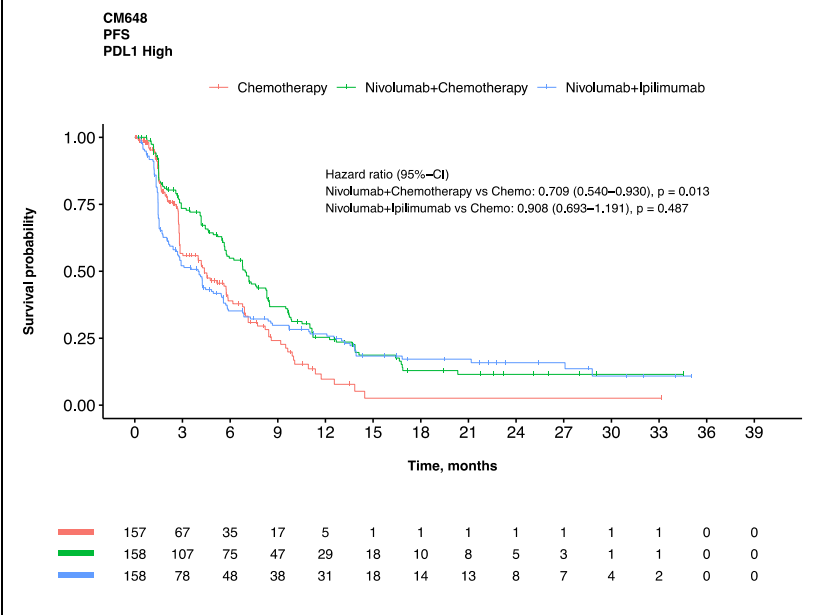

**CM648, DOR,  
Overall cohort**

The original figure may be found in the primary trial manuscript

Doki Y, Ajani JA, Kato K, Xu J, Wyrwicz L, Motoyama S, Ogata T, Kawakami H, Hsu CH, Adenis A, El Hajbi F, Di Bartolomeo M, Braghiroli MI, Holtved E, Ostoich SA, Kim HR, Ueno M, Mansoor W, Yang WC, Liu T, Bridgewater J, Makino T, Xynos I, Liu X, Lei M, Kondo K, Patel A, Gricar J, Chau I, Kitagawa Y; CheckMate 648 Trial Investigators. Nivolumab Combination Therapy in Advanced Esophageal Squamous-Cell Carcinoma. *N Engl J Med.* 2022 Feb 3;386(5):449-462. Doi: 10.1056/NEJMoa2111380. PMID: 35108470.

Figure S2B  
Figure S2D

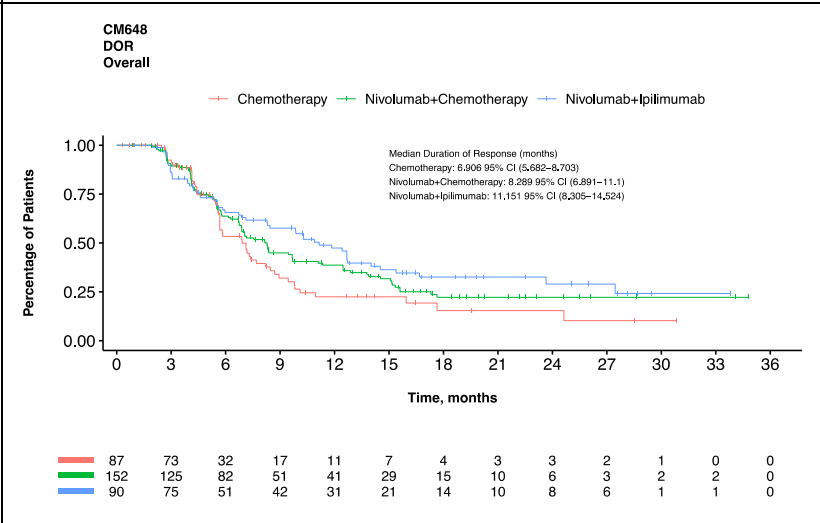

|                                                        |                                                                                                                                                                                                                                                                                                                                                                                                                                                                                                                                                                                                                                                                                     |                                                                                                                                                                                                                                                                                                                                                                                                                                                                                                                                                                                                                                                                                                                                                                                                                                                                       |     |     |     |    |    |    |    |   |   |     |     |     |     |    |    |    |    |    |   |   |   |   |   |   |    |    |    |    |    |    |    |   |   |   |   |   |
|--------------------------------------------------------|-------------------------------------------------------------------------------------------------------------------------------------------------------------------------------------------------------------------------------------------------------------------------------------------------------------------------------------------------------------------------------------------------------------------------------------------------------------------------------------------------------------------------------------------------------------------------------------------------------------------------------------------------------------------------------------|-----------------------------------------------------------------------------------------------------------------------------------------------------------------------------------------------------------------------------------------------------------------------------------------------------------------------------------------------------------------------------------------------------------------------------------------------------------------------------------------------------------------------------------------------------------------------------------------------------------------------------------------------------------------------------------------------------------------------------------------------------------------------------------------------------------------------------------------------------------------------|-----|-----|-----|----|----|----|----|---|---|-----|-----|-----|-----|----|----|----|----|----|---|---|---|---|---|---|----|----|----|----|----|----|----|---|---|---|---|---|
| <p><b>CM648, DOR, TPS ≥1</b></p>                       | <p>The original figure may be found in the primary trial manuscript</p> <p>Doki Y, Ajani JA, Kato K, Xu J, Wyrwicz L, Motoyama S, Ogata T, Kawakami H, Hsu CH, Adenis A, El Hajbi F, Di Bartolomeo M, Braghiroli MI, Holtved E, Ostoich SA, Kim HR, Ueno M, Mansoor W, Yang WC, Liu T, Bridgewater J, Makino T, Xynos I, Liu X, Lei M, Kondo K, Patel A, Gricar J, Chau I, Kitagawa Y; CheckMate 648 Trial Investigators. Nivolumab Combination Therapy in Advanced Esophageal Squamous-Cell Carcinoma. <i>N Engl J Med.</i> 2022 Feb 3;386(5):449-462. Doi: 10.1056/NEJMoa2111380. PMID: 35108470.</p> <p>Figure S2A<br/>Figure S2C</p>                                            | 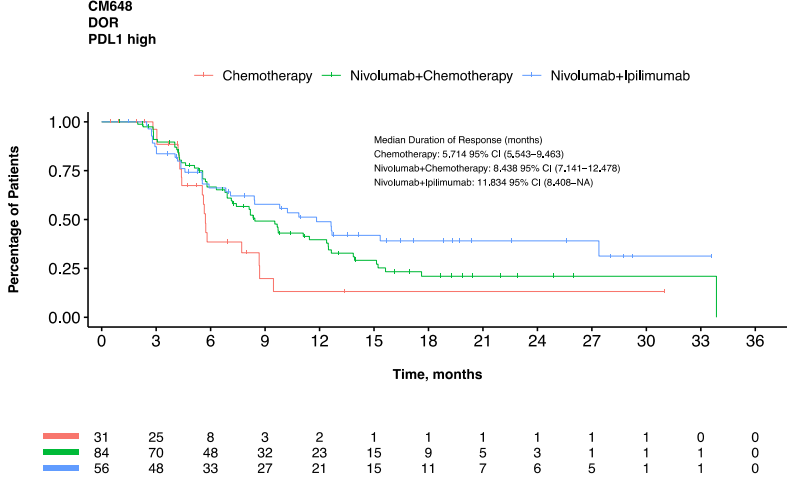 <p><b>CM648 DOR PDL1 high</b></p> <p>— Chemotherapy — Nivolumab+Chemotherapy — Nivolumab+Ipilimumab</p> <p>Median Duration of Response (months)<br/>     Chemotherapy: 5.714 95% CI (5.343–6.463)<br/>     Nivolumab+Chemotherapy: 6.438 95% CI (7.141–12.478)<br/>     Nivolumab+Ipilimumab: 11.834 95% CI (8.408–NA)</p> <table border="1"> <tr> <td>31</td><td>25</td><td>8</td><td>3</td><td>2</td><td>1</td><td>1</td><td>1</td><td>1</td><td>1</td><td>0</td><td>0</td> </tr> <tr> <td>84</td><td>70</td><td>48</td><td>32</td><td>23</td><td>15</td><td>9</td><td>5</td><td>3</td><td>1</td><td>1</td><td>0</td> </tr> <tr> <td>56</td><td>48</td><td>33</td><td>27</td><td>21</td><td>15</td><td>11</td><td>7</td><td>6</td><td>5</td><td>1</td><td>0</td> </tr> </table> | 31  | 25  | 8   | 3  | 2  | 1  | 1  | 1 | 1 | 1   | 0   | 0   | 84  | 70 | 48 | 32 | 23 | 15 | 9 | 5 | 3 | 1 | 1 | 0 | 56 | 48 | 33 | 27 | 21 | 15 | 11 | 7 | 6 | 5 | 1 | 0 |
| 31                                                     | 25                                                                                                                                                                                                                                                                                                                                                                                                                                                                                                                                                                                                                                                                                  | 8                                                                                                                                                                                                                                                                                                                                                                                                                                                                                                                                                                                                                                                                                                                                                                                                                                                                     | 3   | 2   | 1   | 1  | 1  | 1  | 1  | 0 | 0 |     |     |     |     |    |    |    |    |    |   |   |   |   |   |   |    |    |    |    |    |    |    |   |   |   |   |   |
| 84                                                     | 70                                                                                                                                                                                                                                                                                                                                                                                                                                                                                                                                                                                                                                                                                  | 48                                                                                                                                                                                                                                                                                                                                                                                                                                                                                                                                                                                                                                                                                                                                                                                                                                                                    | 32  | 23  | 15  | 9  | 5  | 3  | 1  | 1 | 0 |     |     |     |     |    |    |    |    |    |   |   |   |   |   |   |    |    |    |    |    |    |    |   |   |   |   |   |
| 56                                                     | 48                                                                                                                                                                                                                                                                                                                                                                                                                                                                                                                                                                                                                                                                                  | 33                                                                                                                                                                                                                                                                                                                                                                                                                                                                                                                                                                                                                                                                                                                                                                                                                                                                    | 27  | 21  | 15  | 11 | 7  | 6  | 5  | 1 | 0 |     |     |     |     |    |    |    |    |    |   |   |   |   |   |   |    |    |    |    |    |    |    |   |   |   |   |   |
| <p><b>ESCORT, overall survival, overall cohort</b></p> | <p>The original figure may be found in the primary trial manuscript</p> <p>Huang J, Xu J, Chen Y, Zhuang W, Zhang Y, Chen Z, Chen J, Zhang H, Niu Z, Fan Q, Lin L, Gu K, Liu Y, Ba Y, Miao Z, Jiang X, Zeng M, Chen J, Fu Z, Gan L, Wang J, Zhan X, Liu T, Li Z, Shen L, Shu Y, Zhang T, Yang Q, Zou J; ESCORT Study Group. Camrelizumab versus investigator's choice of chemotherapy as second-line therapy for advanced or metastatic oesophageal squamous cell carcinoma (ESCORT): a multicentre, randomised, open-label, phase 3 study. <i>Lancet Oncol.</i> 2020 Jun;21(6):832-842. doi: 10.1016/S1470-2045(20)30110-8. Epub 2020 May 13. PMID: 32416073.</p> <p>Figure 2A</p> |  <p><b>ESCORT OS Overall</b></p> <p>— Chemotherapy — Camrelizumab</p> <p>Hazard ratio (95%–CI)<br/>     Camrelizumab vs Chemo: 0.708 (0.576–0.870), p = 0.001</p> <table border="1"> <tr> <td>220</td><td>182</td><td>118</td><td>67</td><td>44</td><td>24</td><td>10</td><td>4</td><td>0</td> </tr> <tr> <td>228</td><td>191</td><td>141</td><td>104</td><td>67</td><td>37</td><td>20</td><td>5</td><td>0</td> </tr> </table>                                                                                                                                                                                                                                                                                                                                                    | 220 | 182 | 118 | 67 | 44 | 24 | 10 | 4 | 0 | 228 | 191 | 141 | 104 | 67 | 37 | 20 | 5  | 0  |   |   |   |   |   |   |    |    |    |    |    |    |    |   |   |   |   |   |
| 220                                                    | 182                                                                                                                                                                                                                                                                                                                                                                                                                                                                                                                                                                                                                                                                                 | 118                                                                                                                                                                                                                                                                                                                                                                                                                                                                                                                                                                                                                                                                                                                                                                                                                                                                   | 67  | 44  | 24  | 10 | 4  | 0  |    |   |   |     |     |     |     |    |    |    |    |    |   |   |   |   |   |   |    |    |    |    |    |    |    |   |   |   |   |   |
| 228                                                    | 191                                                                                                                                                                                                                                                                                                                                                                                                                                                                                                                                                                                                                                                                                 | 141                                                                                                                                                                                                                                                                                                                                                                                                                                                                                                                                                                                                                                                                                                                                                                                                                                                                   | 104 | 67  | 37  | 20 | 5  | 0  |    |   |   |     |     |     |     |    |    |    |    |    |   |   |   |   |   |   |    |    |    |    |    |    |    |   |   |   |   |   |

|                                                               |                                                                                                                                                                                                                                                                                                                                                                                                                                                                                                                                                                                                                                                                                             |                                                                                                                                                                                                                                                                                                                                                                                        |     |     |     |     |     |    |   |     |     |     |     |     |    |    |    |    |   |   |
|---------------------------------------------------------------|---------------------------------------------------------------------------------------------------------------------------------------------------------------------------------------------------------------------------------------------------------------------------------------------------------------------------------------------------------------------------------------------------------------------------------------------------------------------------------------------------------------------------------------------------------------------------------------------------------------------------------------------------------------------------------------------|----------------------------------------------------------------------------------------------------------------------------------------------------------------------------------------------------------------------------------------------------------------------------------------------------------------------------------------------------------------------------------------|-----|-----|-----|-----|-----|----|---|-----|-----|-----|-----|-----|----|----|----|----|---|---|
| <p><b>ESCORT, overall survival, TPS<math>\geq</math>1</b></p> | <p>The original figure may be found in the primary trial manuscript</p> <p>Huang J, Xu J, Chen Y, Zhuang W, Zhang Y, Chen Z, Chen J, Zhang H, Niu Z, Fan Q, Lin L, Gu K, Liu Y, Ba Y, Miao Z, Jiang X, Zeng M, Chen J, Fu Z, Gan L, Wang J, Zhan X, Liu T, Li Z, Shen L, Shu Y, Zhang T, Yang Q, Zou J; ESCORT Study Group. Camrelizumab versus investigator's choice of chemotherapy as second-line therapy for advanced or metastatic oesophageal squamous cell carcinoma (ESCORT): a multicentre, randomised, open-label, phase 3 study. <i>Lancet Oncol.</i> 2020 Jun;21(6):832-842. doi: 10.1016/S1470-2045(20)30110-8. Epub 2020 May 13. PMID: 32416073.</p> <p>Figure S3</p>         | 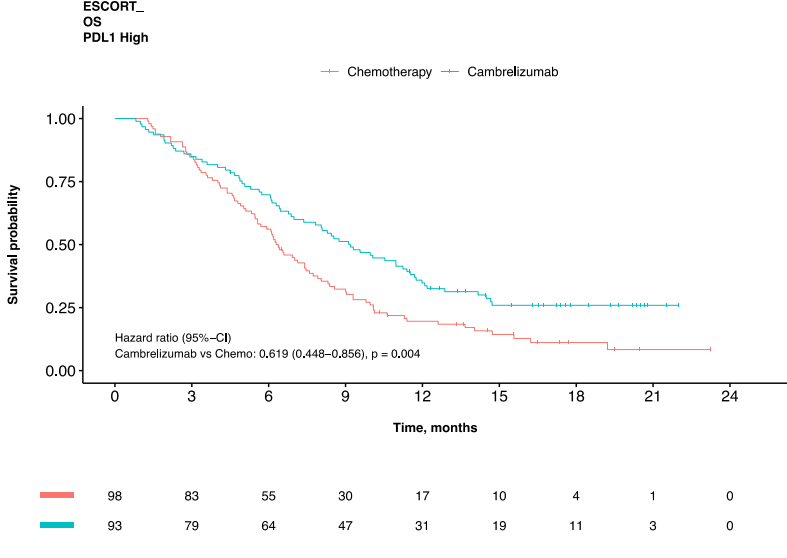 <table border="1" data-bbox="1243 694 1982 774"> <tr> <td>98</td> <td>83</td> <td>55</td> <td>30</td> <td>17</td> <td>10</td> <td>4</td> <td>1</td> <td>0</td> </tr> <tr> <td>93</td> <td>79</td> <td>64</td> <td>47</td> <td>31</td> <td>19</td> <td>11</td> <td>3</td> <td>0</td> </tr> </table> | 98  | 83  | 55  | 30  | 17  | 10 | 4 | 1   | 0   | 93  | 79  | 64  | 47 | 31 | 19 | 11 | 3 | 0 |
| 98                                                            | 83                                                                                                                                                                                                                                                                                                                                                                                                                                                                                                                                                                                                                                                                                          | 55                                                                                                                                                                                                                                                                                                                                                                                     | 30  | 17  | 10  | 4   | 1   | 0  |   |     |     |     |     |     |    |    |    |    |   |   |
| 93                                                            | 79                                                                                                                                                                                                                                                                                                                                                                                                                                                                                                                                                                                                                                                                                          | 64                                                                                                                                                                                                                                                                                                                                                                                     | 47  | 31  | 19  | 11  | 3   | 0  |   |     |     |     |     |     |    |    |    |    |   |   |
| <p><b>ESCORT1, overall survival, overall cohort</b></p>       | <p>The original figure may be found in the primary trial manuscript</p> <p>Luo H, Lu J, Bai Y, Mao T, Wang J, Fan Q, Zhang Y, Zhao K, Chen Z, Gao S, Li J, Fu Z, Gu K, Liu Z, Wu L, Zhang X, Feng J, Niu Z, Ba Y, Zhang H, Liu Y, Zhang L, Min X, Huang J, Cheng Y, Wang D, Shen Y, Yang Q, Zou J, Xu RH; ESCORT-1st Investigators. Effect of Camrelizumab vs Placebo Added to Chemotherapy on Survival and Progression-Free Survival in Patients With Advanced or Metastatic Esophageal Squamous Cell Carcinoma: The ESCORT-1st Randomized Clinical Trial. <i>JAMA.</i> 2021 Sep 14;326(10):916-925. doi: 10.1001/jama.2021.12836. PMID: 34519801; PMCID: PMC8441593.</p> <p>Figure 2A</p> |  <table border="1" data-bbox="1243 1284 1982 1364"> <tr> <td>298</td> <td>282</td> <td>249</td> <td>182</td> <td>110</td> <td>55</td> <td>0</td> </tr> <tr> <td>298</td> <td>288</td> <td>260</td> <td>198</td> <td>128</td> <td>71</td> <td>33</td> </tr> </table>                                | 298 | 282 | 249 | 182 | 110 | 55 | 0 | 298 | 288 | 260 | 198 | 128 | 71 | 33 |    |    |   |   |
| 298                                                           | 282                                                                                                                                                                                                                                                                                                                                                                                                                                                                                                                                                                                                                                                                                         | 249                                                                                                                                                                                                                                                                                                                                                                                    | 182 | 110 | 55  | 0   |     |    |   |     |     |     |     |     |    |    |    |    |   |   |
| 298                                                           | 288                                                                                                                                                                                                                                                                                                                                                                                                                                                                                                                                                                                                                                                                                         | 260                                                                                                                                                                                                                                                                                                                                                                                    | 198 | 128 | 71  | 33  |     |    |   |     |     |     |     |     |    |    |    |    |   |   |

|                                                                |                                                                                                                                                                                                                                                                                                                                                                                                                                                                                                                                                                                                                                                                                              |                                                                                                                                                                                                                                                                                                                                                                                                                                                                                  |     |     |     |    |    |    |    |     |     |     |     |     |     |     |    |    |    |    |    |    |   |   |
|----------------------------------------------------------------|----------------------------------------------------------------------------------------------------------------------------------------------------------------------------------------------------------------------------------------------------------------------------------------------------------------------------------------------------------------------------------------------------------------------------------------------------------------------------------------------------------------------------------------------------------------------------------------------------------------------------------------------------------------------------------------------|----------------------------------------------------------------------------------------------------------------------------------------------------------------------------------------------------------------------------------------------------------------------------------------------------------------------------------------------------------------------------------------------------------------------------------------------------------------------------------|-----|-----|-----|----|----|----|----|-----|-----|-----|-----|-----|-----|-----|----|----|----|----|----|----|---|---|
| <p><b>ESCORT1, overall survival, TPS<math>\geq</math>1</b></p> | <p>The original figure may be found in the primary trial manuscript</p> <p>Luo H, Lu J, Bai Y, Mao T, Wang J, Fan Q, Zhang Y, Zhao K, Chen Z, Gao S, Li J, Fu Z, Gu K, Liu Z, Wu L, Zhang X, Feng J, Niu Z, Ba Y, Zhang H, Liu Y, Zhang L, Min X, Huang J, Cheng Y, Wang D, Shen Y, Yang Q, Zou J, Xu RH; ESCORT-1st Investigators. Effect of Camrelizumab vs Placebo Added to Chemotherapy on Survival and Progression-Free Survival in Patients With Advanced or Metastatic Esophageal Squamous Cell Carcinoma: The ESCORT-1st Randomized Clinical Trial. <i>JAMA</i>. 2021 Sep 14;326(10):916-925. doi: 10.1001/jama.2021.12836. PMID: 34519801; PMCID: PMC8441593.</p> <p>eFigure 5B</p> | <p>ESCORT1st OS PDL1 High</p> <p>— Chemotherapy — Chemotherapy+Camrelizumab</p> <p>Hazard ratio (95%-CI)<br/>Chemotherapy+Camrelizumab vs Chemo: 0.626 (0.457-0.856), p = 0.003</p> <table border="1"> <tr> <td>163</td> <td>152</td> <td>133</td> <td>93</td> <td>53</td> <td>20</td> <td>0</td> </tr> <tr> <td>166</td> <td>161</td> <td>146</td> <td>113</td> <td>71</td> <td>34</td> <td>16</td> </tr> </table>                                                              | 163 | 152 | 133 | 93 | 53 | 20 | 0  | 166 | 161 | 146 | 113 | 71  | 34  | 16  |    |    |    |    |    |    |   |   |
| 163                                                            | 152                                                                                                                                                                                                                                                                                                                                                                                                                                                                                                                                                                                                                                                                                          | 133                                                                                                                                                                                                                                                                                                                                                                                                                                                                              | 93  | 53  | 20  | 0  |    |    |    |     |     |     |     |     |     |     |    |    |    |    |    |    |   |   |
| 166                                                            | 161                                                                                                                                                                                                                                                                                                                                                                                                                                                                                                                                                                                                                                                                                          | 146                                                                                                                                                                                                                                                                                                                                                                                                                                                                              | 113 | 71  | 34  | 16 |    |    |    |     |     |     |     |     |     |     |    |    |    |    |    |    |   |   |
| <p><b>KN181, overall survival, overall cohort</b></p>          | <p>The original figure may be found in the primary trial manuscript</p> <p>Kojima T, Shah MA, Muro K, Francois E, Adenis A, Hsu CH, Doi T, Moriwaki T, Kim SB, Lee SH, Bennouna J, Kato K, Shen L, Enzinger P, Qin SK, Ferreira P, Chen J, Girotto G, de la Fouchardiere C, Senellart H, Al-Rajabi R, Lordick F, Wang R, Suryawanshi S, Bhagia P, Kang SP, Metges JP; KEYNOTE-181 Investigators. Randomized Phase III KEYNOTE-181 Study of Pembrolizumab Versus Chemotherapy in Advanced Esophageal Cancer. <i>J Clin Oncol</i>. 2020 Dec 10;38(35):4138-4148. doi: 10.1200/JCO.20.01888. Epub 2020 Oct 7. PMID: 33026938.</p> <p>Figure 2B</p>                                              | <p>KN181 OS Overall</p> <p>— Chemotherapy — Pembrolizumab</p> <p>Hazard ratio (95%-CI)<br/>Pembrolizumab vs Chemo: 0.761 (0.615-0.941), p = 0.012</p> <table border="1"> <tr> <td>203</td> <td>161</td> <td>117</td> <td>75</td> <td>50</td> <td>33</td> <td>20</td> <td>12</td> <td>8</td> <td>5</td> <td>2</td> </tr> <tr> <td>198</td> <td>163</td> <td>121</td> <td>94</td> <td>77</td> <td>52</td> <td>38</td> <td>21</td> <td>12</td> <td>7</td> <td>1</td> </tr> </table> | 203 | 161 | 117 | 75 | 50 | 33 | 20 | 12  | 8   | 5   | 2   | 198 | 163 | 121 | 94 | 77 | 52 | 38 | 21 | 12 | 7 | 1 |
| 203                                                            | 161                                                                                                                                                                                                                                                                                                                                                                                                                                                                                                                                                                                                                                                                                          | 117                                                                                                                                                                                                                                                                                                                                                                                                                                                                              | 75  | 50  | 33  | 20 | 12 | 8  | 5  | 2   |     |     |     |     |     |     |    |    |    |    |    |    |   |   |
| 198                                                            | 163                                                                                                                                                                                                                                                                                                                                                                                                                                                                                                                                                                                                                                                                                          | 121                                                                                                                                                                                                                                                                                                                                                                                                                                                                              | 94  | 77  | 52  | 38 | 21 | 12 | 7  | 1   |     |     |     |     |     |     |    |    |    |    |    |    |   |   |

|                                                               |                                                                                                                                                                                                                                                                                                                                                                                                                                                                                                                                                                                                                                                                                                                            |                                                                                                                                                                                                                                                                                                                                                                                                                                                                                                   |     |     |     |     |     |    |    |    |    |    |   |     |     |     |     |     |     |    |    |    |    |   |
|---------------------------------------------------------------|----------------------------------------------------------------------------------------------------------------------------------------------------------------------------------------------------------------------------------------------------------------------------------------------------------------------------------------------------------------------------------------------------------------------------------------------------------------------------------------------------------------------------------------------------------------------------------------------------------------------------------------------------------------------------------------------------------------------------|---------------------------------------------------------------------------------------------------------------------------------------------------------------------------------------------------------------------------------------------------------------------------------------------------------------------------------------------------------------------------------------------------------------------------------------------------------------------------------------------------|-----|-----|-----|-----|-----|----|----|----|----|----|---|-----|-----|-----|-----|-----|-----|----|----|----|----|---|
| <p><b>KN181, overall survival, CPS<math>\geq</math>10</b></p> | <p>The original figure may be found in the primary trial manuscript</p> <p>Kojima T, Shah MA, Muro K, Francois E, Adenis A, Hsu CH, Doi T, Moriwaki T, Kim SB, Lee SH, Bennouna J, Kato K, Shen L, Enzinger P, Qin SK, Ferreira P, Chen J, Girotto G, de la Fouchardiere C, Senellart H, Al-Rajabi R, Lordick F, Wang R, Suryawanshi S, Bhagia P, Kang SP, Metges JP; KEYNOTE-181 Investigators. Randomized Phase III KEYNOTE-181 Study of Pembrolizumab Versus Chemotherapy in Advanced Esophageal Cancer. <i>J Clin Oncol.</i> 2020 Dec 10;38(35):4138-4148. doi: 10.1200/JCO.20.01888. Epub 2020 Oct 7. PMID: 33026938.</p> <p>Figure S4</p>                                                                            | <p>KN181 OS PDL1 High</p> <p>— Chemotherapy — Pembrolizumab</p> <p>Hazard ratio (95%-CI)<br/>Pembrolizumab vs Chemo: 0.611 (0.436-0.856), p = 0.004</p> <table border="1"> <tr> <td>82</td><td>62</td><td>42</td><td>31</td><td>18</td><td>13</td><td>8</td><td>4</td><td>3</td><td>2</td><td>1</td> </tr> <tr> <td>85</td><td>75</td><td>56</td><td>48</td><td>40</td><td>27</td><td>21</td><td>9</td><td>4</td><td>2</td><td>0</td> </tr> </table>                                              | 82  | 62  | 42  | 31  | 18  | 13 | 8  | 4  | 3  | 2  | 1 | 85  | 75  | 56  | 48  | 40  | 27  | 21 | 9  | 4  | 2  | 0 |
| 82                                                            | 62                                                                                                                                                                                                                                                                                                                                                                                                                                                                                                                                                                                                                                                                                                                         | 42                                                                                                                                                                                                                                                                                                                                                                                                                                                                                                | 31  | 18  | 13  | 8   | 4   | 3  | 2  | 1  |    |    |   |     |     |     |     |     |     |    |    |    |    |   |
| 85                                                            | 75                                                                                                                                                                                                                                                                                                                                                                                                                                                                                                                                                                                                                                                                                                                         | 56                                                                                                                                                                                                                                                                                                                                                                                                                                                                                                | 48  | 40  | 27  | 21  | 9   | 4  | 2  | 0  |    |    |   |     |     |     |     |     |     |    |    |    |    |   |
| <p><b>KN590, overall survival, overall cohort</b></p>         | <p>The original figure may be found in the primary trial manuscript</p> <p>Sun JM, Shen L, Shah MA, Enzinger P, Adenis A, Doi T, Kojima T, Metges JP, Li Z, Kim SB, Cho BC, Mansoor W, Li SH, Sunpaweravong P, Maqueda MA, Goekkurt E, Hara H, Antunes L, Fountzilias C, Tsuji A, Oliden VC, Liu Q, Shah S, Bhagia P, Kato K; KEYNOTE-590 Investigators. Pembrolizumab plus chemotherapy versus chemotherapy alone for first-line treatment of advanced oesophageal cancer (KEYNOTE-590): a randomised, placebo-controlled, phase 3 study. <i>Lancet.</i> 2021 Aug 28;398(10302):759-771. doi: 10.1016/S0140-6736(21)01234-4. Erratum in: <i>Lancet.</i> 2021 Nov 20;398(10314):1874. PMID: 34454674.</p> <p>Figure 2B</p> | <p>KN590 OS Overall</p> <p>— Chemotherapy — Pembrolizumab+Chemotherapy</p> <p>Hazard ratio (95%-CI)<br/>Pembrolizumab+Chemotherapy vs Chemo: 0.715 (0.589-0.868), p &lt; 0.001</p> <table border="1"> <tr> <td>274</td><td>247</td><td>202</td><td>146</td><td>103</td><td>75</td><td>57</td><td>34</td><td>23</td><td>13</td><td>4</td> </tr> <tr> <td>274</td><td>258</td><td>221</td><td>175</td><td>139</td><td>111</td><td>89</td><td>50</td><td>27</td><td>14</td><td>6</td> </tr> </table> | 274 | 247 | 202 | 146 | 103 | 75 | 57 | 34 | 23 | 13 | 4 | 274 | 258 | 221 | 175 | 139 | 111 | 89 | 50 | 27 | 14 | 6 |
| 274                                                           | 247                                                                                                                                                                                                                                                                                                                                                                                                                                                                                                                                                                                                                                                                                                                        | 202                                                                                                                                                                                                                                                                                                                                                                                                                                                                                               | 146 | 103 | 75  | 57  | 34  | 23 | 13 | 4  |    |    |   |     |     |     |     |     |     |    |    |    |    |   |
| 274                                                           | 258                                                                                                                                                                                                                                                                                                                                                                                                                                                                                                                                                                                                                                                                                                                        | 221                                                                                                                                                                                                                                                                                                                                                                                                                                                                                               | 175 | 139 | 111 | 89  | 50  | 27 | 14 | 6  |    |    |   |     |     |     |     |     |     |    |    |    |    |   |



|                                                          |                                                                                                                                                                                                                                                                                                                                                                                                                                                                                                                                                                                                                                                                                                                            |                                                                                                                                                                                                                                                                                                                                                                                                                                                                                                      |     |     |     |     |     |    |    |    |    |   |   |     |     |     |     |     |     |    |    |    |   |   |
|----------------------------------------------------------|----------------------------------------------------------------------------------------------------------------------------------------------------------------------------------------------------------------------------------------------------------------------------------------------------------------------------------------------------------------------------------------------------------------------------------------------------------------------------------------------------------------------------------------------------------------------------------------------------------------------------------------------------------------------------------------------------------------------------|------------------------------------------------------------------------------------------------------------------------------------------------------------------------------------------------------------------------------------------------------------------------------------------------------------------------------------------------------------------------------------------------------------------------------------------------------------------------------------------------------|-----|-----|-----|-----|-----|----|----|----|----|---|---|-----|-----|-----|-----|-----|-----|----|----|----|---|---|
| <p><b>KN590, overall survival, CPS≥10</b></p>            | <p>The original figure may be found in the primary trial manuscript</p> <p>Sun JM, Shen L, Shah MA, Enzinger P, Adenis A, Doi T, Kojima T, Metges JP, Li Z, Kim SB, Cho BC, Mansoor W, Li SH, Sunpaweravong P, Maqueda MA, Goekkurt E, Hara H, Antunes L, Fountzilias C, Tsuji A, Oliden VC, Liu Q, Shah S, Bhagia P, Kato K; KEYNOTE-590 Investigators. Pembrolizumab plus chemotherapy versus chemotherapy alone for first-line treatment of advanced oesophageal cancer (KEYNOTE-590): a randomised, placebo-controlled, phase 3 study. <i>Lancet</i>. 2021 Aug 28;398(10302):759-771. doi: 10.1016/S0140-6736(21)01234-4. Erratum in: <i>Lancet</i>. 2021 Nov 20;398(10314):1874. PMID: 34454674.</p> <p>Figure 2A</p> | <p>KN590 OS PDL1 High</p> <p>— Chemotherapy — Pembrolizumab+Chemotherapy</p> <p>Hazard ratio (95%-CI)<br/>Pembrolizumab+Chemotherapy vs Chemo: 0.574 (0.437-0.753), p &lt; 0.001</p> <table border="1"> <tr> <td>143</td><td>124</td><td>99</td><td>70</td><td>48</td><td>34</td><td>24</td><td>15</td><td>10</td><td>4</td><td>1</td> </tr> <tr> <td>143</td><td>134</td><td>119</td><td>96</td><td>78</td><td>61</td><td>51</td><td>29</td><td>16</td><td>7</td><td>3</td> </tr> </table>          | 143 | 124 | 99  | 70  | 48  | 34 | 24 | 15 | 10 | 4 | 1 | 143 | 134 | 119 | 96  | 78  | 61  | 51 | 29 | 16 | 7 | 3 |
| 143                                                      | 124                                                                                                                                                                                                                                                                                                                                                                                                                                                                                                                                                                                                                                                                                                                        | 99                                                                                                                                                                                                                                                                                                                                                                                                                                                                                                   | 70  | 48  | 34  | 24  | 15  | 10 | 4  | 1  |    |   |   |     |     |     |     |     |     |    |    |    |   |   |
| 143                                                      | 134                                                                                                                                                                                                                                                                                                                                                                                                                                                                                                                                                                                                                                                                                                                        | 119                                                                                                                                                                                                                                                                                                                                                                                                                                                                                                  | 96  | 78  | 61  | 51  | 29  | 16 | 7  | 3  |    |   |   |     |     |     |     |     |     |    |    |    |   |   |
| <p><b>ORIENT15, overall survival, overall cohort</b></p> | <p>The original figure may be found in the primary trial manuscript</p> <p>Lu Z, Wang J, Shu Y, Liu L, Kong L, Yang L, Wang B, Sun G, Ji Y, Cao G, Liu H, Cui T, Li N, Qiu W, Li G, Hou X, Luo H, Xue L, Zhang Y, Yue W, Liu Z, Wang X, Gao S, Pan Y, Galais MP, Zaanani A, Ma Z, Li H, Wang Y, Shen L; ORIENT-15 study group. Sintilimab versus placebo in combination with chemotherapy as first line treatment for locally advanced or metastatic oesophageal squamous cell carcinoma (ORIENT-15): multicentre, randomised, double blind, phase 3 trial. <i>BMJ</i>. 2022 Apr 19;377:e068714. doi: 10.1136/bmj-2021-068714. PMID: 35440464; PMCID: PMC9016493.</p> <p>Figure 2 (top)</p>                                | <p>ORIENT15 OS Overall</p> <p>— Strata — Chemotherapy — Sintilimab+Chemotherapy</p> <p>Hazard ratio (95%-CI)<br/>Sintilimab+Chemotherapy vs Chemo: 0.629 (0.508-0.778), p &lt; 0.001</p> <table border="1"> <tr> <td>332</td><td>300</td><td>258</td><td>202</td><td>127</td><td>88</td><td>45</td><td>17</td><td>6</td><td>0</td><td>0</td> </tr> <tr> <td>327</td><td>305</td><td>283</td><td>240</td><td>161</td><td>105</td><td>52</td><td>25</td><td>11</td><td>2</td><td>0</td> </tr> </table> | 332 | 300 | 258 | 202 | 127 | 88 | 45 | 17 | 6  | 0 | 0 | 327 | 305 | 283 | 240 | 161 | 105 | 52 | 25 | 11 | 2 | 0 |
| 332                                                      | 300                                                                                                                                                                                                                                                                                                                                                                                                                                                                                                                                                                                                                                                                                                                        | 258                                                                                                                                                                                                                                                                                                                                                                                                                                                                                                  | 202 | 127 | 88  | 45  | 17  | 6  | 0  | 0  |    |   |   |     |     |     |     |     |     |    |    |    |   |   |
| 327                                                      | 305                                                                                                                                                                                                                                                                                                                                                                                                                                                                                                                                                                                                                                                                                                                        | 283                                                                                                                                                                                                                                                                                                                                                                                                                                                                                                  | 240 | 161 | 105 | 52  | 25  | 11 | 2  | 0  |    |   |   |     |     |     |     |     |     |    |    |    |   |   |

**ORIENT15,  
overall  
survival,  
CPS≥10**

The original figure may be found in the primary trial manuscript

Lu Z, Wang J, Shu Y, Liu L, Kong L, Yang L, Wang B, Sun G, Ji Y, Cao G, Liu H, Cui T, Li N, Qiu W, Li G, Hou X, Luo H, Xue L, Zhang Y, Yue W, Liu Z, Wang X, Gao S, Pan Y, Galais MP, Zaanan A, Ma Z, Li H, Wang Y, Shen L; ORIENT-15 study group. Sintilimab versus placebo in combination with chemotherapy as first line treatment for locally advanced or metastatic oesophageal squamous cell carcinoma (ORIENT-15): multicentre, randomised, double blind, phase 3 trial. *BMJ*. 2022 Apr 19;377:e068714. doi: 10.1136/bmj-2021-068714. PMID: 35440464; PMCID: PMC9016493.

Figure 2 (bottom)

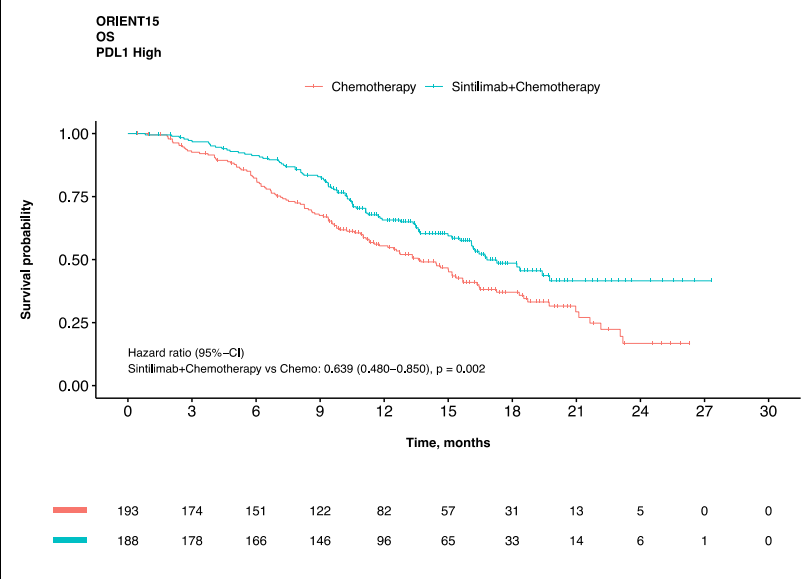

**ORIENT15,  
Progression  
Free Survival,  
Overall cohort**

The original figure may be found in the primary trial manuscript

Lu Z, Wang J, Shu Y, Liu L, Kong L, Yang L, Wang B, Sun G, Ji Y, Cao G, Liu H, Cui T, Li N, Qiu W, Li G, Hou X, Luo H, Xue L, Zhang Y, Yue W, Liu Z, Wang X, Gao S, Pan Y, Galais MP, Zaanan A, Ma Z, Li H, Wang Y, Shen L; ORIENT-15 study group. Sintilimab versus placebo in combination with chemotherapy as first line treatment for locally advanced or metastatic oesophageal squamous cell carcinoma (ORIENT-15): multicentre, randomised, double blind, phase 3 trial. *BMJ*. 2022 Apr 19;377:e068714. doi: 10.1136/bmj-2021-068714. PMID: 35440464; PMCID: PMC9016493.

Figure 4 (top)

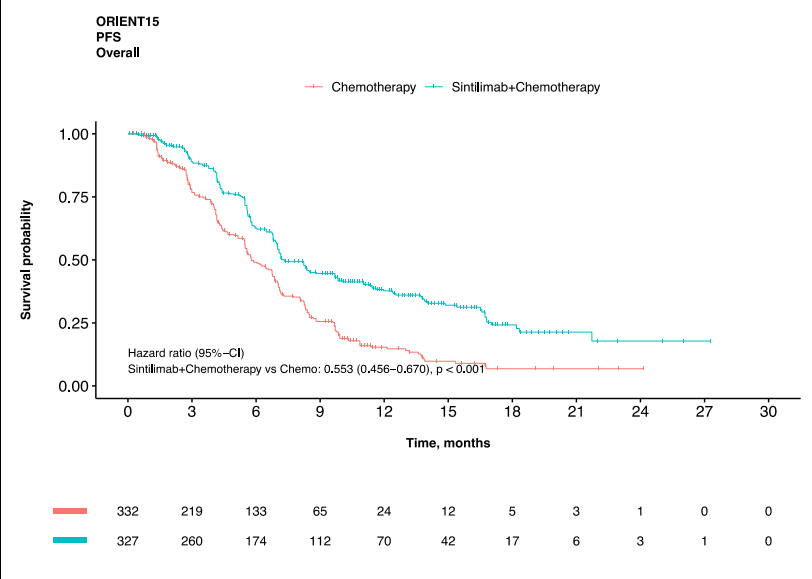

|                                                           |                                                                                                                                                                                                                                                                                                                                                                                                                                                                                                                                                                                                                                                                                                |                                                                                                                                                                                                                                                                                                                                                                 |     |     |    |    |    |   |   |   |   |   |   |     |     |     |     |     |    |    |    |   |   |   |   |   |   |   |
|-----------------------------------------------------------|------------------------------------------------------------------------------------------------------------------------------------------------------------------------------------------------------------------------------------------------------------------------------------------------------------------------------------------------------------------------------------------------------------------------------------------------------------------------------------------------------------------------------------------------------------------------------------------------------------------------------------------------------------------------------------------------|-----------------------------------------------------------------------------------------------------------------------------------------------------------------------------------------------------------------------------------------------------------------------------------------------------------------------------------------------------------------|-----|-----|----|----|----|---|---|---|---|---|---|-----|-----|-----|-----|-----|----|----|----|---|---|---|---|---|---|---|
| <p><b>ORIENT15, Progression Free Survival, TPS ≥1</b></p> | <p>The original figure may be found in the primary trial manuscript</p> <p>Lu Z, Wang J, Shu Y, Liu L, Kong L, Yang L, Wang B, Sun G, Ji Y, Cao G, Liu H, Cui T, Li N, Qiu W, Li G, Hou X, Luo H, Xue L, Zhang Y, Yue W, Liu Z, Wang X, Gao S, Pan Y, Galais MP, Zaanani A, Ma Z, Li H, Wang Y, Shen L; ORIENT-15 study group. Sintilimab versus placebo in combination with chemotherapy as first line treatment for locally advanced or metastatic oesophageal squamous cell carcinoma (ORIENT-15): multicentre, randomised, double blind, phase 3 trial. <i>BMJ</i>. 2022 Apr 19;377:e068714. doi: 10.1136/bmj-2021-068714. PMID: 35440464; PMCID: PMC9016493.</p> <p>Figure 4 (bottom)</p> | <table border="1"> <tr> <td>193</td> <td>131</td> <td>80</td> <td>39</td> <td>16</td> <td>9</td> <td>4</td> <td>3</td> <td>1</td> <td>0</td> <td>0</td> </tr> <tr> <td>188</td> <td>150</td> <td>104</td> <td>66</td> <td>46</td> <td>24</td> <td>11</td> <td>4</td> <td>2</td> <td>1</td> <td>0</td> </tr> </table>                                            | 193 | 131 | 80 | 39 | 16 | 9 | 4 | 3 | 1 | 0 | 0 | 188 | 150 | 104 | 66  | 46  | 24 | 11 | 4  | 2 | 1 | 0 |   |   |   |   |
| 193                                                       | 131                                                                                                                                                                                                                                                                                                                                                                                                                                                                                                                                                                                                                                                                                            | 80                                                                                                                                                                                                                                                                                                                                                              | 39  | 16  | 9  | 4  | 3  | 1 | 0 | 0 |   |   |   |     |     |     |     |     |    |    |    |   |   |   |   |   |   |   |
| 188                                                       | 150                                                                                                                                                                                                                                                                                                                                                                                                                                                                                                                                                                                                                                                                                            | 104                                                                                                                                                                                                                                                                                                                                                             | 66  | 46  | 24 | 11 | 4  | 2 | 1 | 0 |   |   |   |     |     |     |     |     |    |    |    |   |   |   |   |   |   |   |
| <p><b>ORIENT15, DOR, Overall cohort</b></p>               | <p>The original figure may be found in the primary trial manuscript</p> <p>Lu Z, Wang J, Shu Y, Liu L, Kong L, Yang L, Wang B, Sun G, Ji Y, Cao G, Liu H, Cui T, Li N, Qiu W, Li G, Hou X, Luo H, Xue L, Zhang Y, Yue W, Liu Z, Wang X, Gao S, Pan Y, Galais MP, Zaanani A, Ma Z, Li H, Wang Y, Shen L; ORIENT-15 study group. Sintilimab versus placebo in combination with chemotherapy as first line treatment for locally advanced or metastatic oesophageal squamous cell carcinoma (ORIENT-15): multicentre, randomised, double blind, phase 3 trial. <i>BMJ</i>. 2022 Apr 19;377:e068714. doi: 10.1136/bmj-2021-068714. PMID: 35440464; PMCID: PMC9016493.</p> <p>Figure S2</p>         | <table border="1"> <tr> <td>151</td> <td>128</td> <td>76</td> <td>32</td> <td>17</td> <td>8</td> <td>5</td> <td>2</td> <td>0</td> <td>0</td> <td>0</td> <td>0</td> <td>0</td> </tr> <tr> <td>216</td> <td>181</td> <td>119</td> <td>84</td> <td>58</td> <td>36</td> <td>8</td> <td>3</td> <td>1</td> <td>0</td> <td>0</td> <td>0</td> <td>0</td> </tr> </table> | 151 | 128 | 76 | 32 | 17 | 8 | 5 | 2 | 0 | 0 | 0 | 0   | 0   | 216 | 181 | 119 | 84 | 58 | 36 | 8 | 3 | 1 | 0 | 0 | 0 | 0 |
| 151                                                       | 128                                                                                                                                                                                                                                                                                                                                                                                                                                                                                                                                                                                                                                                                                            | 76                                                                                                                                                                                                                                                                                                                                                              | 32  | 17  | 8  | 5  | 2  | 0 | 0 | 0 | 0 | 0 |   |     |     |     |     |     |    |    |    |   |   |   |   |   |   |   |
| 216                                                       | 181                                                                                                                                                                                                                                                                                                                                                                                                                                                                                                                                                                                                                                                                                            | 119                                                                                                                                                                                                                                                                                                                                                             | 84  | 58  | 36 | 8  | 3  | 1 | 0 | 0 | 0 | 0 |   |     |     |     |     |     |    |    |    |   |   |   |   |   |   |   |

|                                                                      |                                                                                                                                                                                                                                                                                                                                                                                                                                                                                                                                                                                                                                                                                            |                                                                                                                                                                                                                                                                                                                                        |     |     |     |    |    |    |    |    |   |   |   |     |     |     |     |    |    |    |    |    |   |   |   |   |
|----------------------------------------------------------------------|--------------------------------------------------------------------------------------------------------------------------------------------------------------------------------------------------------------------------------------------------------------------------------------------------------------------------------------------------------------------------------------------------------------------------------------------------------------------------------------------------------------------------------------------------------------------------------------------------------------------------------------------------------------------------------------------|----------------------------------------------------------------------------------------------------------------------------------------------------------------------------------------------------------------------------------------------------------------------------------------------------------------------------------------|-----|-----|-----|----|----|----|----|----|---|---|---|-----|-----|-----|-----|----|----|----|----|----|---|---|---|---|
| <p><b>ORIENT15,<br/>DOR, TPS ≥1</b></p>                              | <p>The original figure may be found in the primary trial manuscript</p> <p>Lu Z, Wang J, Shu Y, Liu L, Kong L, Yang L, Wang B, Sun G, Ji Y, Cao G, Liu H, Cui T, Li N, Qiu W, Li G, Hou X, Luo H, Xue L, Zhang Y, Yue W, Liu Z, Wang X, Gao S, Pan Y, Galais MP, Zaanan A, Ma Z, Li H, Wang Y, Shen L; ORIENT-15 study group. Sintilimab versus placebo in combination with chemotherapy as first line treatment for locally advanced or metastatic oesophageal squamous cell carcinoma (ORIENT-15): multicentre, randomised, double blind, phase 3 trial. <i>BMJ</i>. 2022 Apr 19;377:e068714. doi: 10.1136/bmj-2021-068714. PMID: 35440464; PMCID: PMC9016493.</p> <p>Figure S3</p>      | <table border="1"> <tr> <td>94</td> <td>79</td> <td>42</td> <td>21</td> <td>12</td> <td>7</td> <td>4</td> <td>2</td> <td>0</td> <td>0</td> <td>0</td> <td>0</td> </tr> <tr> <td>127</td> <td>105</td> <td>70</td> <td>48</td> <td>36</td> <td>20</td> <td>5</td> <td>2</td> <td>1</td> <td>0</td> <td>0</td> <td>0</td> </tr> </table> | 94  | 79  | 42  | 21 | 12 | 7  | 4  | 2  | 0 | 0 | 0 | 0   | 127 | 105 | 70  | 48 | 36 | 20 | 5  | 2  | 1 | 0 | 0 | 0 |
| 94                                                                   | 79                                                                                                                                                                                                                                                                                                                                                                                                                                                                                                                                                                                                                                                                                         | 42                                                                                                                                                                                                                                                                                                                                     | 21  | 12  | 7   | 4  | 2  | 0  | 0  | 0  | 0 |   |   |     |     |     |     |    |    |    |    |    |   |   |   |   |
| 127                                                                  | 105                                                                                                                                                                                                                                                                                                                                                                                                                                                                                                                                                                                                                                                                                        | 70                                                                                                                                                                                                                                                                                                                                     | 48  | 36  | 20  | 5  | 2  | 1  | 0  | 0  | 0 |   |   |     |     |     |     |    |    |    |    |    |   |   |   |   |
| <p><b>RATIONALE302,<br/>overall survival,<br/>overall cohort</b></p> | <p>The original figure may be found in the primary trial manuscript</p> <p>Shen L, Kato K, Kim SB, Ajani JA, Zhao K, He Z, Yu X, Shu Y, Luo Q, Wang J, Chen Z, Niu Z, Zhang L, Yi T, Sun JM, Chen J, Yu G, Lin CY, Hara H, Bi Q, Satoh T, Pazo-Cid R, Arkenau HT, Borg C, Lordick F, Li L, Ding N, Tao A, Shi J, Van Cutsem E; RATIONALE-302 Investigators. Tislelizumab Versus Chemotherapy as Second-Line Treatment for Advanced or Metastatic Esophageal Squamous Cell Carcinoma (RATIONALE-302): A Randomized Phase III Study. <i>J Clin Oncol</i>. 2022 Sep 10;40(26):3065-3076. doi: 10.1200/JCO.21.01926. Epub 2022 Apr 20. PMID: 35442766; PMCID: PMC9462531.</p> <p>Figure 2A</p> | <table border="1"> <tr> <td>256</td> <td>189</td> <td>123</td> <td>82</td> <td>50</td> <td>33</td> <td>21</td> <td>11</td> <td>5</td> <td>2</td> <td>1</td> </tr> <tr> <td>256</td> <td>213</td> <td>157</td> <td>120</td> <td>88</td> <td>63</td> <td>44</td> <td>25</td> <td>13</td> <td>8</td> <td>2</td> </tr> </table>            | 256 | 189 | 123 | 82 | 50 | 33 | 21 | 11 | 5 | 2 | 1 | 256 | 213 | 157 | 120 | 88 | 63 | 44 | 25 | 13 | 8 | 2 |   |   |
| 256                                                                  | 189                                                                                                                                                                                                                                                                                                                                                                                                                                                                                                                                                                                                                                                                                        | 123                                                                                                                                                                                                                                                                                                                                    | 82  | 50  | 33  | 21 | 11 | 5  | 2  | 1  |   |   |   |     |     |     |     |    |    |    |    |    |   |   |   |   |
| 256                                                                  | 213                                                                                                                                                                                                                                                                                                                                                                                                                                                                                                                                                                                                                                                                                        | 157                                                                                                                                                                                                                                                                                                                                    | 120 | 88  | 63  | 44 | 25 | 13 | 8  | 2  |   |   |   |     |     |     |     |    |    |    |    |    |   |   |   |   |

**RATIONALE302,  
overall survival,  
TAP $\geq$ 10**

The original figure may be found in the primary trial manuscript

Shen L, Kato K, Kim SB, Ajani JA, Zhao K, He Z, Yu X, Shu Y, Luo Q, Wang J, Chen Z, Niu Z, Zhang L, Yi T, Sun JM, Chen J, Yu G, Lin CY, Hara H, Bi Q, Satoh T, Pazo-Cid R, Arkenau HT, Borg C, Lordick F, Li L, Ding N, Tao A, Shi J, Van Cutsem E; RATIONALE-302 Investigators. Tislelizumab Versus Chemotherapy as Second-Line Treatment for Advanced or Metastatic Esophageal Squamous Cell Carcinoma (RATIONALE-302): A Randomized Phase III Study. *J Clin Oncol.* 2022 Sep 10;40(26):3065-3076. doi: 10.1200/JCO.21.01926. Epub 2022 Apr 20. PMID: 35442766; PMCID: PMC9462531.

Figure 2B

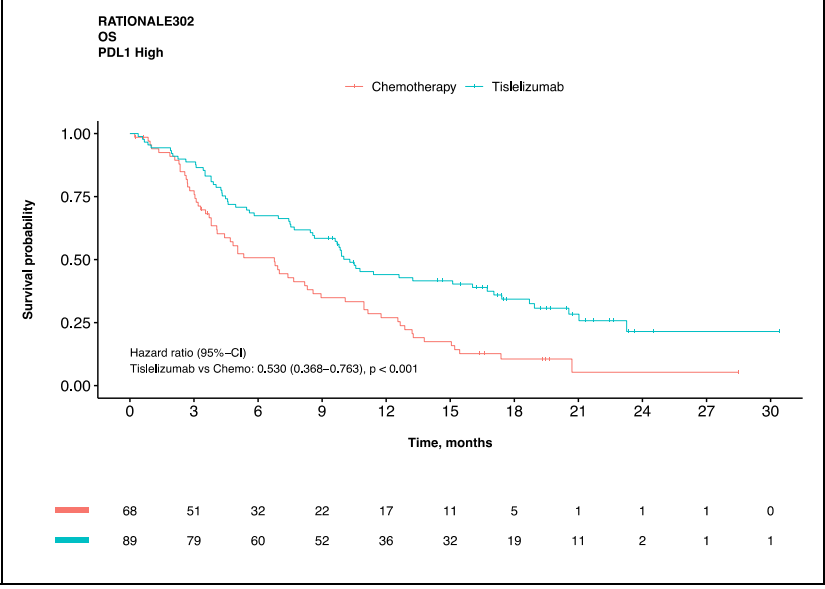

Abbreviations: CPS, combined positive score; TPS, tumor proportion score; Chemo, chemotherapy; Immuno, immunotherapy; Nivo, nivolumab; Ipi, ipilimumab; Camre, camrelizumab; Pembro, pembrolizumab; Sinti, sintilimab; Tisle, Tislelizumab; HR, hazard ratio; CI, confidence interval; PD-L1, programmed death ligand 1

eFigure 4. Example Comparisons of KMSubtraction Outcomes With Reported HRs for PD-L1–Low Subgroups

| Trial, comparison                                     | PD-L1 expression subgroup | Outcome | Reported              |         | KMSubtraction with bipartite matching                                                                                                                                                                                                                                                                                                                                                                                                                                                                          |     |     |     |    |    |    |    |   |   |   |   |     |     |     |    |    |    |    |    |   |   |   |
|-------------------------------------------------------|---------------------------|---------|-----------------------|---------|----------------------------------------------------------------------------------------------------------------------------------------------------------------------------------------------------------------------------------------------------------------------------------------------------------------------------------------------------------------------------------------------------------------------------------------------------------------------------------------------------------------|-----|-----|-----|----|----|----|----|---|---|---|---|-----|-----|-----|----|----|----|----|----|---|---|---|
|                                                       |                           |         | Hazard ratio (95%-CI) | p-value | Curve, hazard ratio (95%-CI)                                                                                                                                                                                                                                                                                                                                                                                                                                                                                   |     |     |     |    |    |    |    |   |   |   |   |     |     |     |    |    |    |    |    |   |   |   |
| <i>ORIENT15 (Esophageal squamous cell carcinoma)</i>  |                           |         |                       |         |                                                                                                                                                                                                                                                                                                                                                                                                                                                                                                                |     |     |     |    |    |    |    |   |   |   |   |     |     |     |    |    |    |    |    |   |   |   |
| Sintilimab + Chemotherapy (139) vs Chemotherapy (139) | CPS < 10                  | OS      | 0.62 (0.45-0.85)      | NR      | <p>ORIENT15<br/>OS<br/>PDL1 low</p> <p>— Chemotherapy — Sintilimab+Chemotherapy</p> <p>Hazard ratio (95%-CI)<br/>Sintilimab+Chemotherapy vs Chemo: 0.618 (0.448-0.851), p = 0.003</p> <table border="1"> <tr> <td>139</td> <td>125</td> <td>107</td> <td>80</td> <td>45</td> <td>30</td> <td>14</td> <td>4</td> <td>1</td> <td>0</td> <td>0</td> </tr> <tr> <td>139</td> <td>127</td> <td>117</td> <td>94</td> <td>65</td> <td>39</td> <td>19</td> <td>11</td> <td>5</td> <td>1</td> <td>0</td> </tr> </table> | 139 | 125 | 107 | 80 | 45 | 30 | 14 | 4 | 1 | 0 | 0 | 139 | 127 | 117 | 94 | 65 | 39 | 19 | 11 | 5 | 1 | 0 |
| 139                                                   | 125                       | 107     | 80                    | 45      | 30                                                                                                                                                                                                                                                                                                                                                                                                                                                                                                             | 14  | 4   | 1   | 0  | 0  |    |    |   |   |   |   |     |     |     |    |    |    |    |    |   |   |   |
| 139                                                   | 127                       | 117     | 94                    | 65      | 39                                                                                                                                                                                                                                                                                                                                                                                                                                                                                                             | 19  | 11  | 5   | 1  | 0  |    |    |   |   |   |   |     |     |     |    |    |    |    |    |   |   |   |

**Checkmate-648 (Esophageal squamous cell carcinoma)**

|                     |        |    |                  |    |
|---------------------|--------|----|------------------|----|
| Nivo+Chemo vs Chemo | TPS <1 | OS | 0.98 (0.76-1.28) | NR |
| Nivo+Ipi vs Chemo   | TPS <1 | OS | 0.96 (0.74-1.25) | NR |

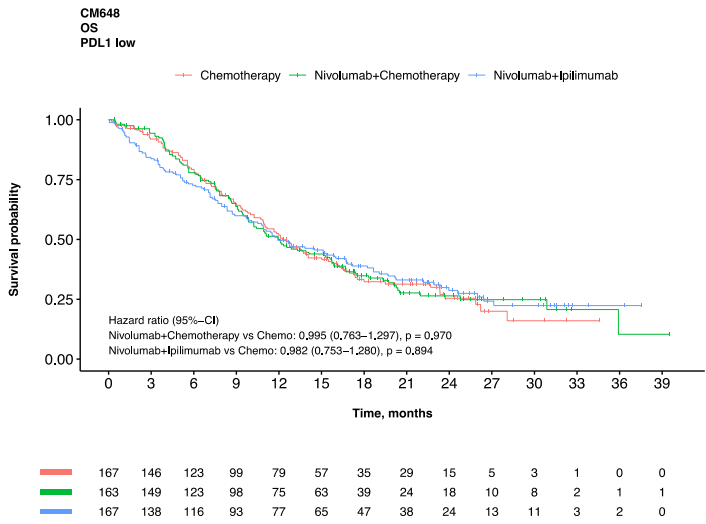

**KN590**

|                         |          |    |                  |    |
|-------------------------|----------|----|------------------|----|
| Pembro + Chemo vs Chemo | CPS < 10 | OS | 0.99 (0.74-1.32) | HR |
|-------------------------|----------|----|------------------|----|

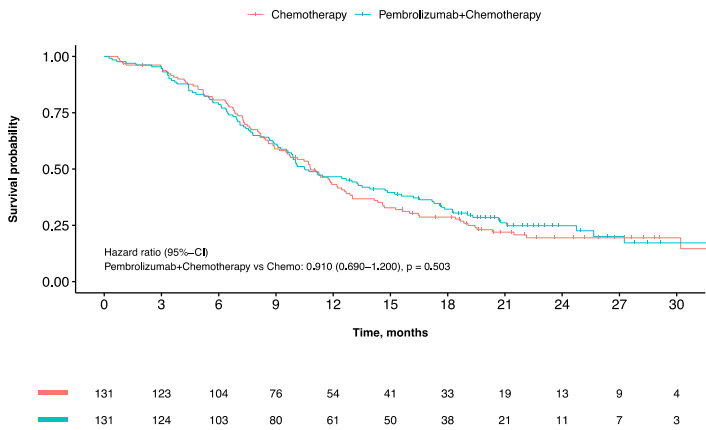

**ESCORT**

|                 |         |    |                  |    |                                                                                                                                                                                                                                                                                                                                                      |     |    |    |    |    |    |    |   |   |     |     |     |    |    |    |    |    |    |    |   |   |   |
|-----------------|---------|----|------------------|----|------------------------------------------------------------------------------------------------------------------------------------------------------------------------------------------------------------------------------------------------------------------------------------------------------------------------------------------------------|-----|----|----|----|----|----|----|---|---|-----|-----|-----|----|----|----|----|----|----|----|---|---|---|
| Camre vs Chemo  | TPS <1  | OS | 0.82 (0.62-1.09) | NR | <table border="1" data-bbox="1344 574 1993 638"> <tr> <td>122</td> <td>99</td> <td>63</td> <td>37</td> <td>27</td> <td>14</td> <td>6</td> <td>3</td> <td>0</td> </tr> <tr> <td>135</td> <td>112</td> <td>76</td> <td>56</td> <td>36</td> <td>18</td> <td>9</td> <td>2</td> <td>0</td> </tr> </table>                                                 | 122 | 99 | 63 | 37 | 27 | 14 | 6  | 3 | 0 | 135 | 112 | 76  | 56 | 36 | 18 | 9  | 2  | 0  |    |   |   |   |
| 122             | 99      | 63 | 37               | 27 | 14                                                                                                                                                                                                                                                                                                                                                   | 6   | 3  | 0  |    |    |    |    |   |   |     |     |     |    |    |    |    |    |    |    |   |   |   |
| 135             | 112     | 76 | 56               | 36 | 18                                                                                                                                                                                                                                                                                                                                                   | 9   | 2  | 0  |    |    |    |    |   |   |     |     |     |    |    |    |    |    |    |    |   |   |   |
| <b>KN181</b>    |         |    |                  |    |                                                                                                                                                                                                                                                                                                                                                      |     |    |    |    |    |    |    |   |   |     |     |     |    |    |    |    |    |    |    |   |   |   |
| Pembro vs Chemo | CPS <10 | OS | 0.88 (0.66-1.16) |    | <table border="1" data-bbox="1344 1101 1993 1165"> <tr> <td>121</td> <td>99</td> <td>75</td> <td>44</td> <td>32</td> <td>20</td> <td>12</td> <td>8</td> <td>5</td> <td>3</td> <td>1</td> </tr> <tr> <td>113</td> <td>88</td> <td>65</td> <td>46</td> <td>37</td> <td>25</td> <td>18</td> <td>12</td> <td>8</td> <td>5</td> <td>1</td> </tr> </table> | 121 | 99 | 75 | 44 | 32 | 20 | 12 | 8 | 5 | 3   | 1   | 113 | 88 | 65 | 46 | 37 | 25 | 18 | 12 | 8 | 5 | 1 |
| 121             | 99      | 75 | 44               | 32 | 20                                                                                                                                                                                                                                                                                                                                                   | 12  | 8  | 5  | 3  | 1  |    |    |   |   |     |     |     |    |    |    |    |    |    |    |   |   |   |
| 113             | 88      | 65 | 46               | 37 | 25                                                                                                                                                                                                                                                                                                                                                   | 18  | 12 | 8  | 5  | 1  |    |    |   |   |     |     |     |    |    |    |    |    |    |    |   |   |   |

Abbreviations: Sinti, Sintilimab; Nivo, nivolumab; Ipi, ipilimumab; Pembro, Pembrolizumab; Chemo, chemotherapy; CI, confidence interval; PD-L1, programmed death ligand 1 ESCC, esophageal squamous cell carcinoma; NR, not reported; TPS, tumor proportion score.



eFigure 5. Evaluation of KMSubtraction Bipartite Matching

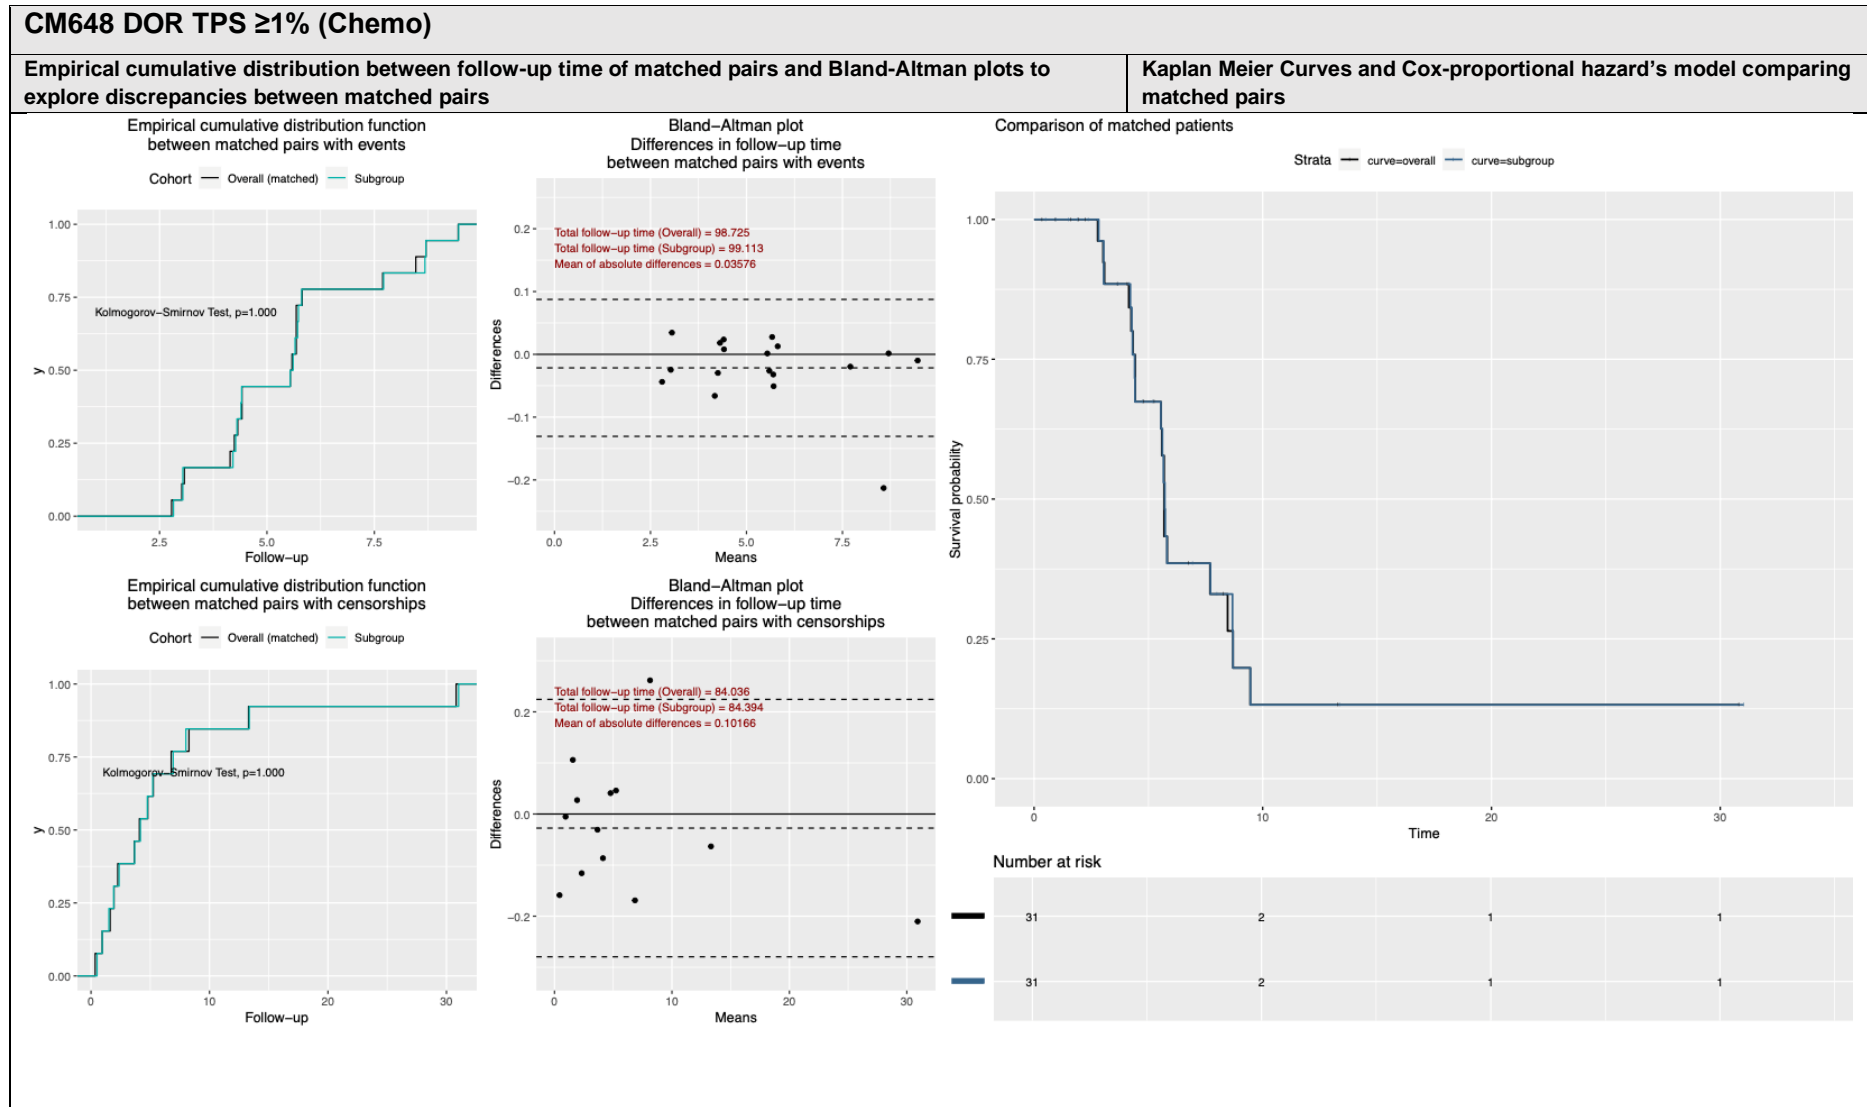

# CM648 DOR TPS $\geq 1\%$ (Nivo + Ipi)

Empirical cumulative distribution between follow-up time of matched pairs and Bland-Altman plots to explore discrepancies between matched pairs

Kaplan Meier Curves and Cox-proportional hazard's model comparing matched pairs

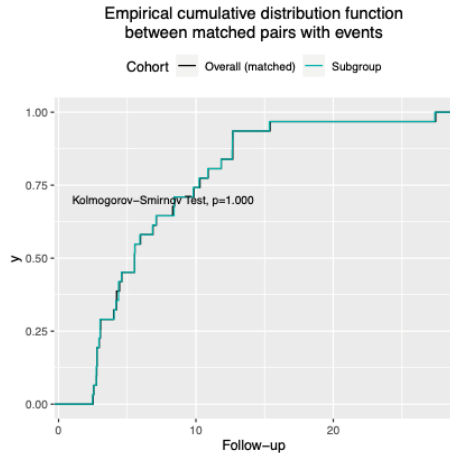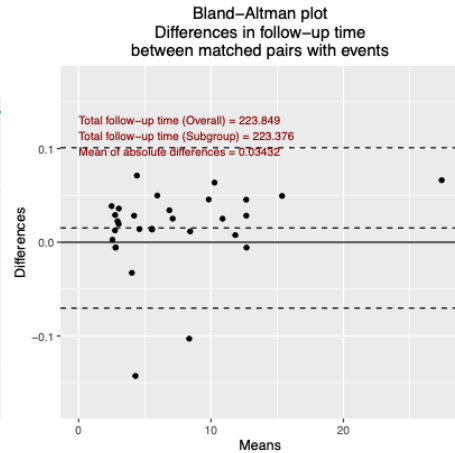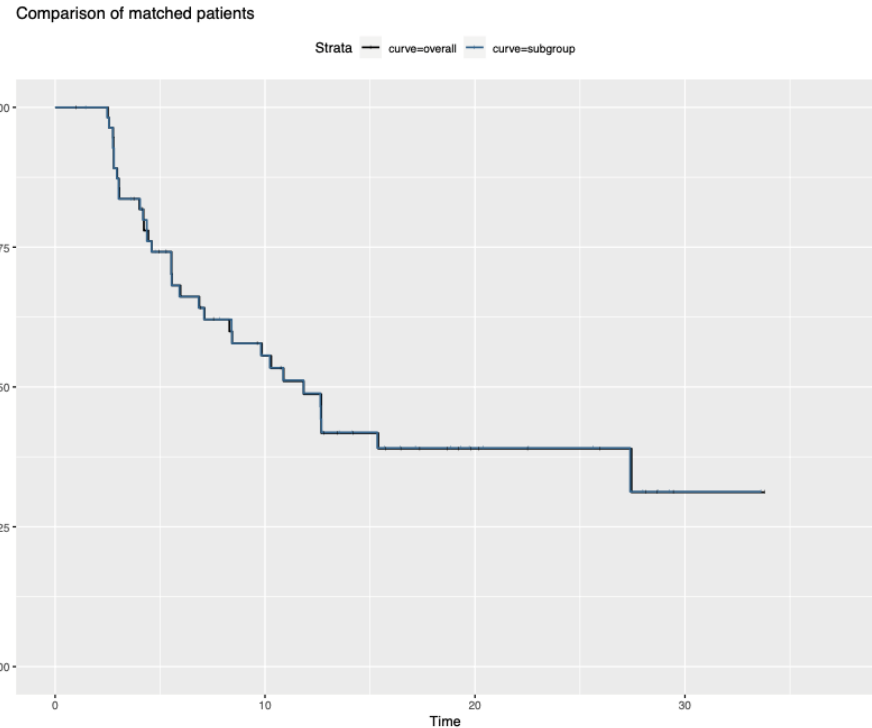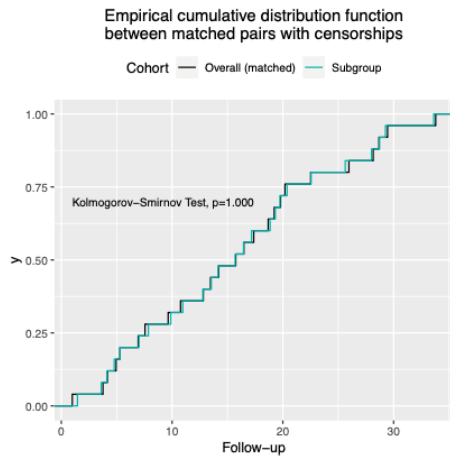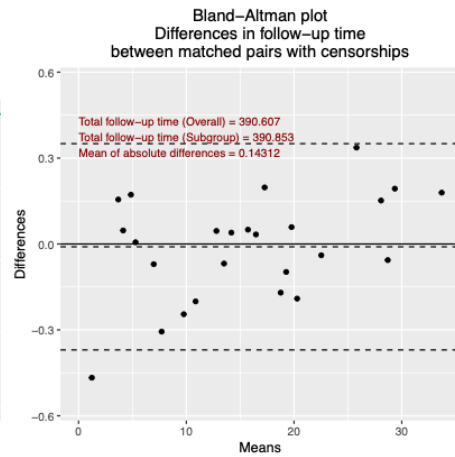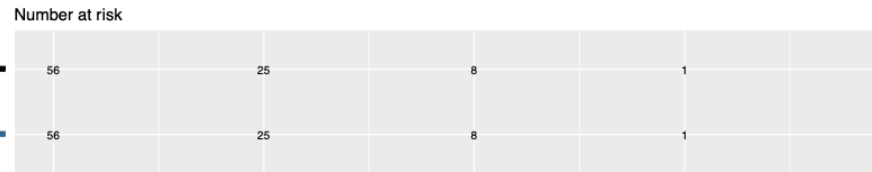

# CM648 DOR TPS $\geq 1\%$ (Nivo + Chemo)

Empirical cumulative distribution between follow-up time of matched pairs and Bland-Altman plots to explore discrepancies between matched pairs

Kaplan Meier Curves and Cox-proportional hazard's model comparing matched pairs

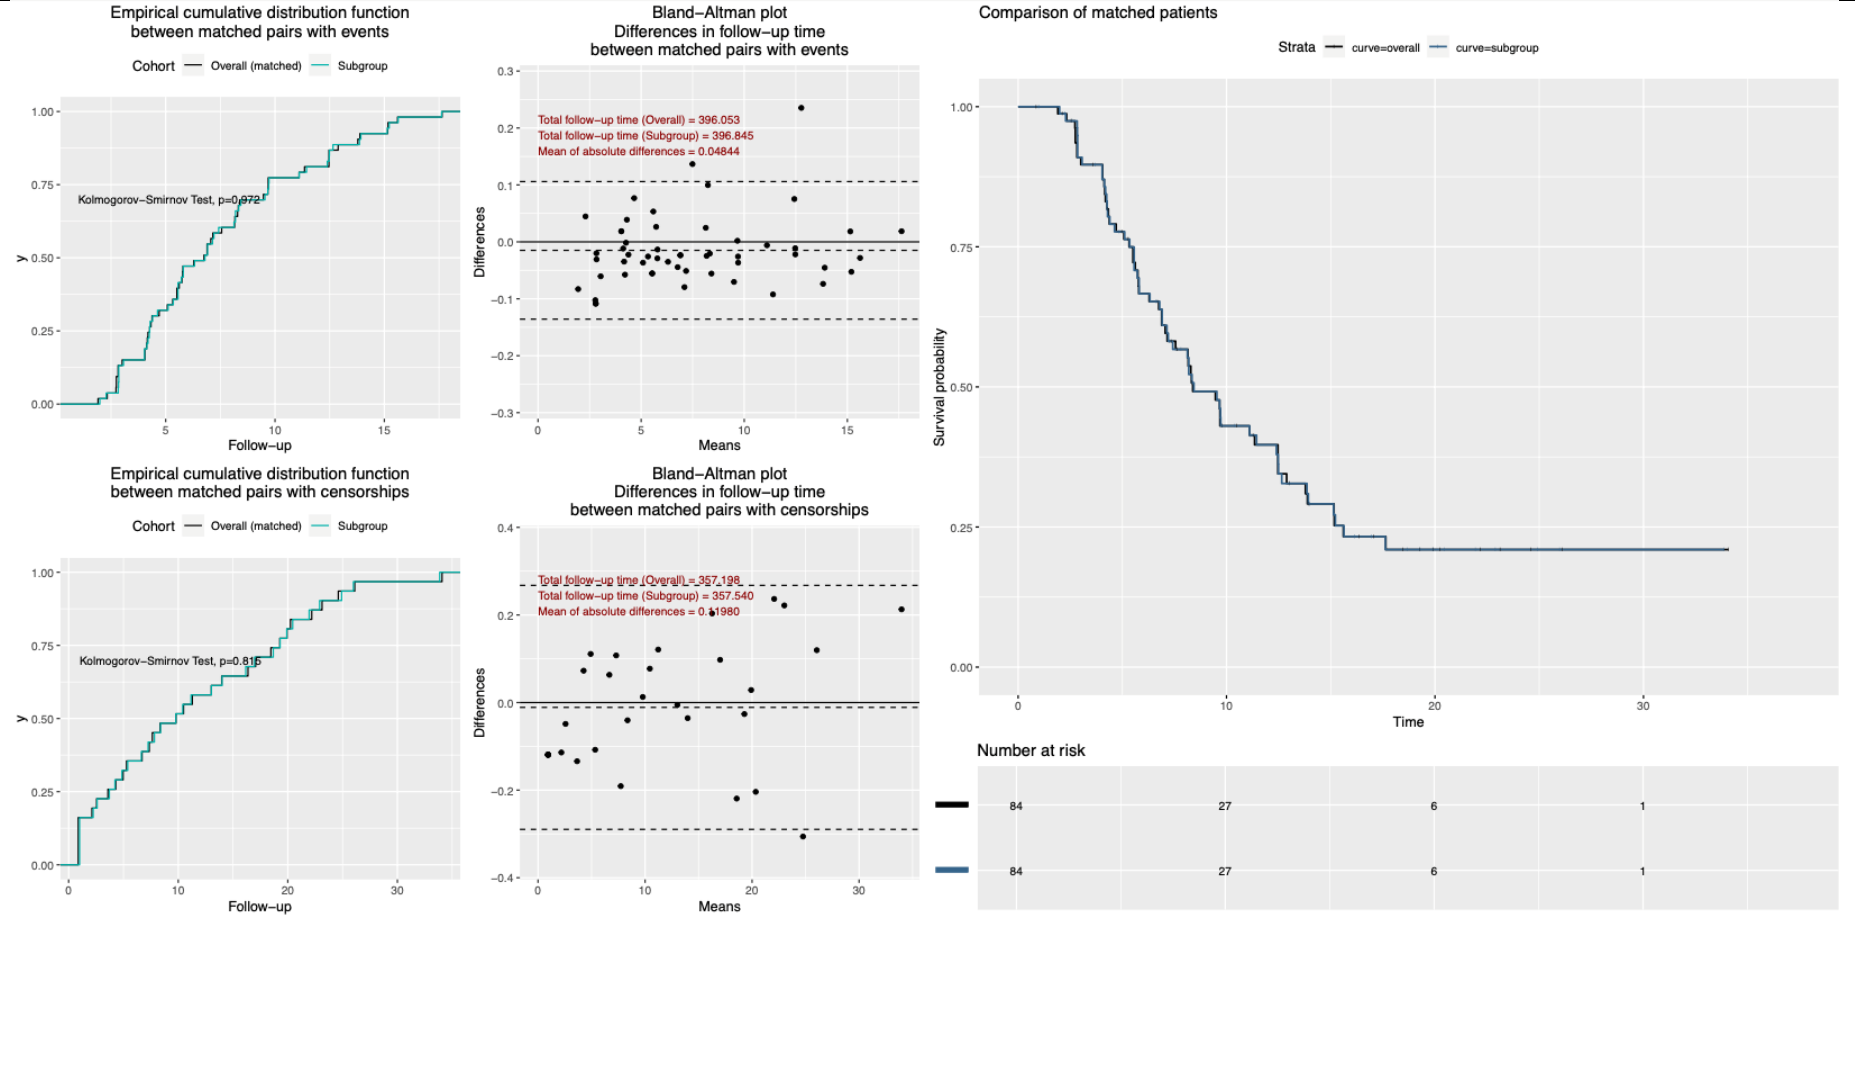

# CM648 OS TPS $\geq 1\%$ (Chemo)

Empirical cumulative distribution between follow-up time of matched pairs and Bland-Altman plots to explore discrepancies between matched pairs

Kaplan Meier Curves and Cox-proportional hazard's model comparing matched pairs

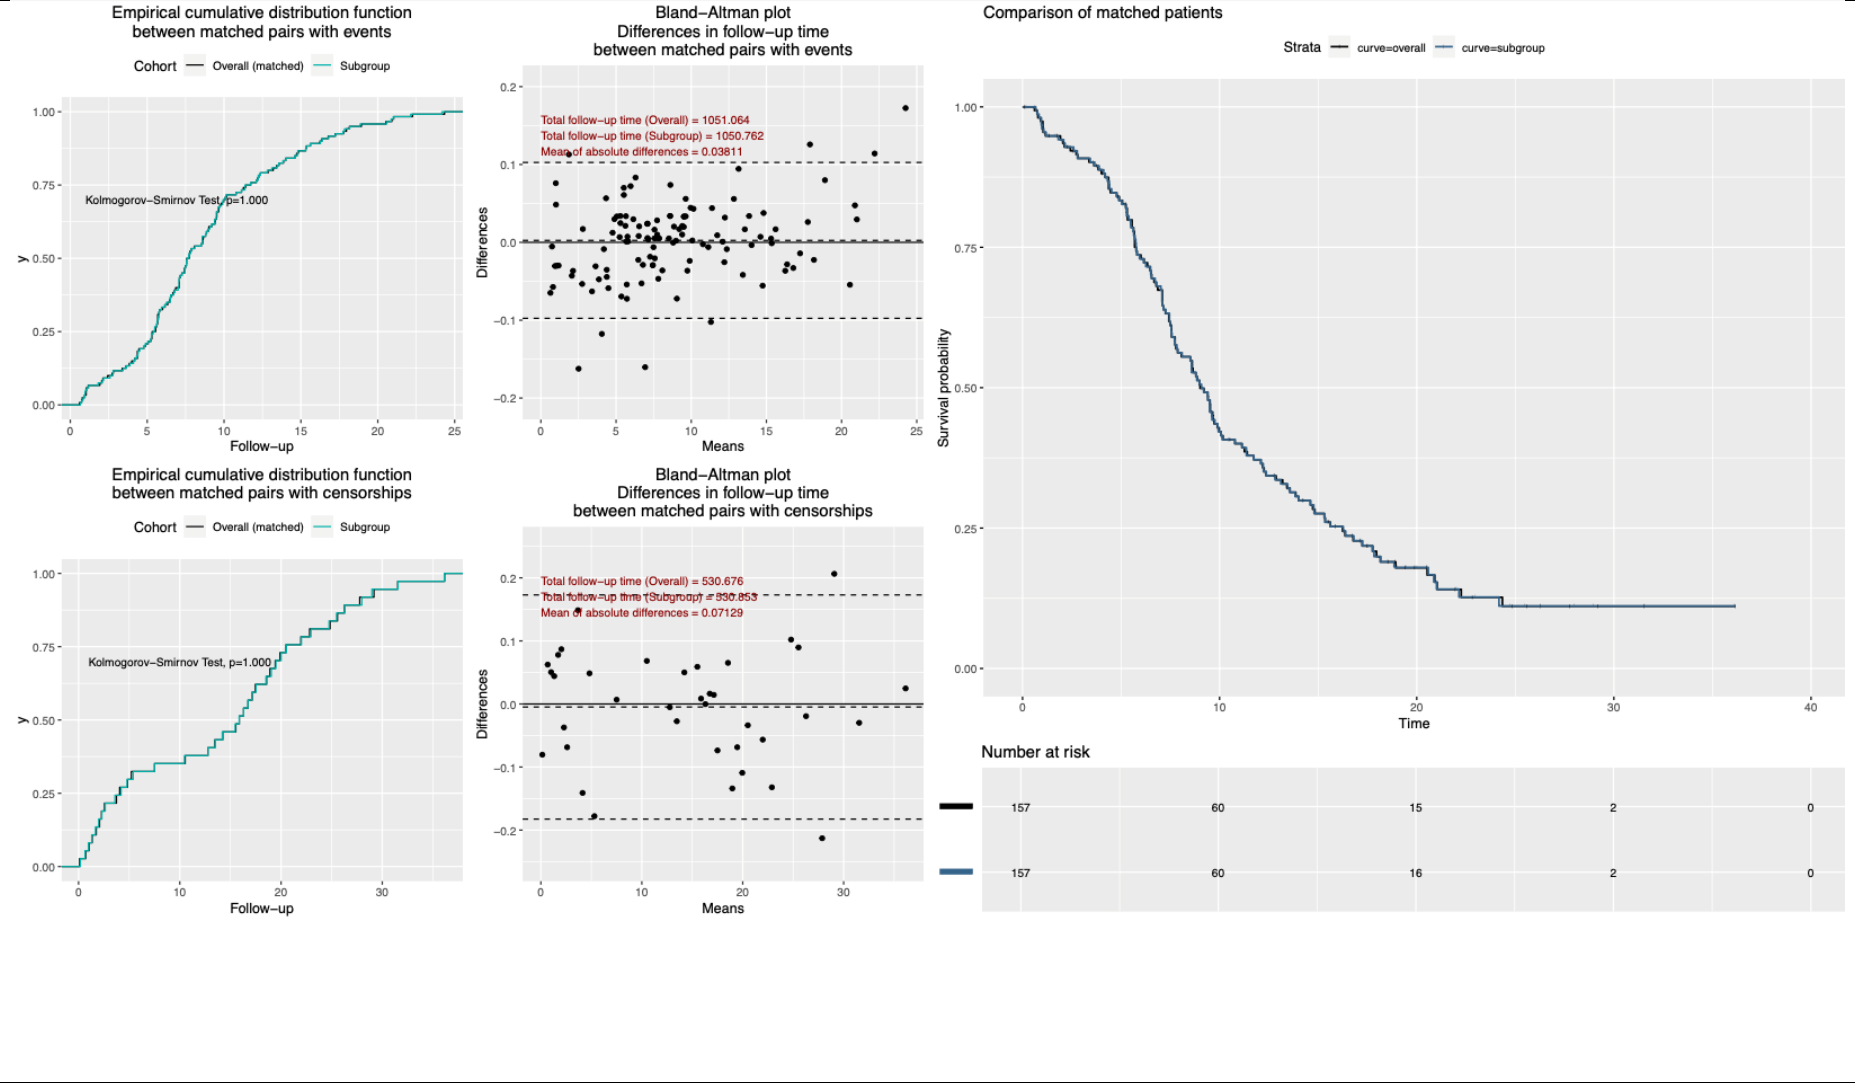

# CM648 OS TPS $\geq 1\%$ (Nivo + Ipi)

Empirical cumulative distribution between follow-up time of matched pairs and Bland-Altman plots to explore discrepancies between matched pairs

Kaplan Meier Curves and Cox-proportional hazard's model comparing matched pairs

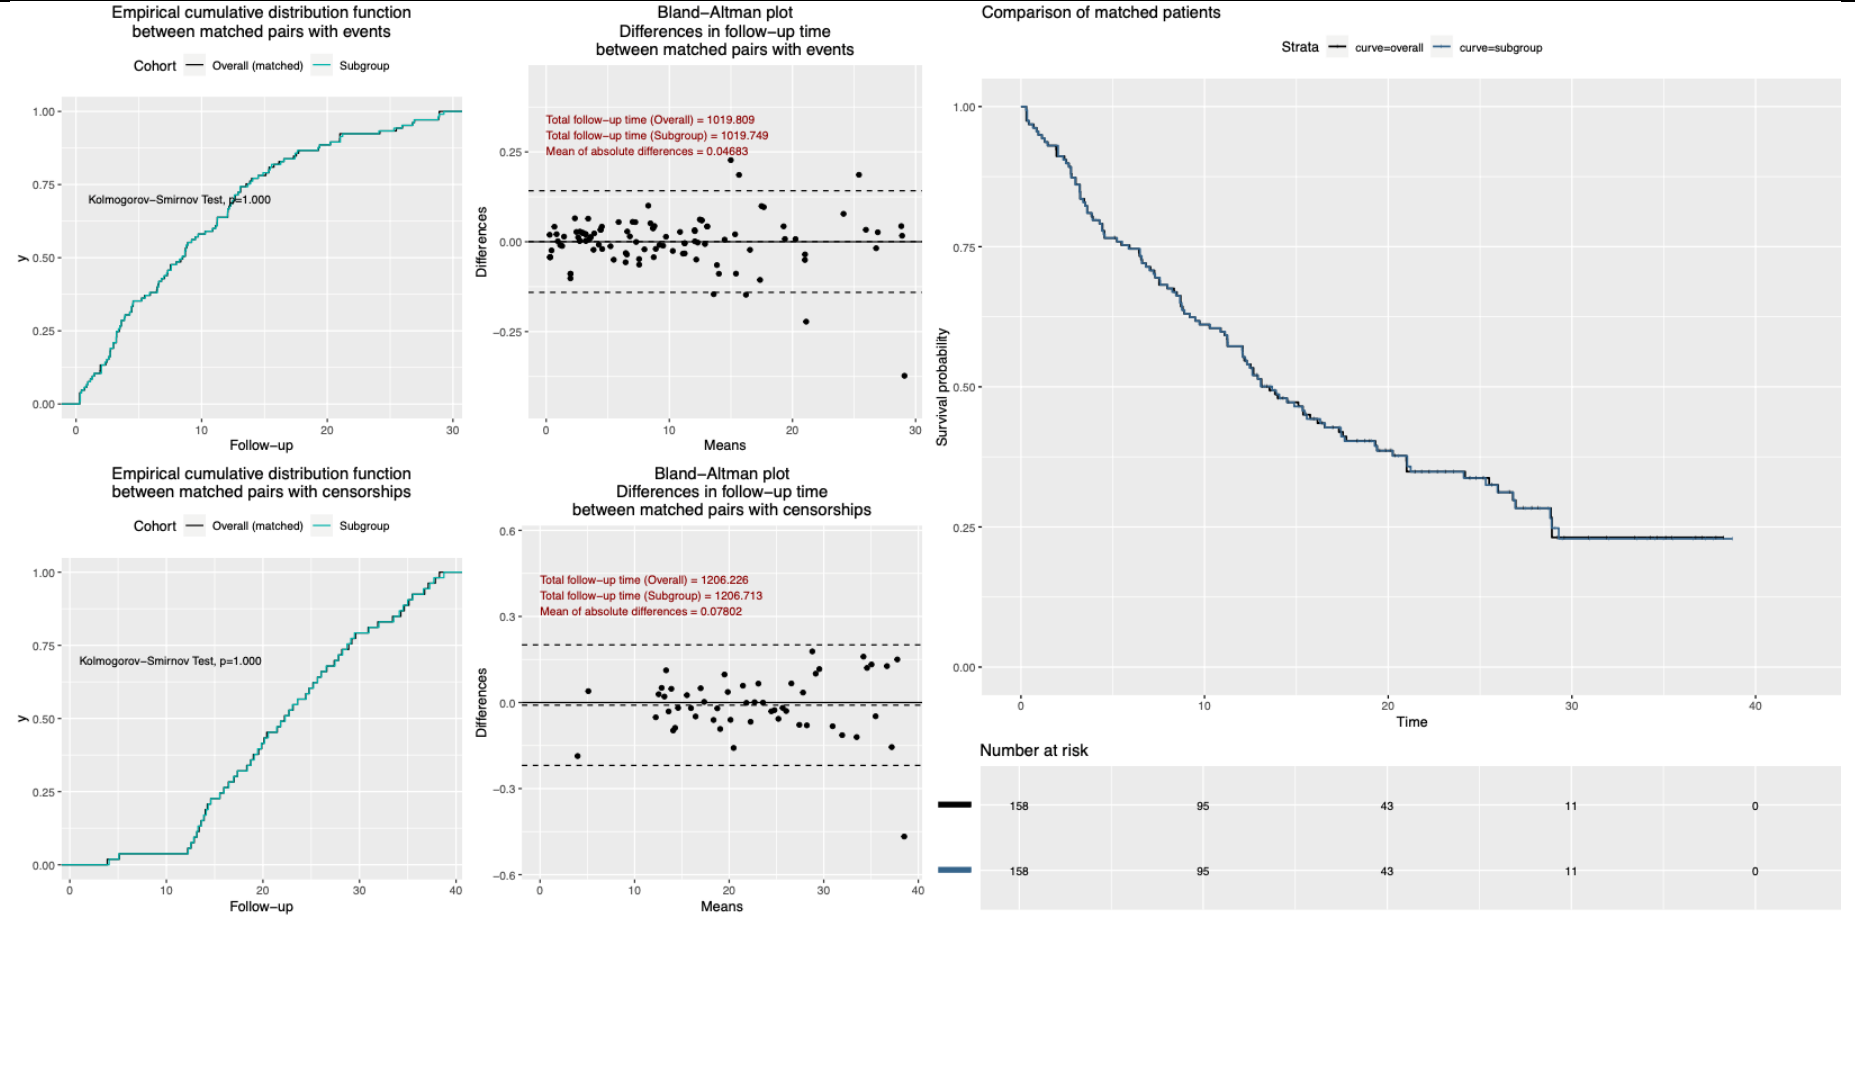

# CM648 OS TPS $\geq 1\%$ (Nivo + Chemo)

Empirical cumulative distribution between follow-up time of matched pairs and Bland-Altman plots to explore discrepancies between matched pairs

Kaplan Meier Curves and Cox-proportional hazard's model comparing matched pairs

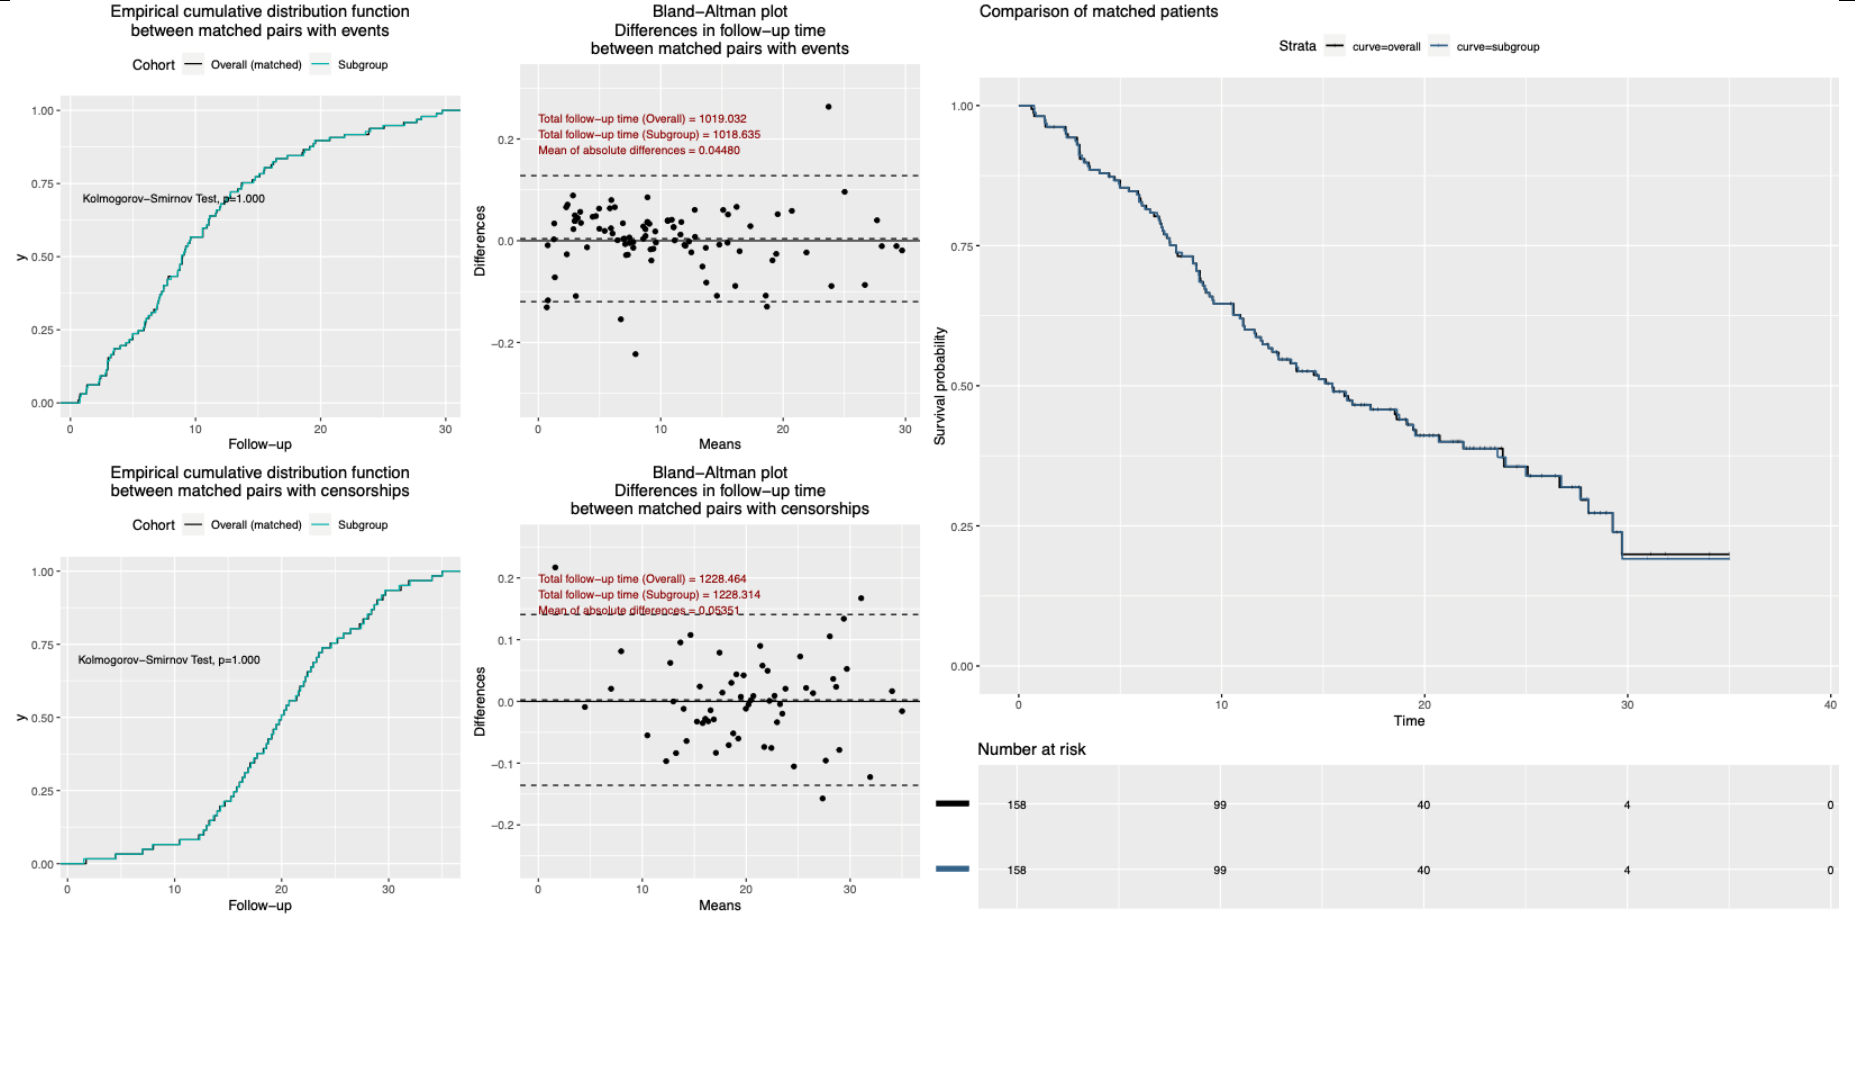

# CM648 PFS TPS $\geq 1\%$ (Chemo)

Empirical cumulative distribution between follow-up time of matched pairs and Bland-Altman plots to explore discrepancies between matched pairs

Kaplan Meier Curves and Cox-proportional hazard's model comparing matched pairs

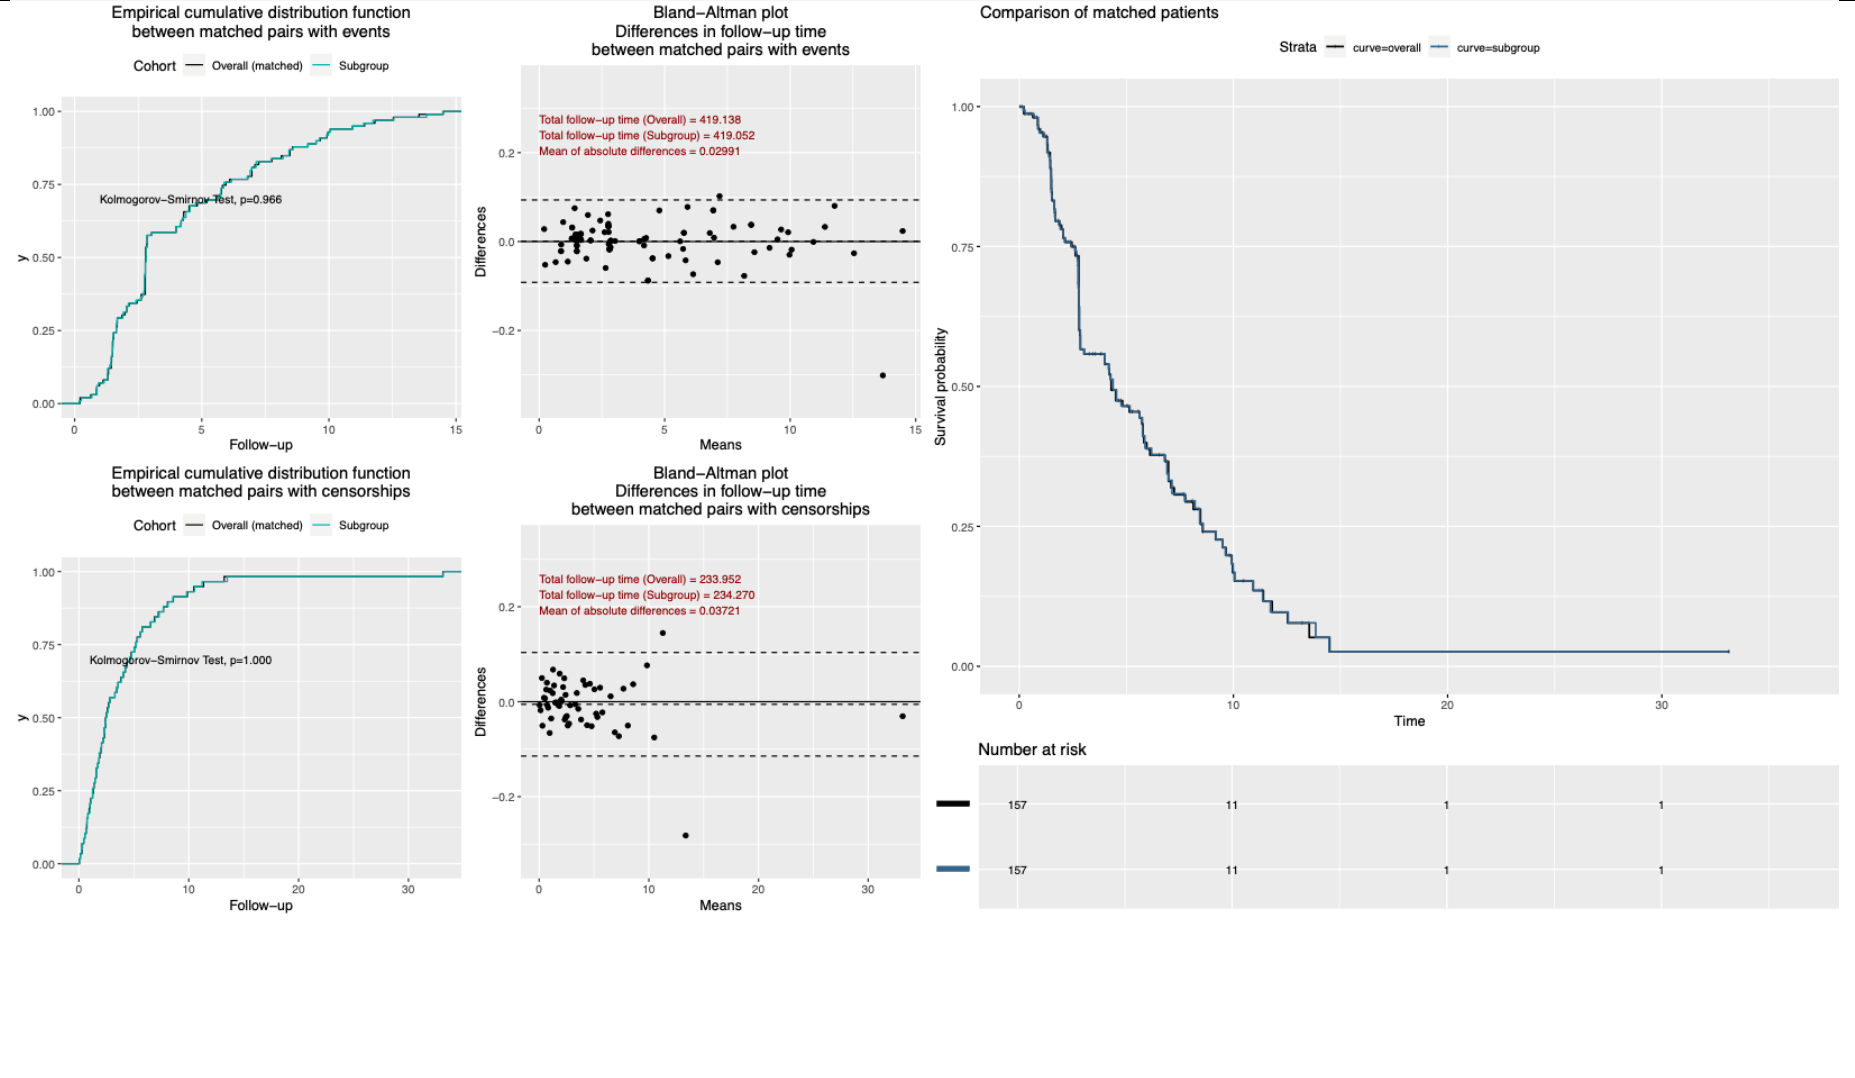

# CM648 PFS TPS $\geq 1\%$ (Nivo + Ipi)

Empirical cumulative distribution between follow-up time of matched pairs and Bland-Altman plots to explore discrepancies between matched pairs

Kaplan Meier Curves and Cox-proportional hazard's model comparing matched pairs

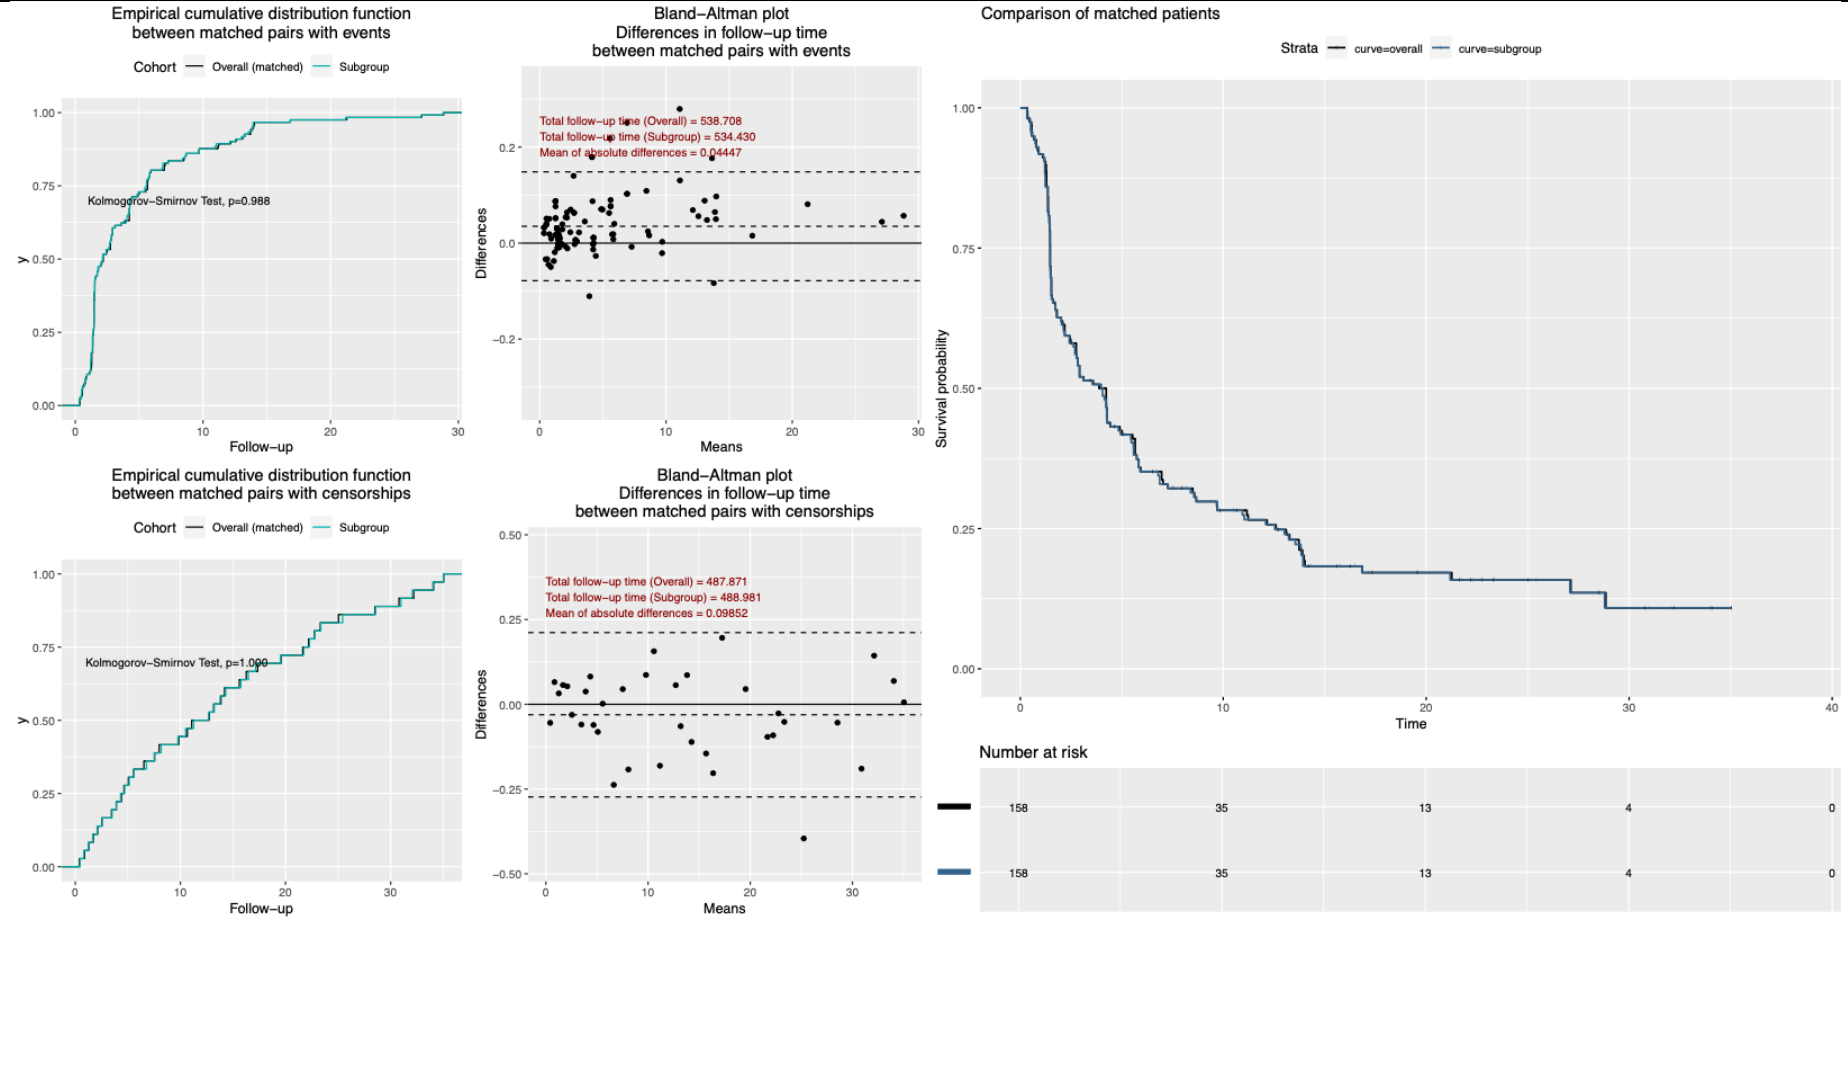



# CM648 PFS TPS $\geq 1\%$ (Nivo + Chemo)

Empirical cumulative distribution between follow-up time of matched pairs and Bland-Altman plots to explore discrepancies between matched pairs

Kaplan Meier Curves and Cox-proportional hazard's model comparing matched pairs

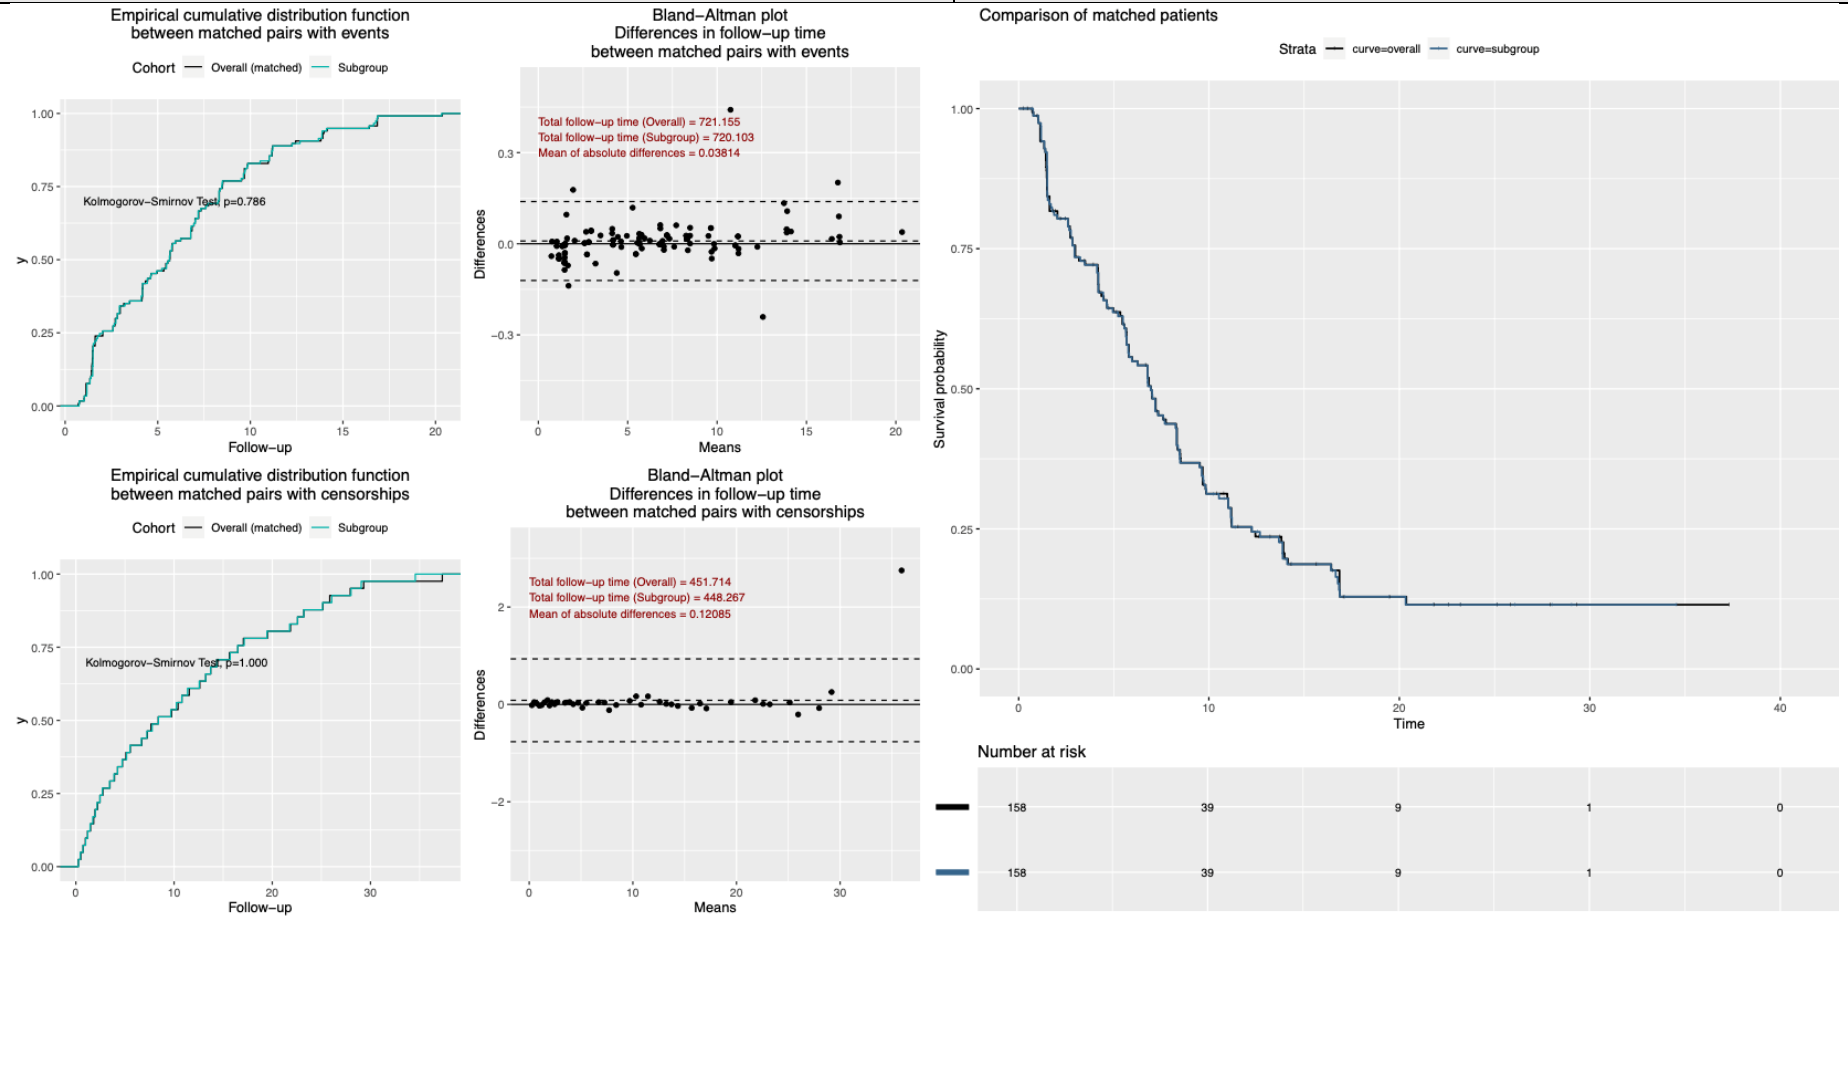

# ESCORT1st OS TPS $\geq 1\%$ (Chemo)

Empirical cumulative distribution between follow-up time of matched pairs and Bland-Altman plots to explore discrepancies between matched pairs

Kaplan Meier Curves and Cox-proportional hazard's model comparing matched pairs

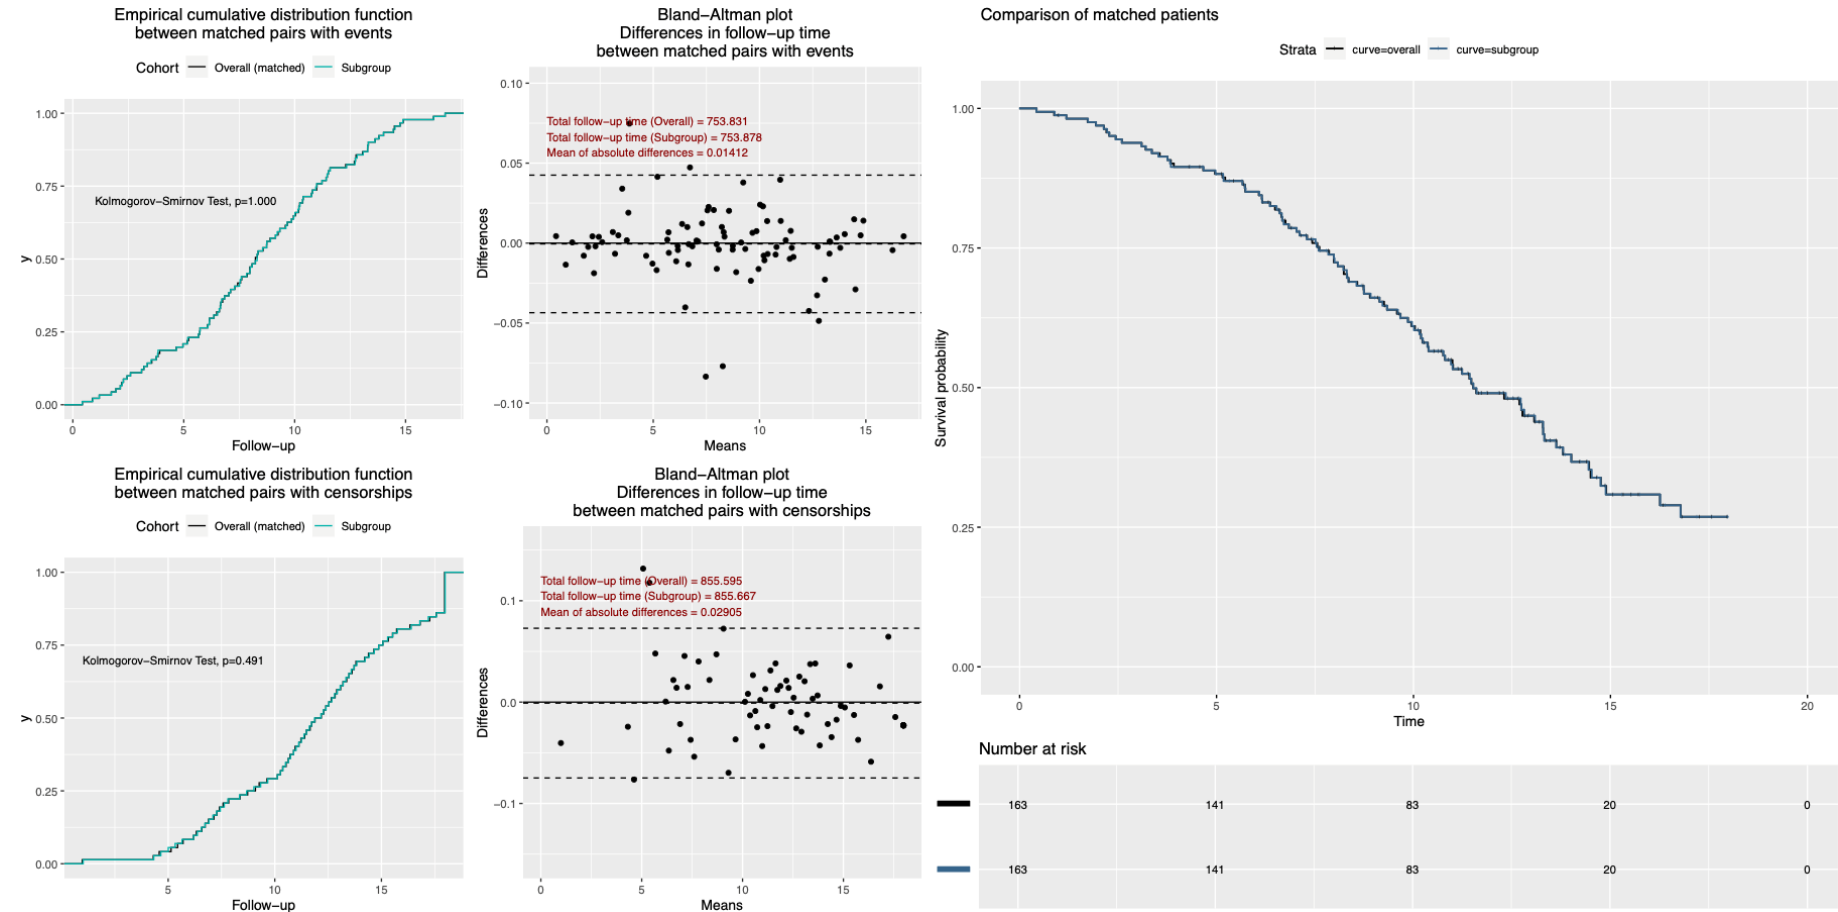

# ESCORT1st OS TPS $\geq 1\%$ (Camre + Chemo)

Empirical cumulative distribution between follow-up time of matched pairs and Bland-Altman plots to explore discrepancies between matched pairs

Kaplan Meier Curves and Cox-proportional hazard's model comparing matched pairs

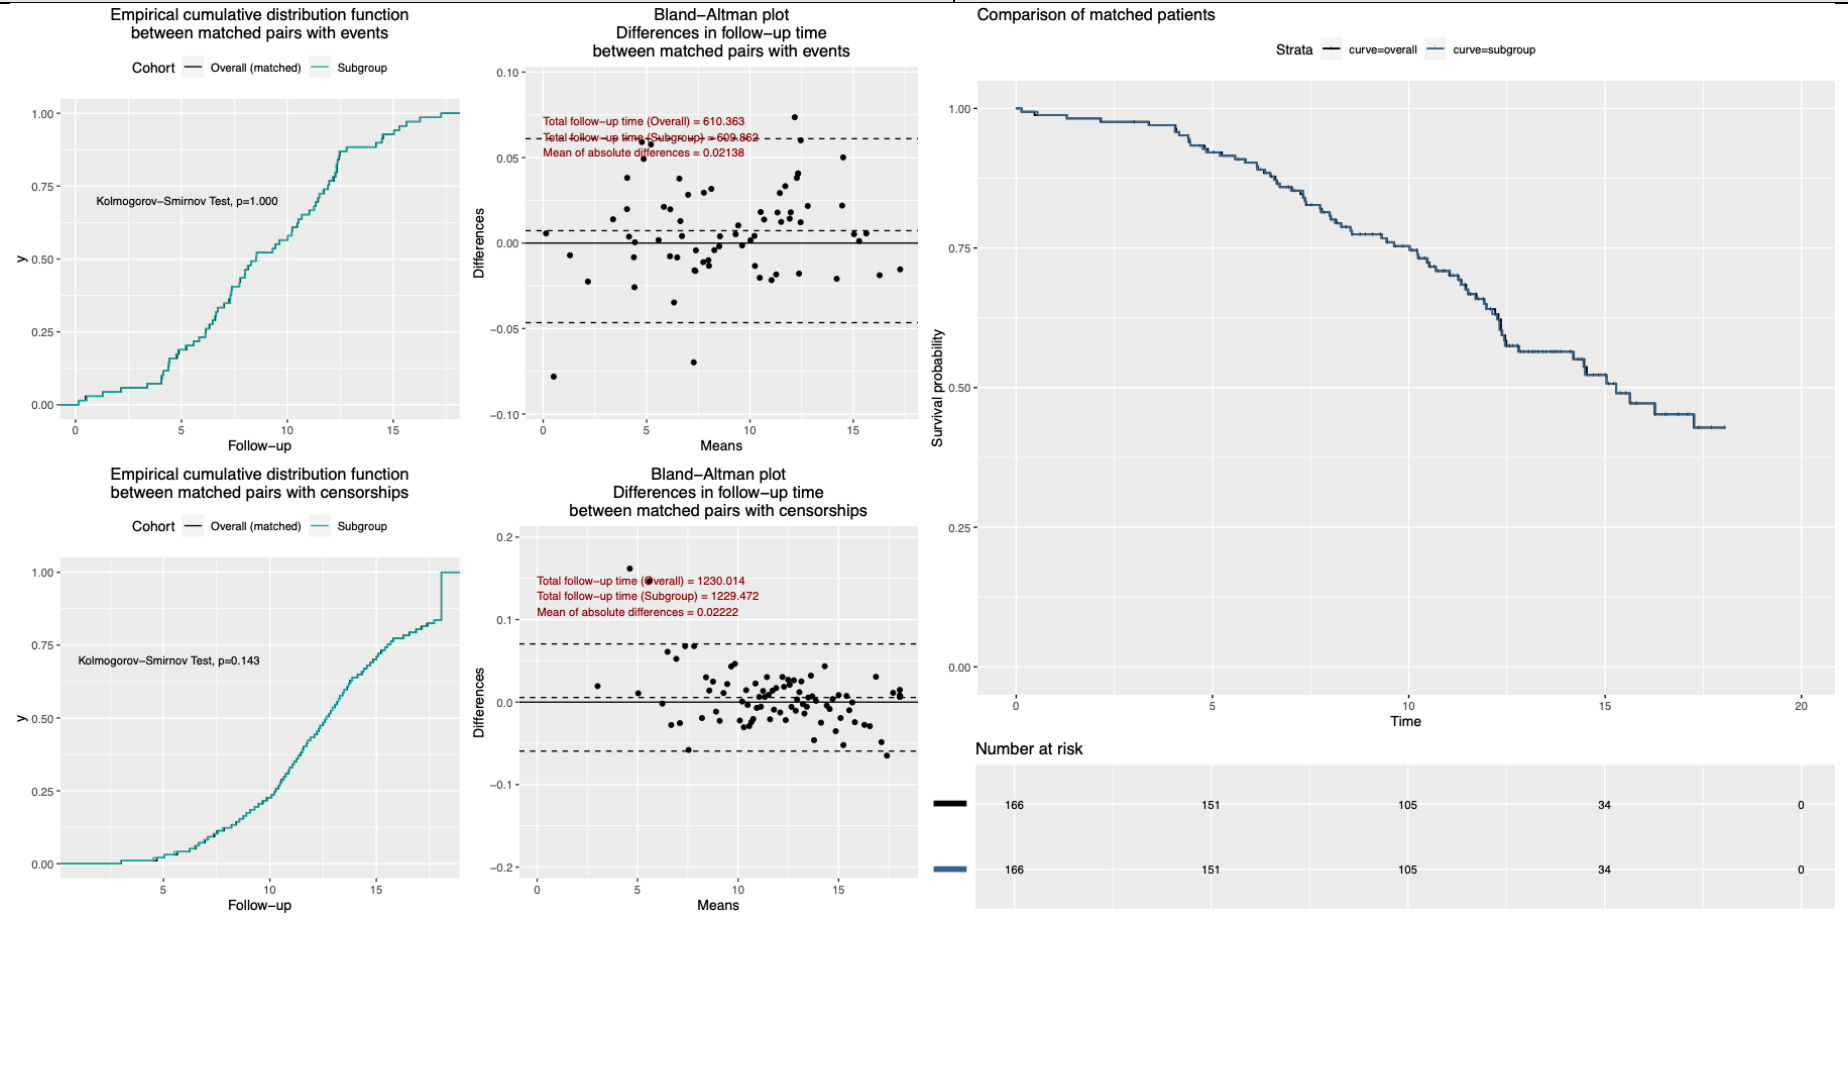

# KN181 OS CPS $\geq 10\%$ (Chemo)

Empirical cumulative distribution between follow-up time of matched pairs and Bland-Altman plots to explore discrepancies between matched pairs

Kaplan Meier Curves and Cox-proportional hazard's model comparing matched pairs

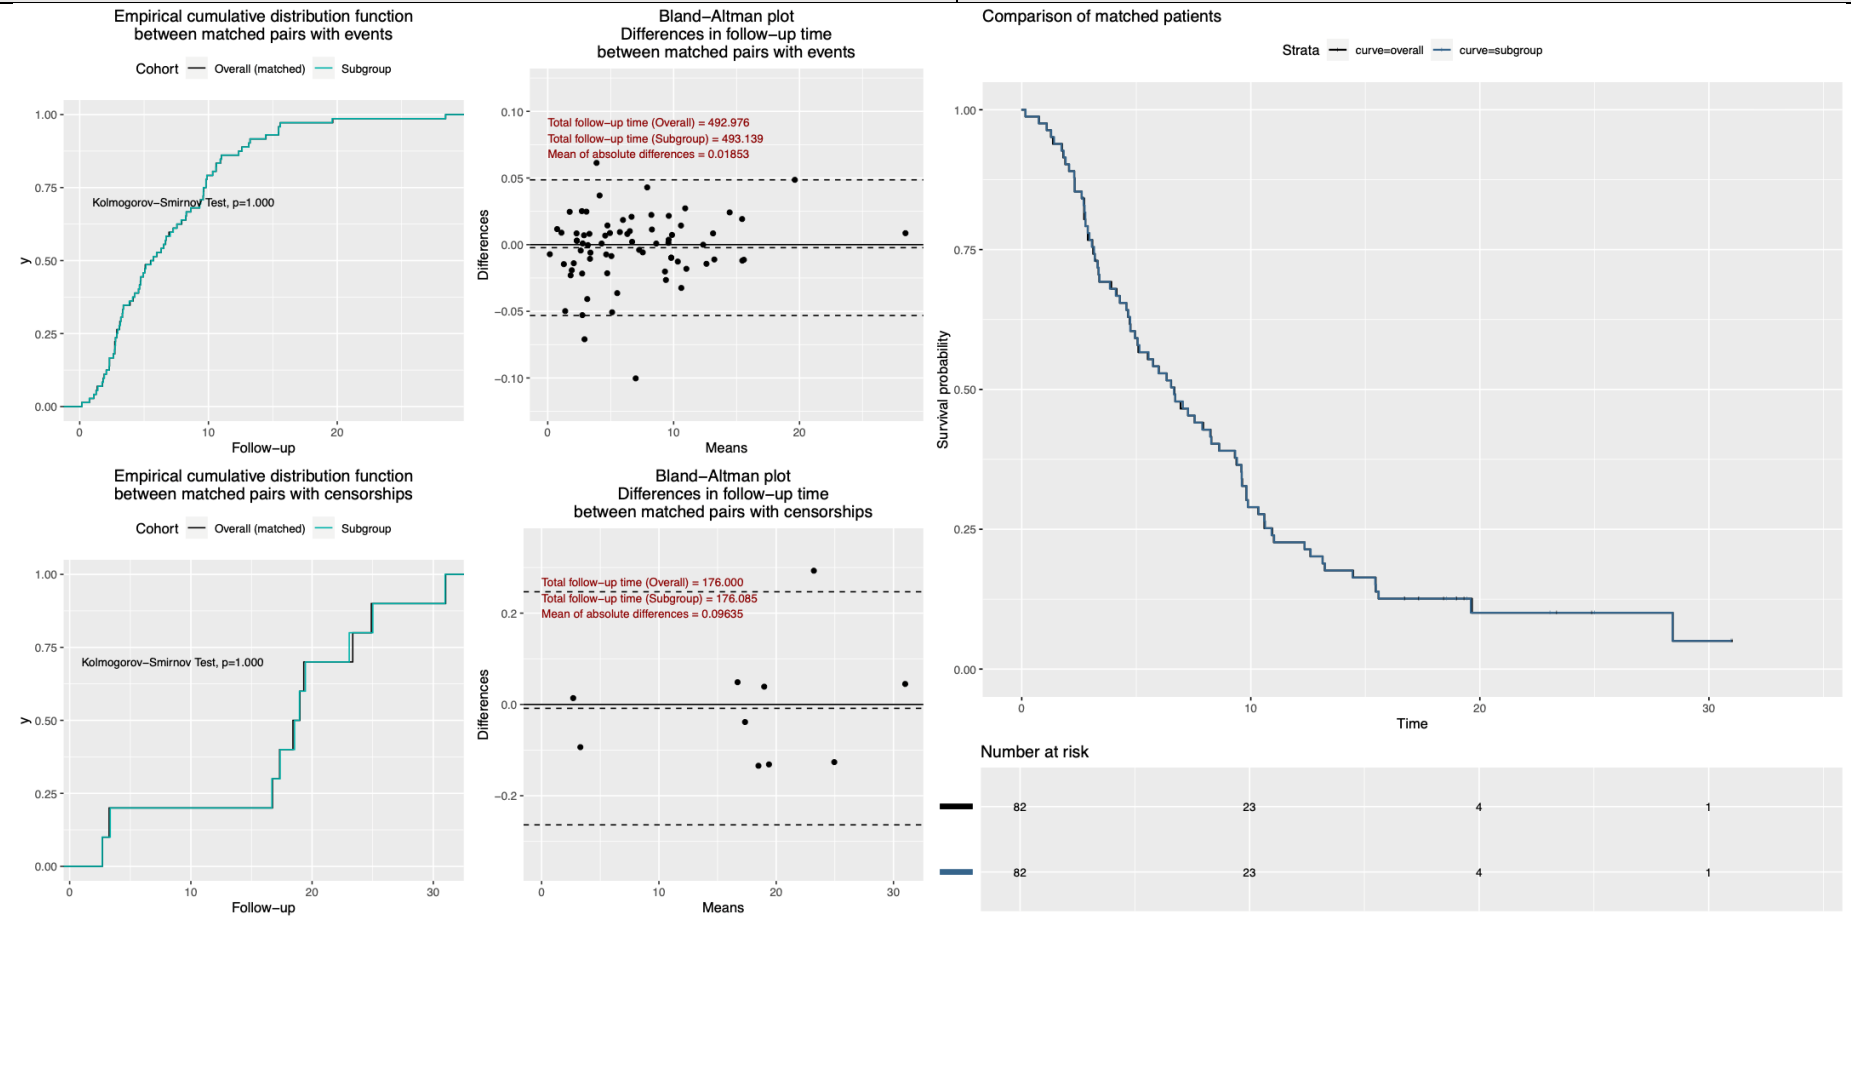

# KN181 OS CPS $\geq 10\%$ (Pembro)

Empirical cumulative distribution between follow-up time of matched pairs and Bland-Altman plots to explore discrepancies between matched pairs

Kaplan Meier Curves and Cox-proportional hazard's model comparing matched pairs

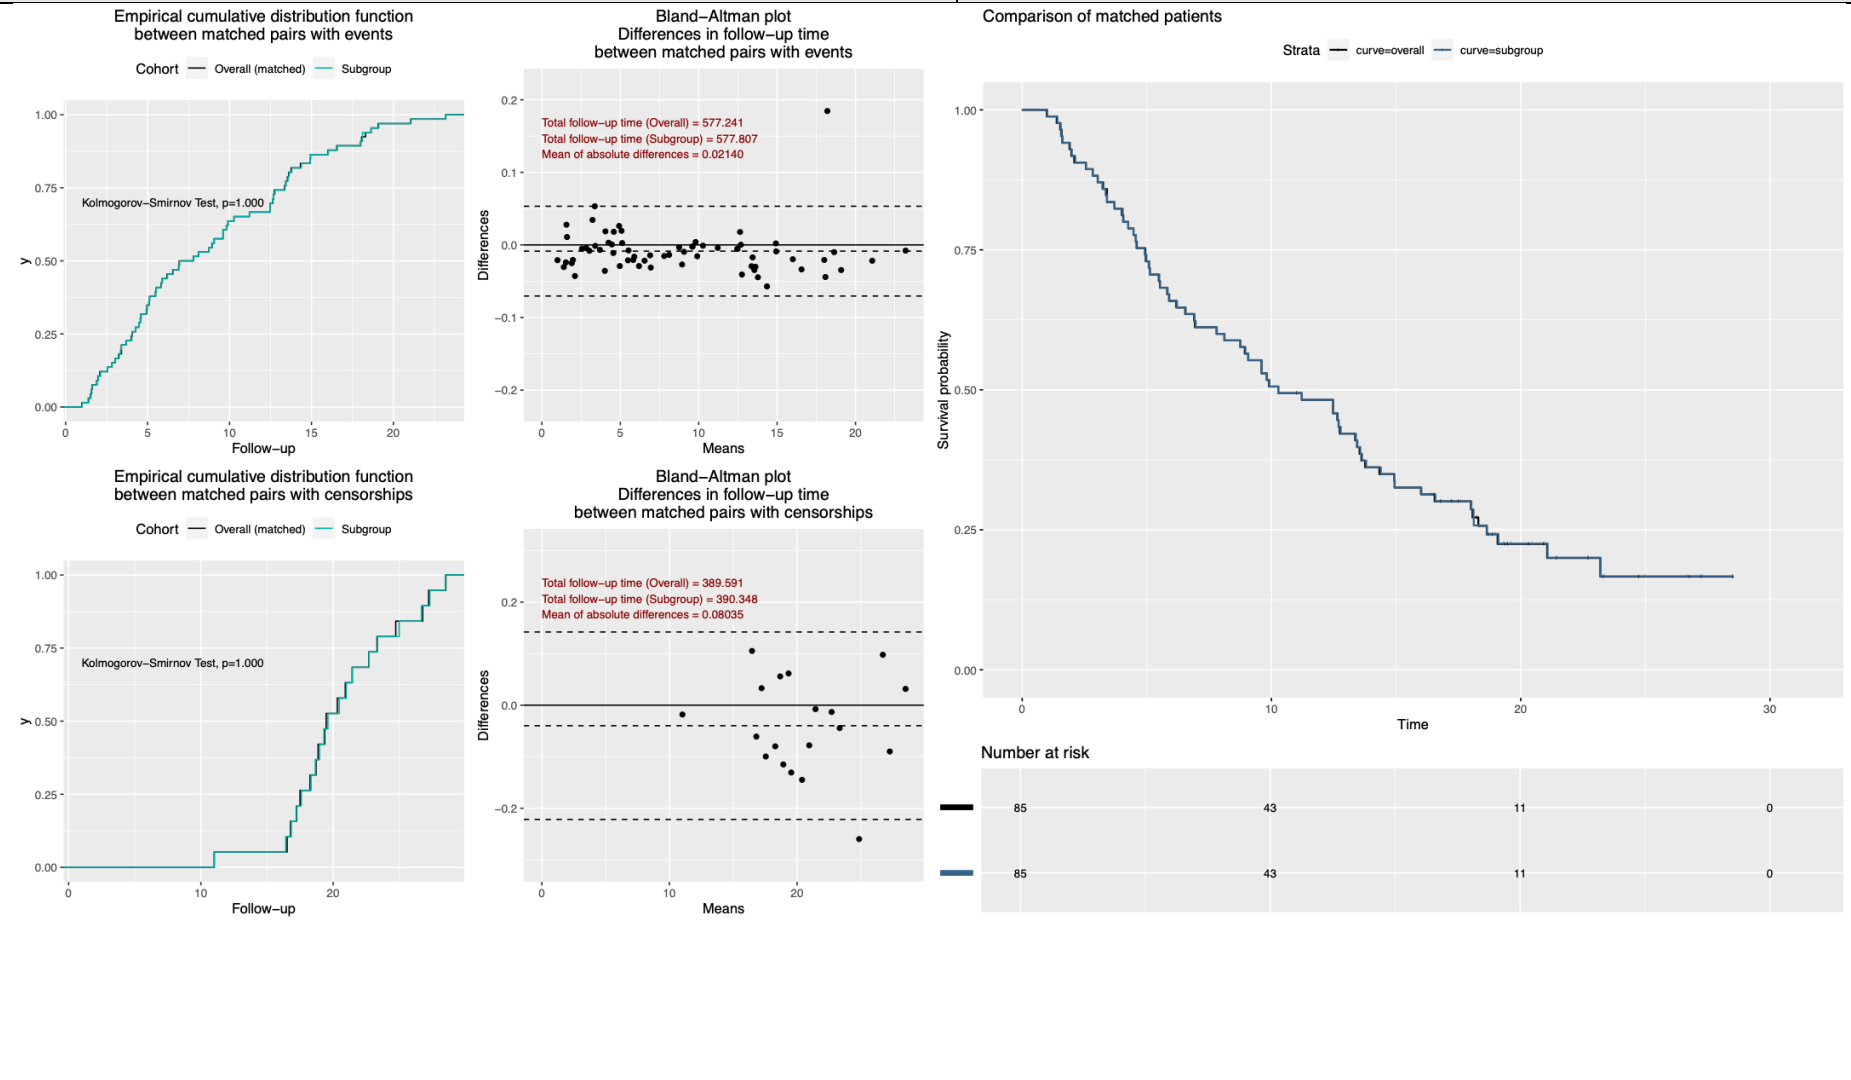

# RATIONALE302 OS TAP $\geq 10\%$ (Chemo)

Empirical cumulative distribution between follow-up time of matched pairs and Bland-Altman plots to explore discrepancies between matched pairs

Kaplan Meier Curves and Cox-proportional hazard's model comparing matched pairs

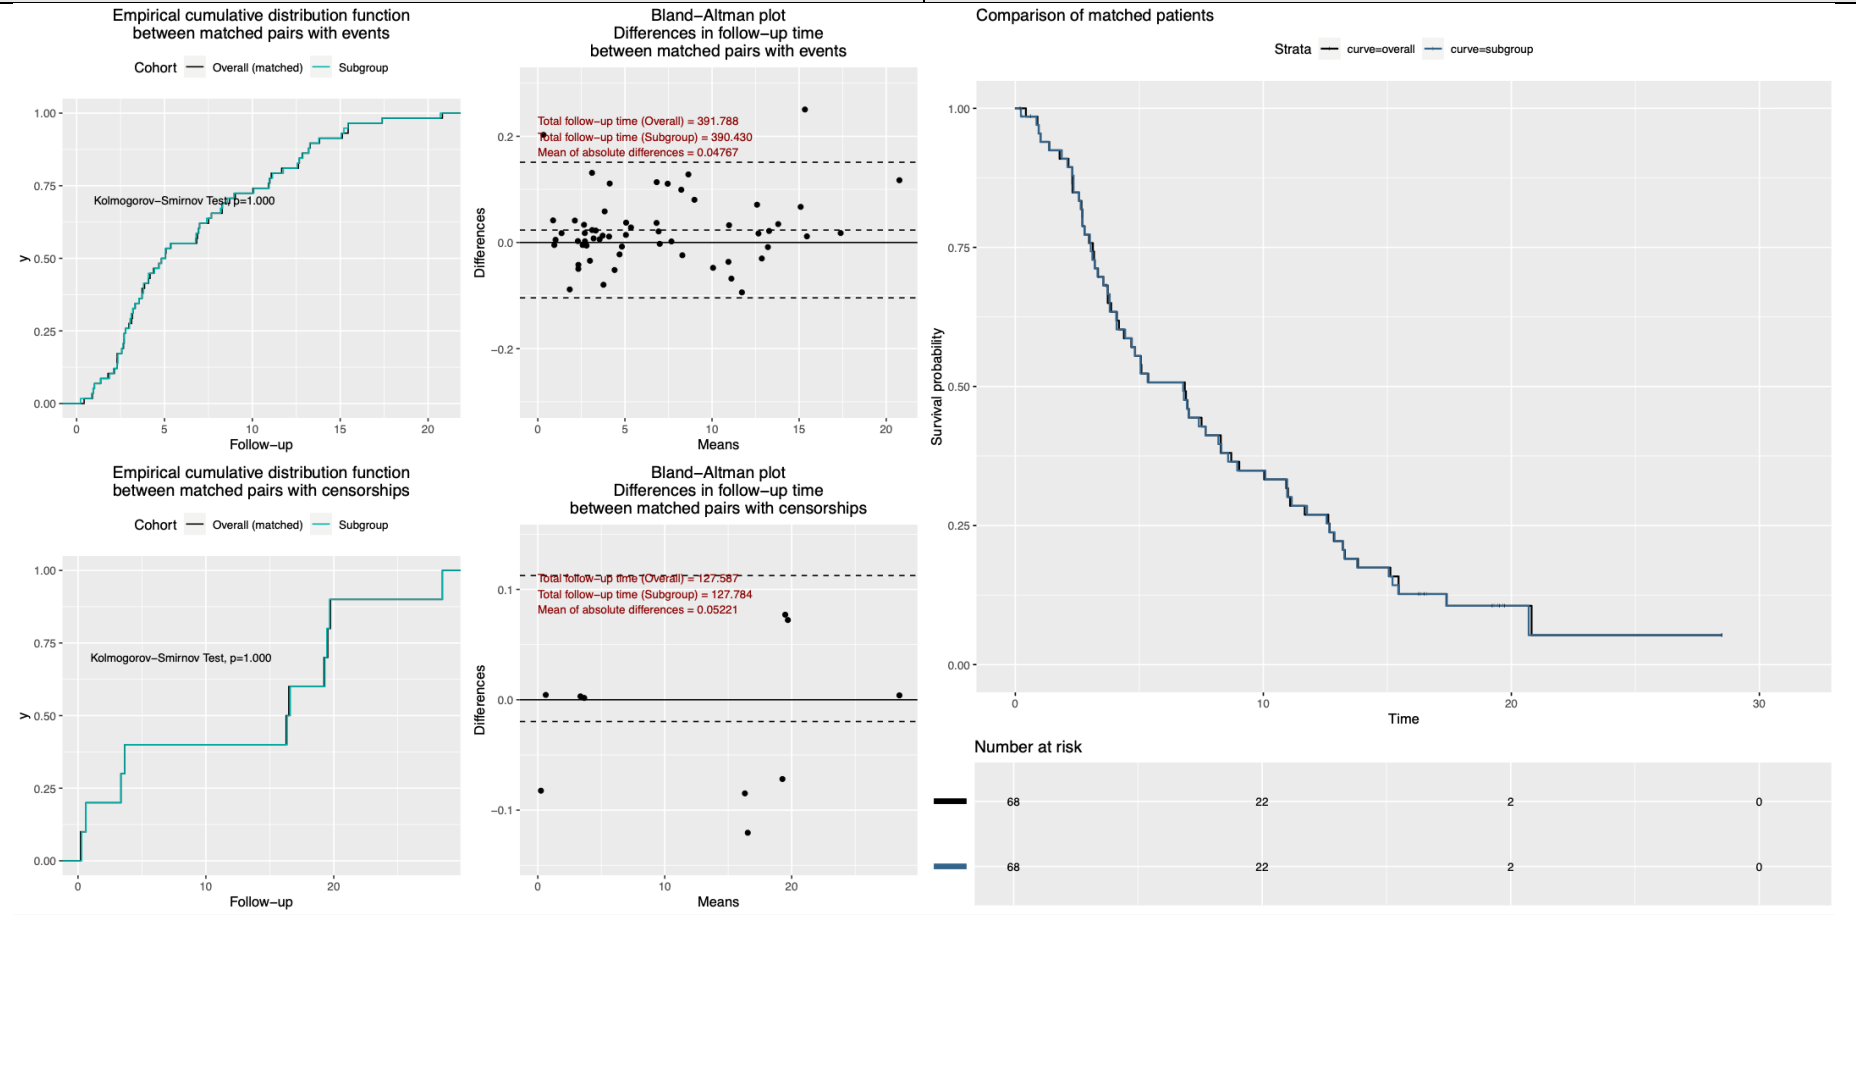

# RATIONALE302 OS TAP $\geq 10\%$ (Tisle)

Empirical cumulative distribution between follow-up time of matched pairs and Bland-Altman plots to explore discrepancies between matched pairs

Kaplan Meier Curves and Cox-proportional hazard's model comparing matched pairs

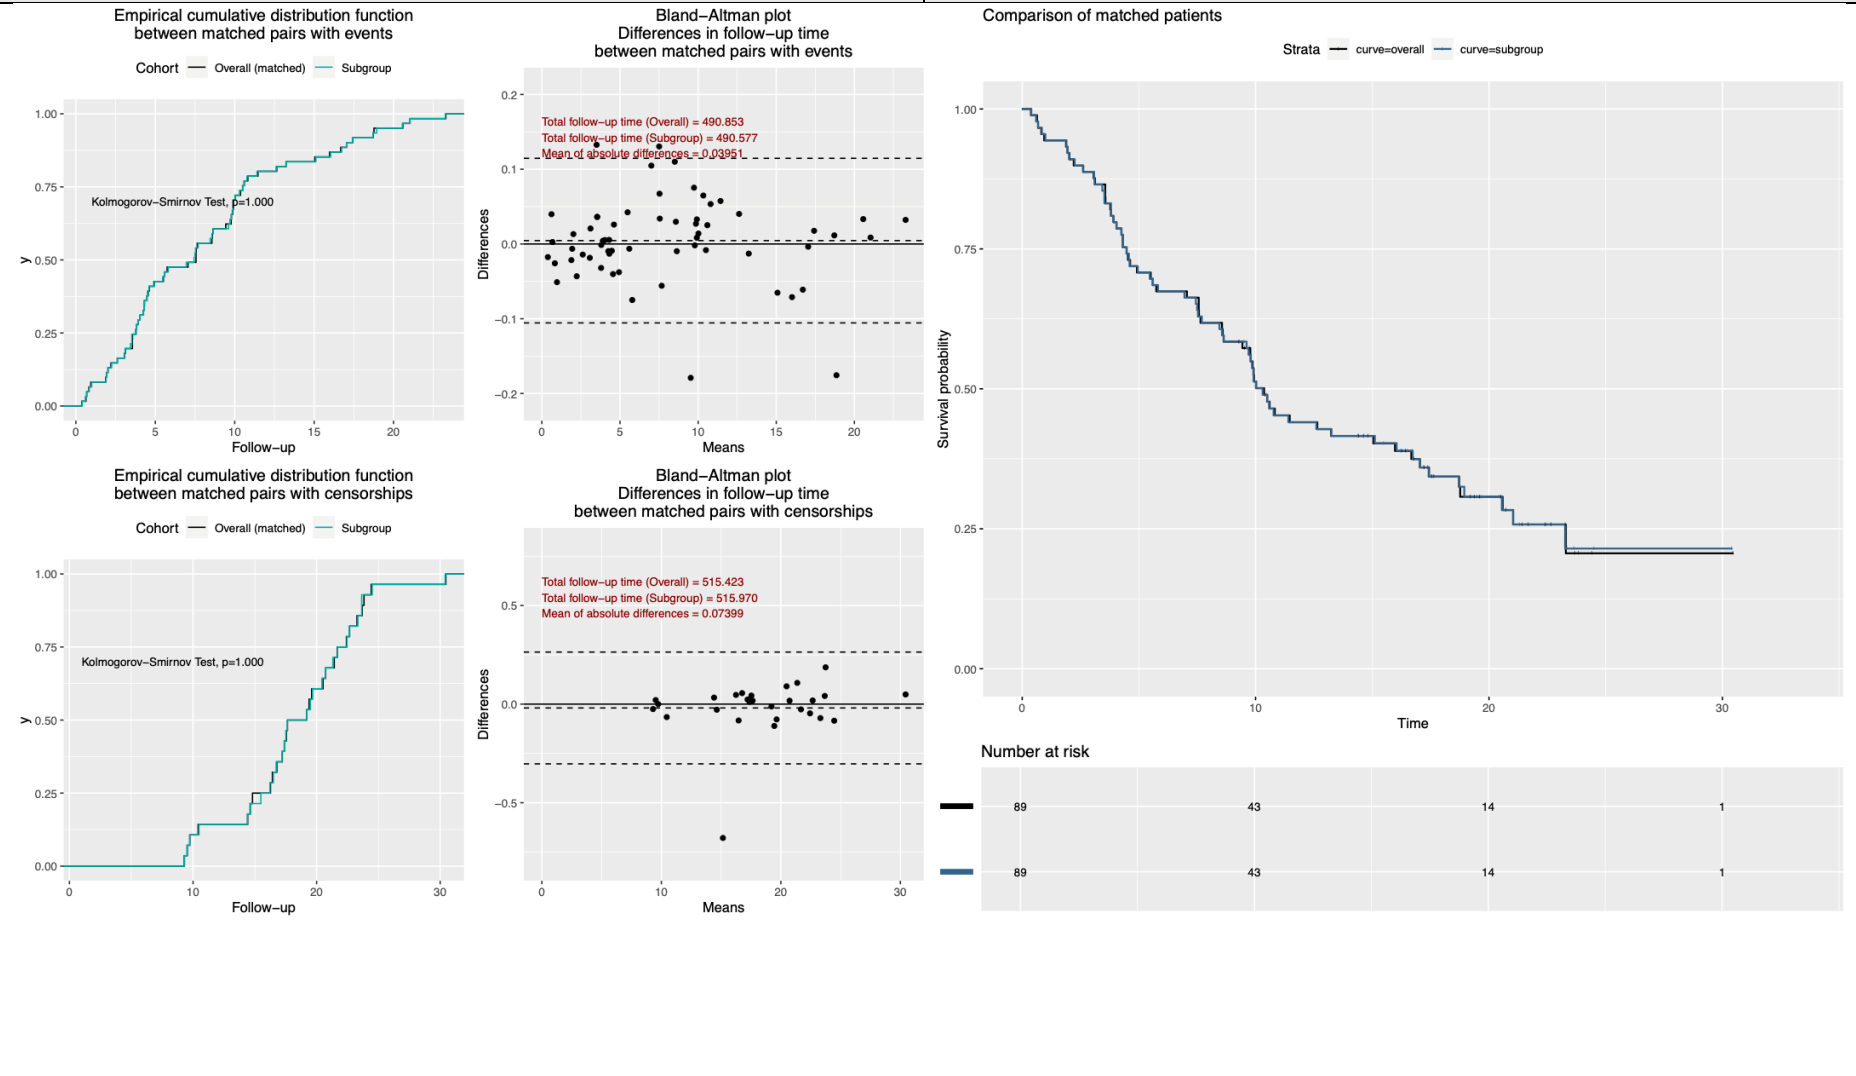

# ORIENT15 OS CPS $\geq 10\%$ (Chemo)

Empirical cumulative distribution between follow-up time of matched pairs and Bland-Altman plots to explore discrepancies between matched pairs

Kaplan Meier Curves and Cox-proportional hazard's model comparing matched pairs

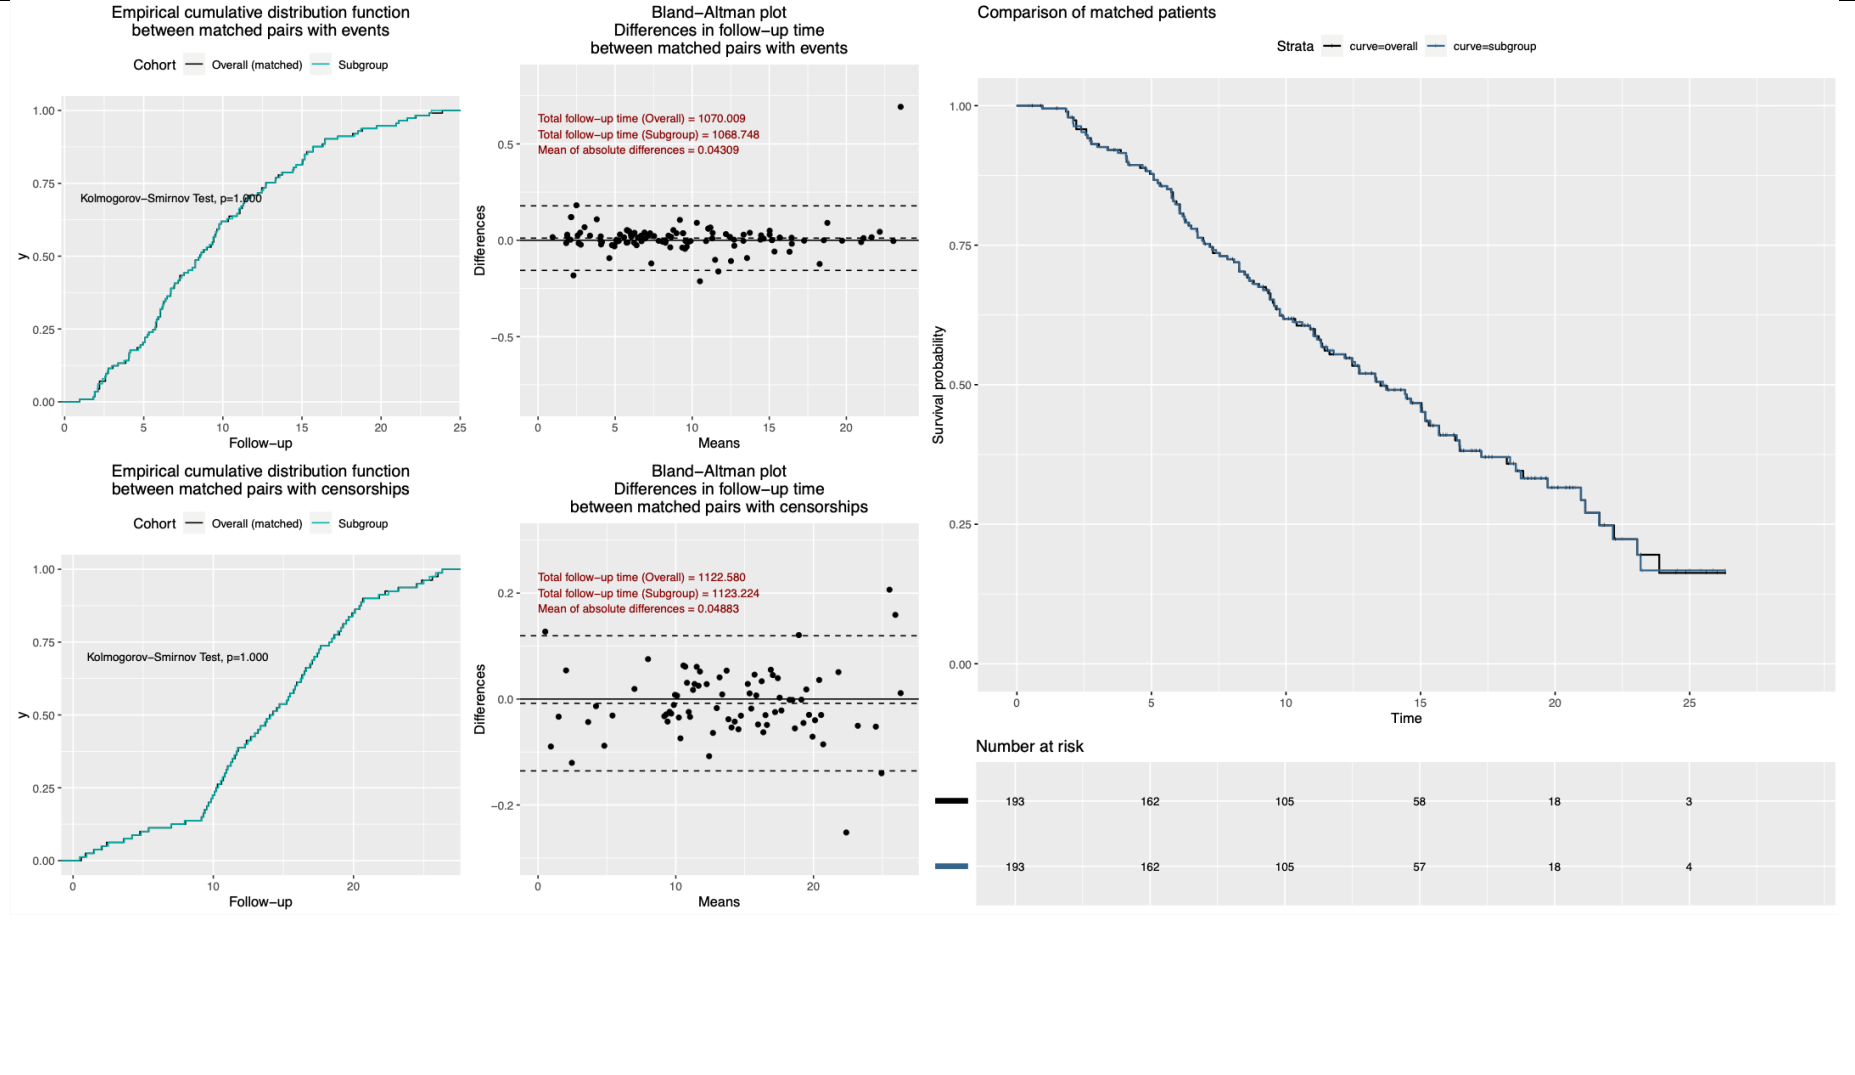



# ORIENT15 OS CPS $\geq 10\%$ (Sinti + Chemo)

Empirical cumulative distribution between follow-up time of matched pairs and Bland-Altman plots to explore discrepancies between matched pairs

Kaplan Meier Curves and Cox-proportional hazard's model comparing matched pairs

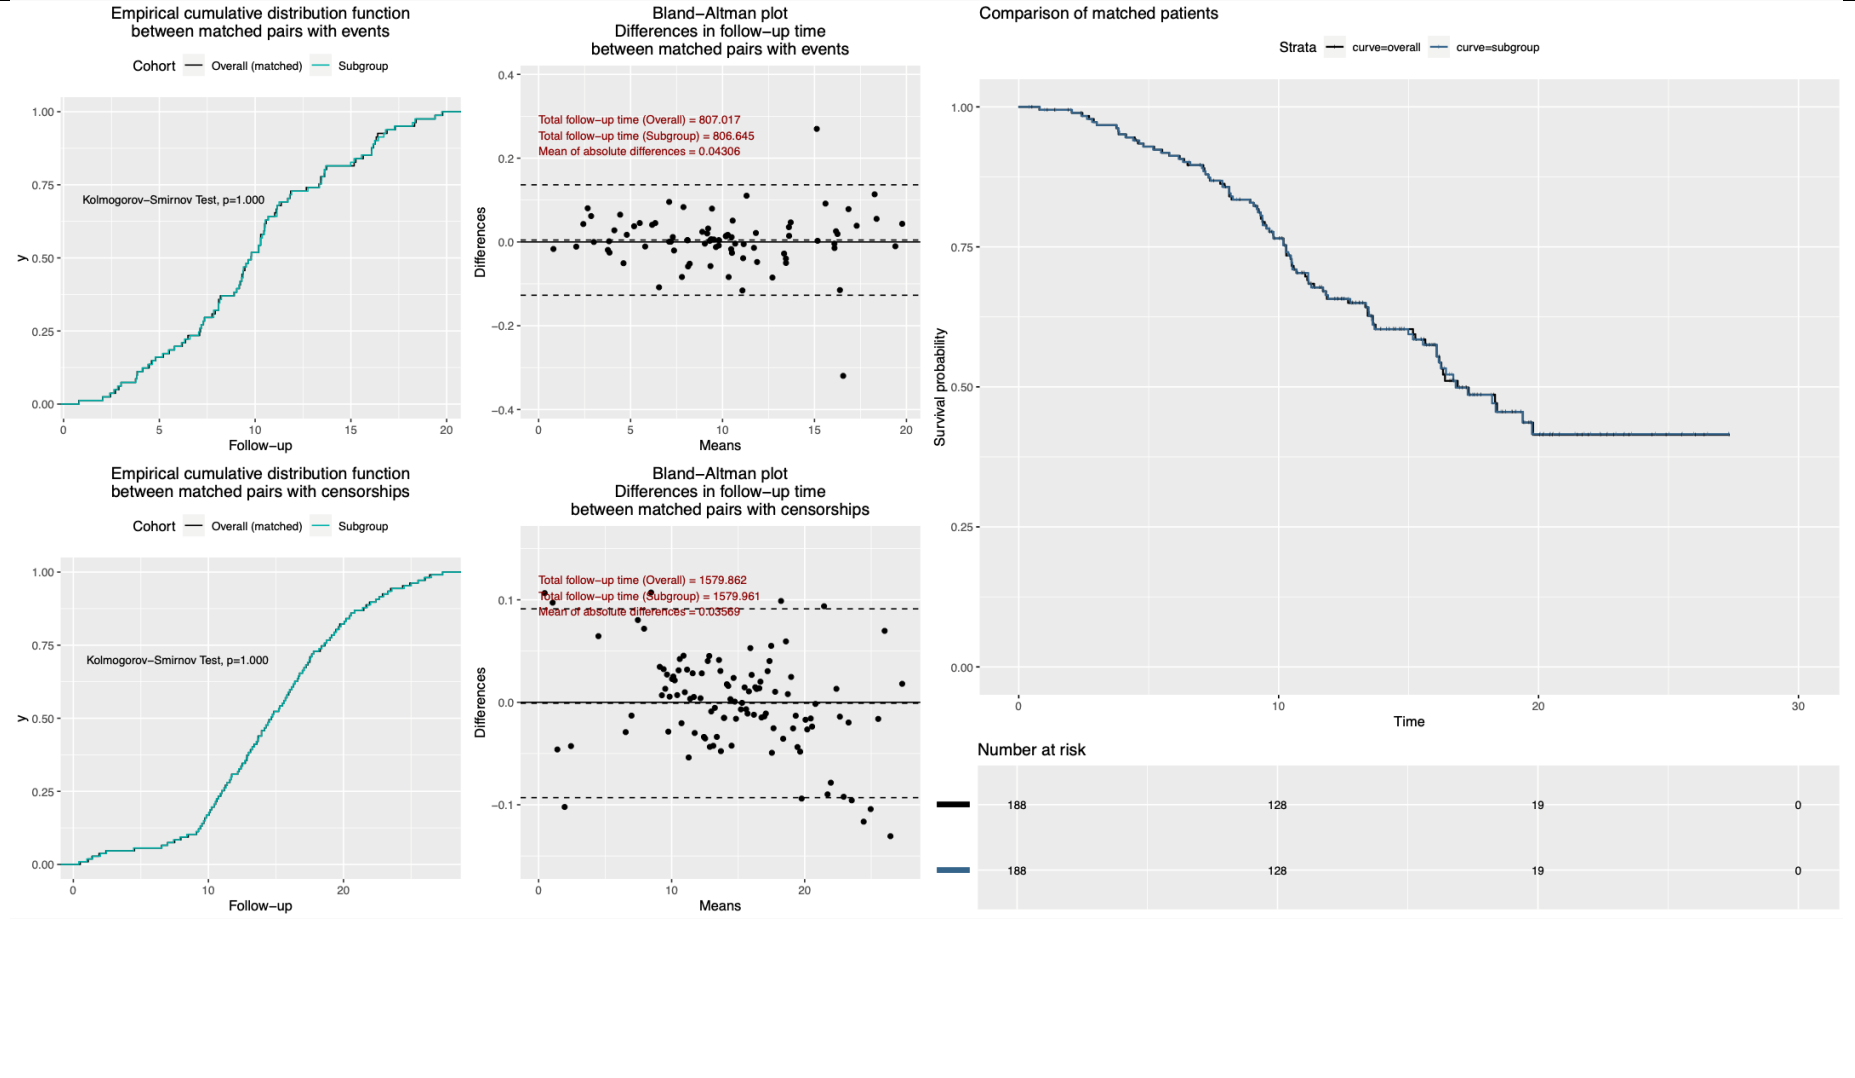

# ORIENT15 PFS CPS $\geq 10\%$ (Chemo)

Empirical cumulative distribution between follow-up time of matched pairs and Bland-Altman plots to explore discrepancies between matched pairs

Kaplan Meier Curves and Cox-proportional hazard's model comparing matched pairs

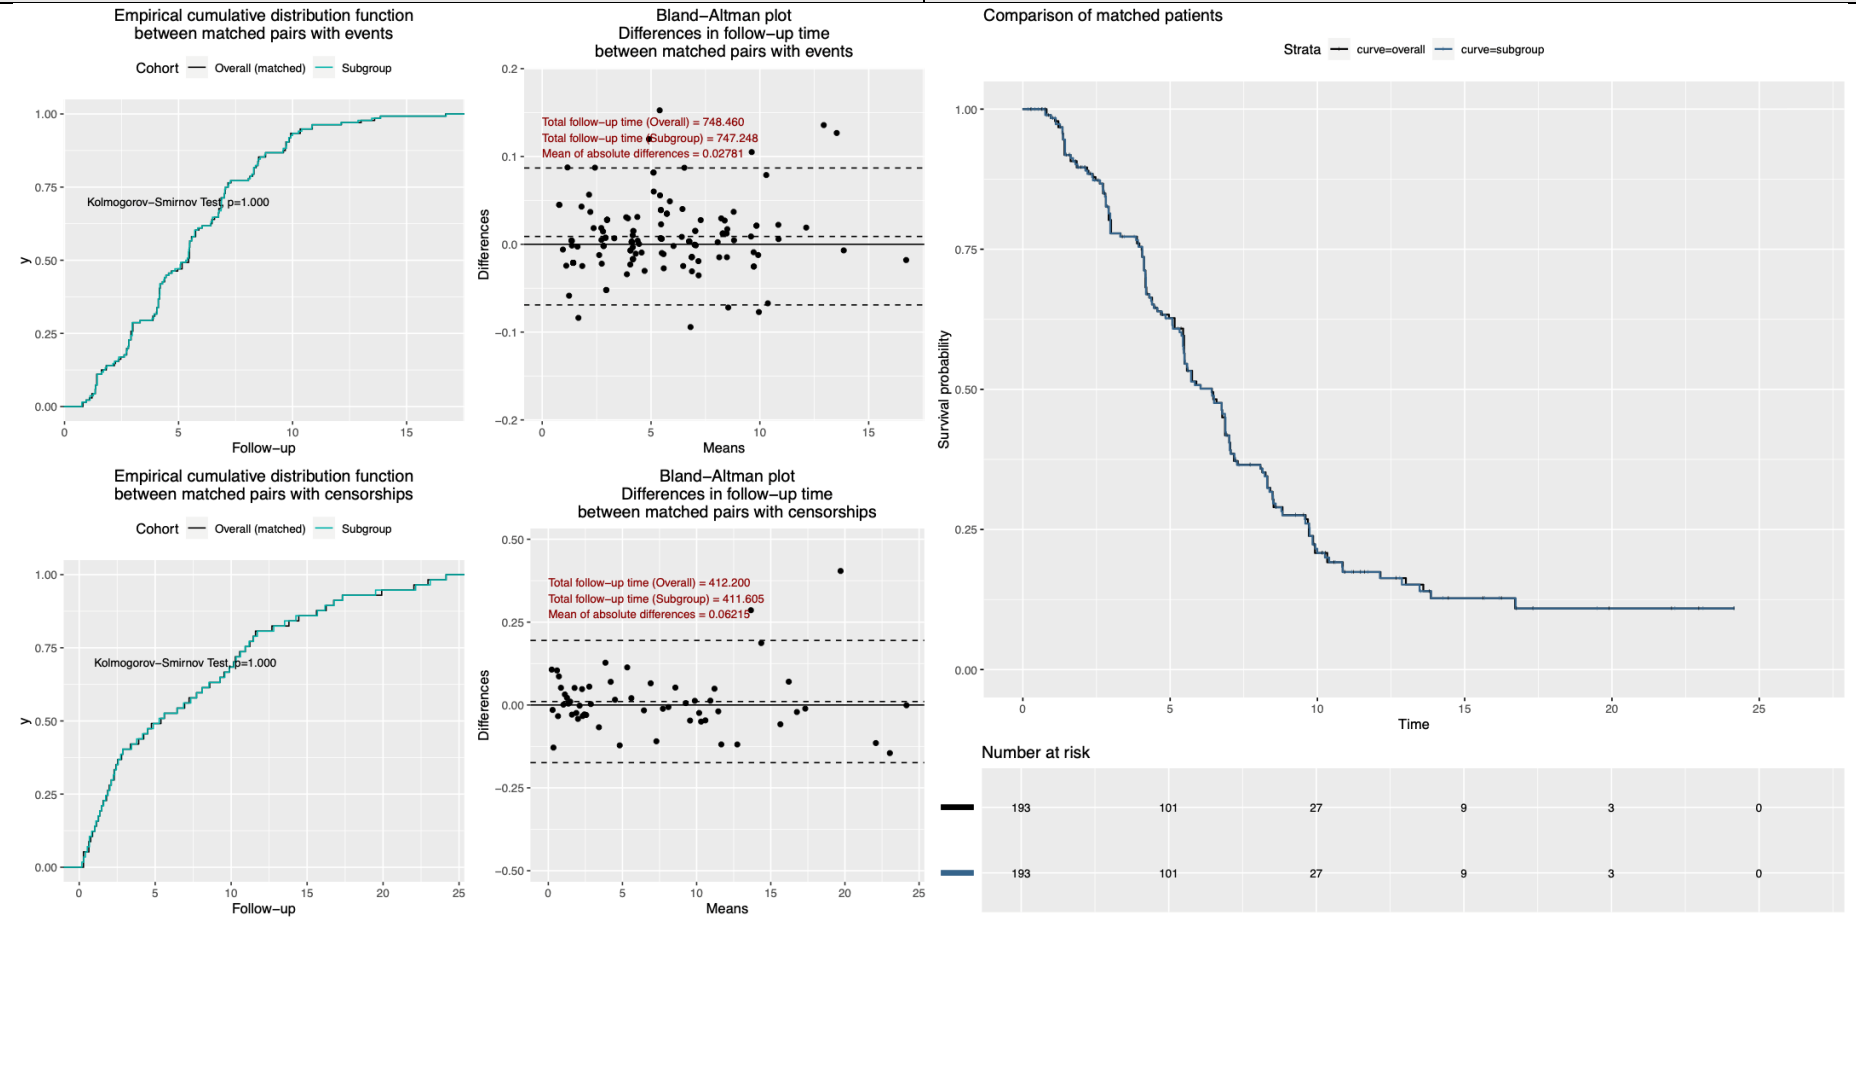

# ORIENT15 PFS CPS $\geq 10\%$ (Sinti + Chemo)

Empirical cumulative distribution between follow-up time of matched pairs and Bland-Altman plots to explore discrepancies between matched pairs

Kaplan Meier Curves and Cox-proportional hazard's model comparing matched pairs

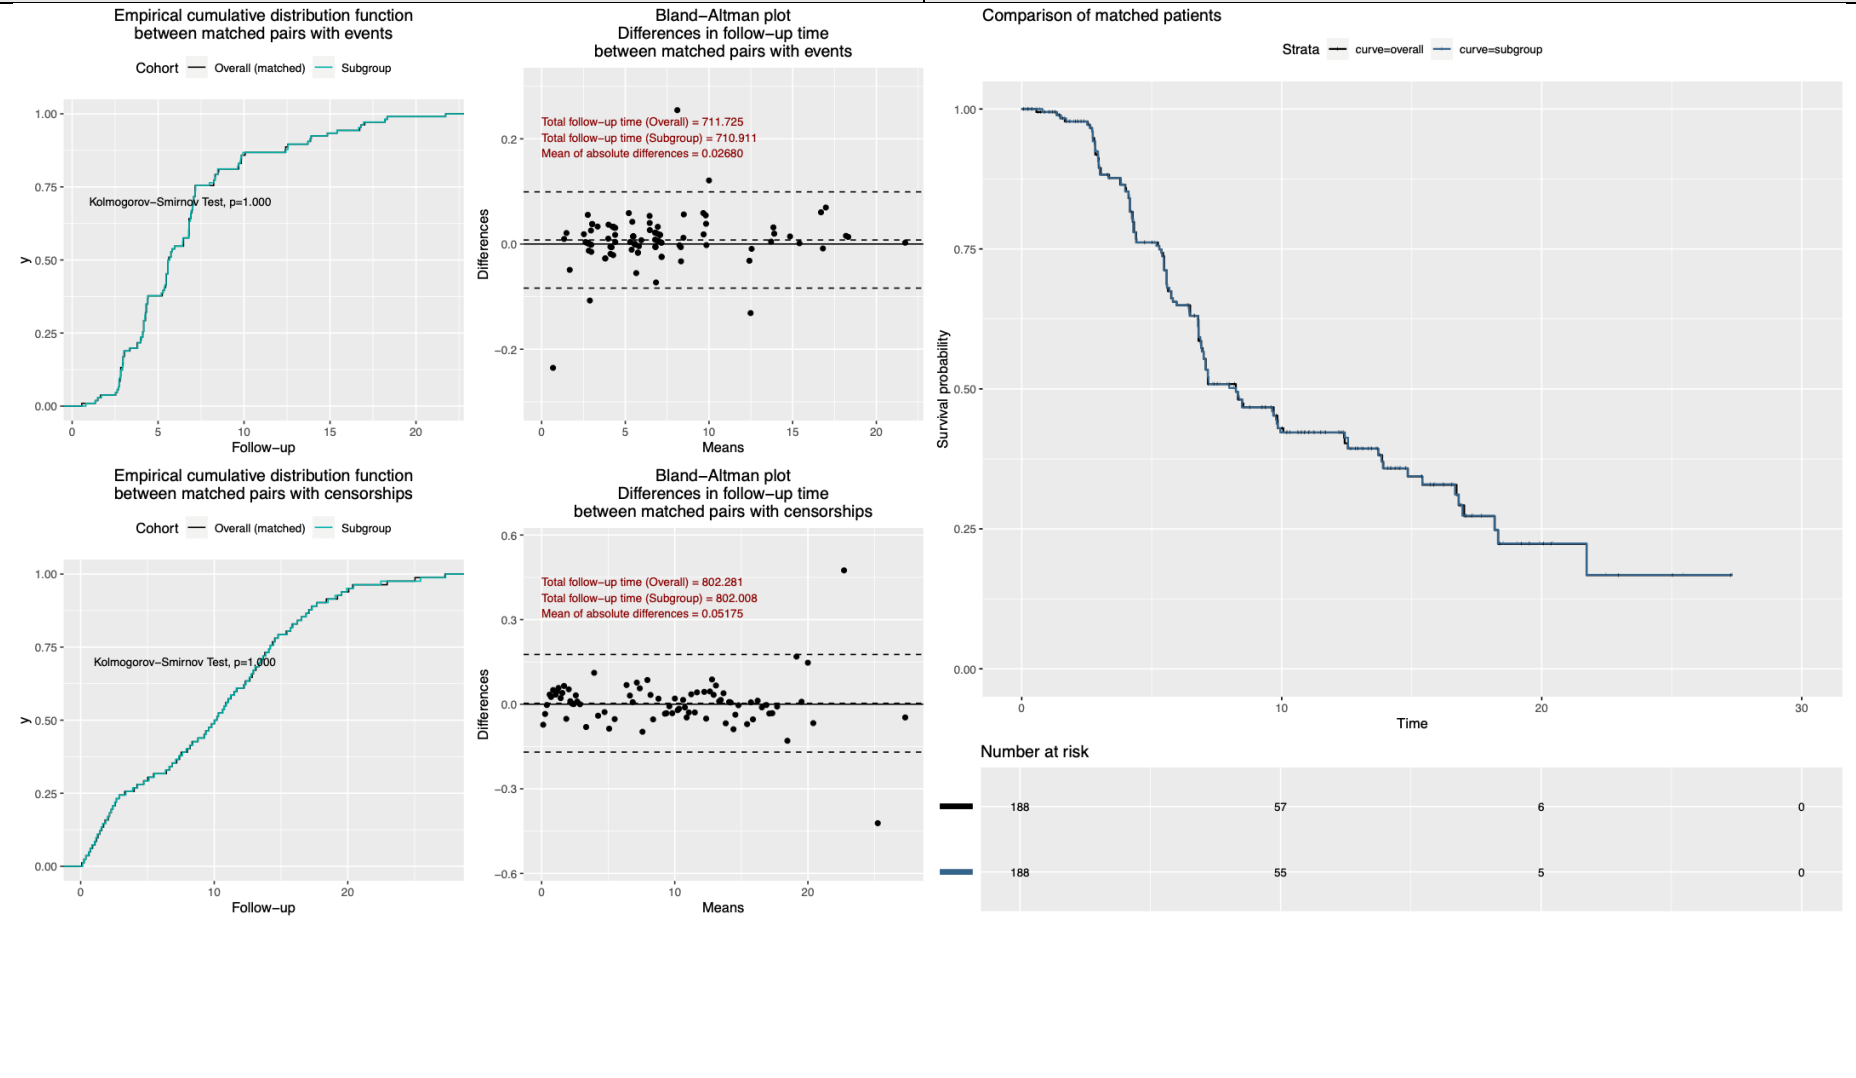

# KN590 OS CPS $\geq 10\%$ (Chemo)

Empirical cumulative distribution between follow-up time of matched pairs and Bland-Altman plots to explore discrepancies between matched pairs

Kaplan Meier Curves and Cox-proportional hazard's model comparing matched pairs

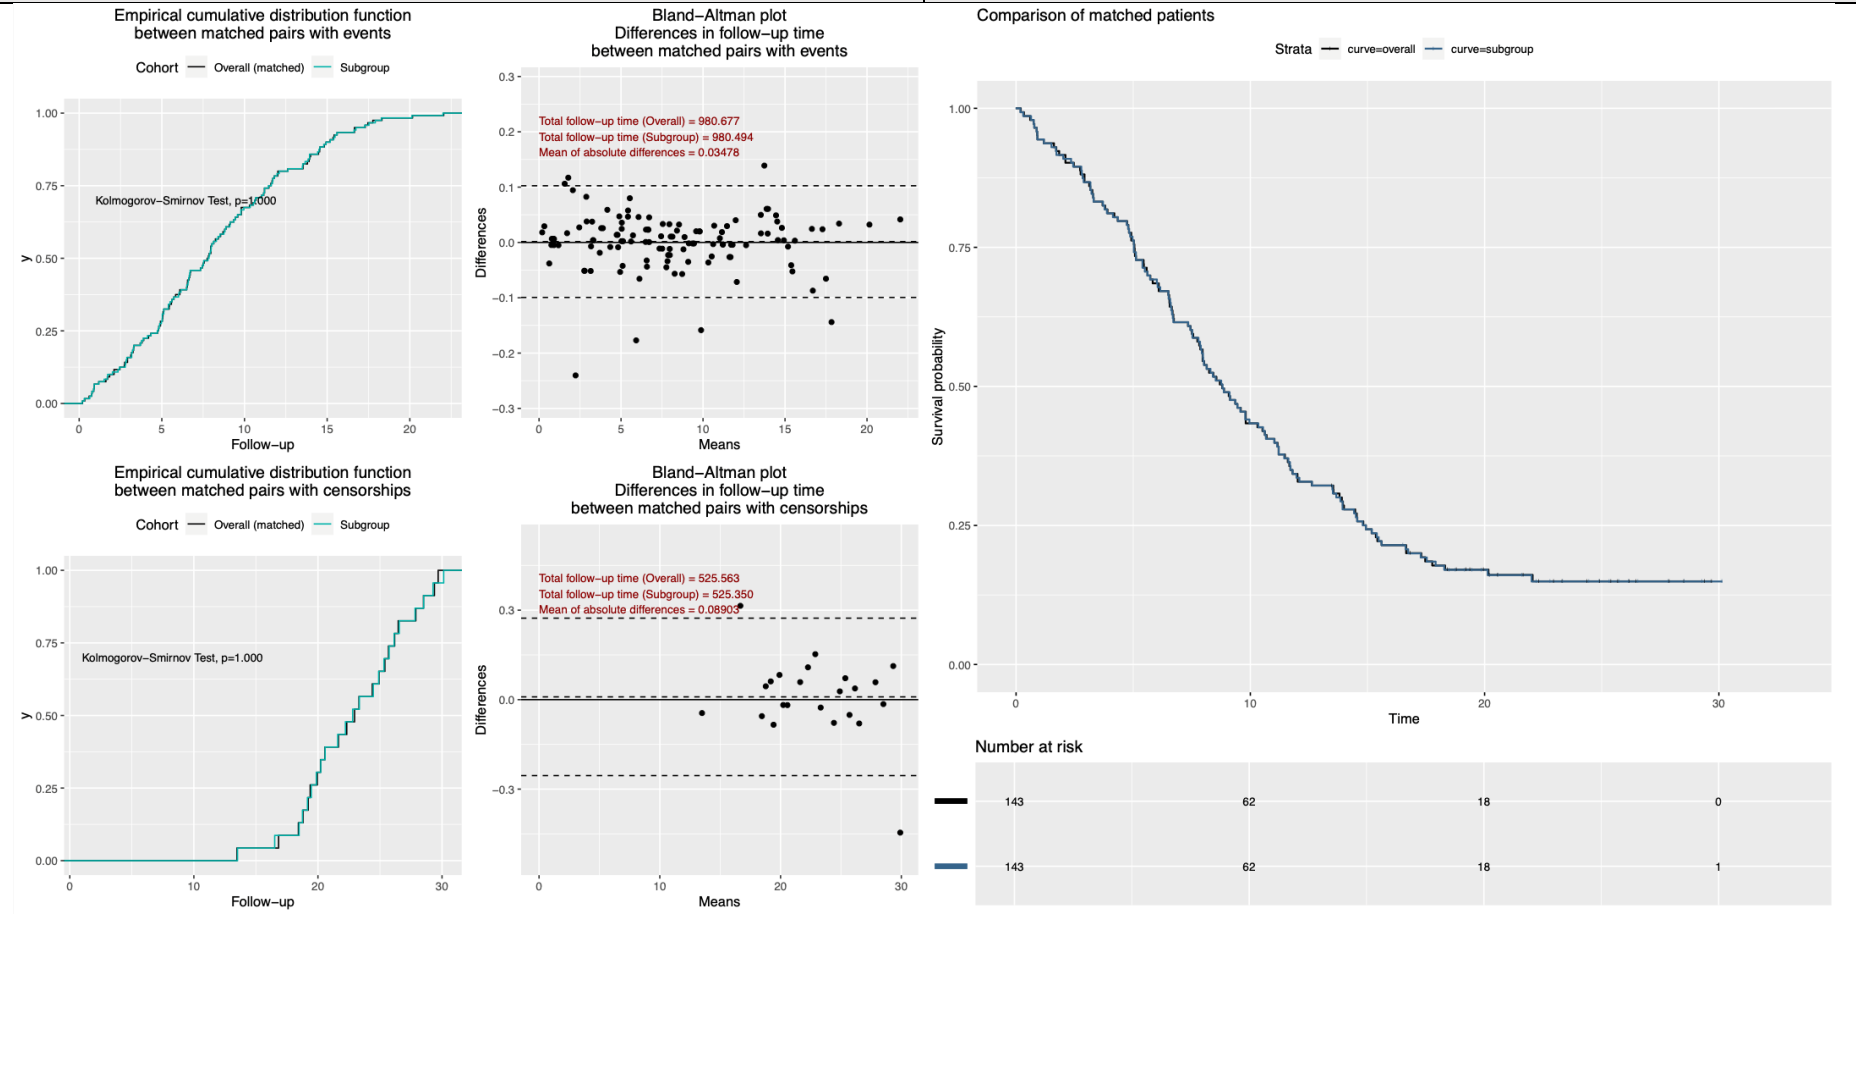

# KN590 OS CPS $\geq 10\%$ (Pembro + Chemo)

Empirical cumulative distribution between follow-up time of matched pairs and Bland-Altman plots to explore discrepancies between matched pairs

Kaplan Meier Curves and Cox-proportional hazard's model comparing matched pairs

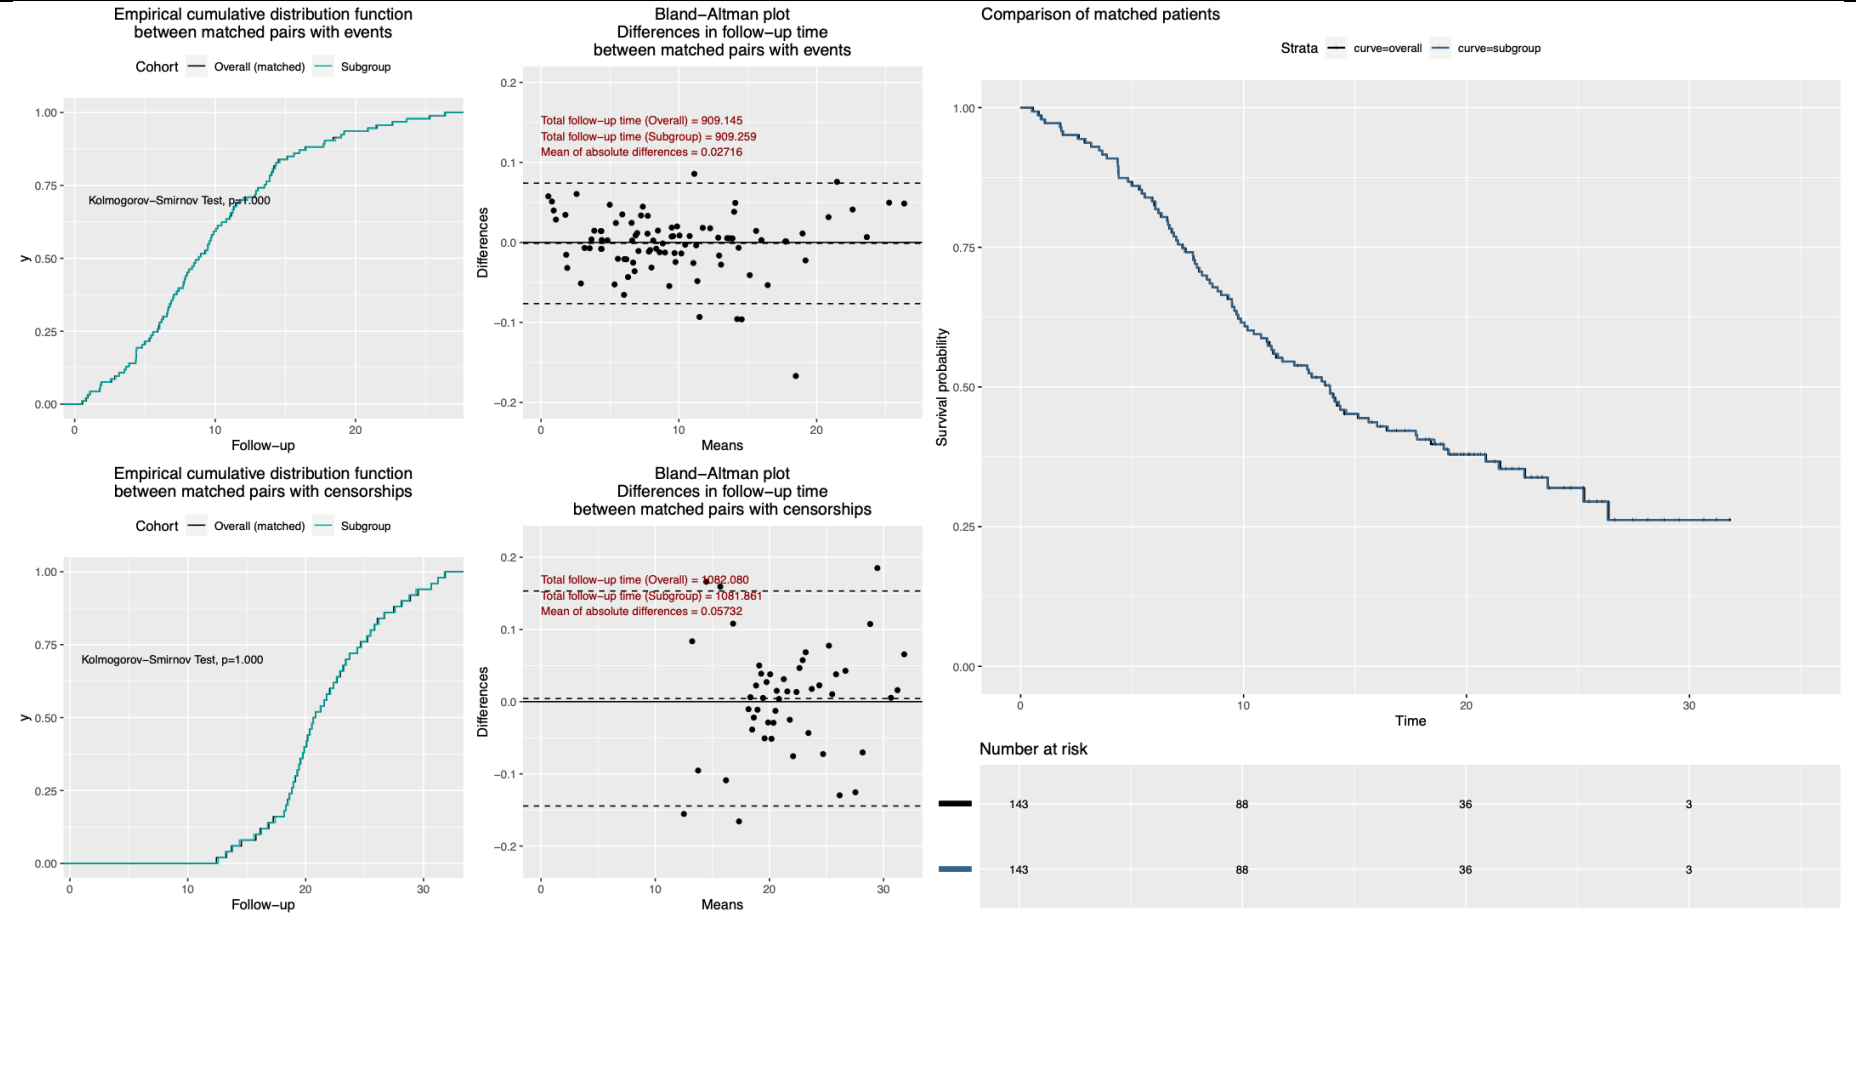

# ATTRACTION3 OS TPS $\geq 1\%$ (Chemo)

Empirical cumulative distribution between follow-up time of matched pairs and Bland-Altman plots to explore discrepancies between matched pairs

Kaplan Meier Curves and Cox-proportional hazard's model comparing matched pairs

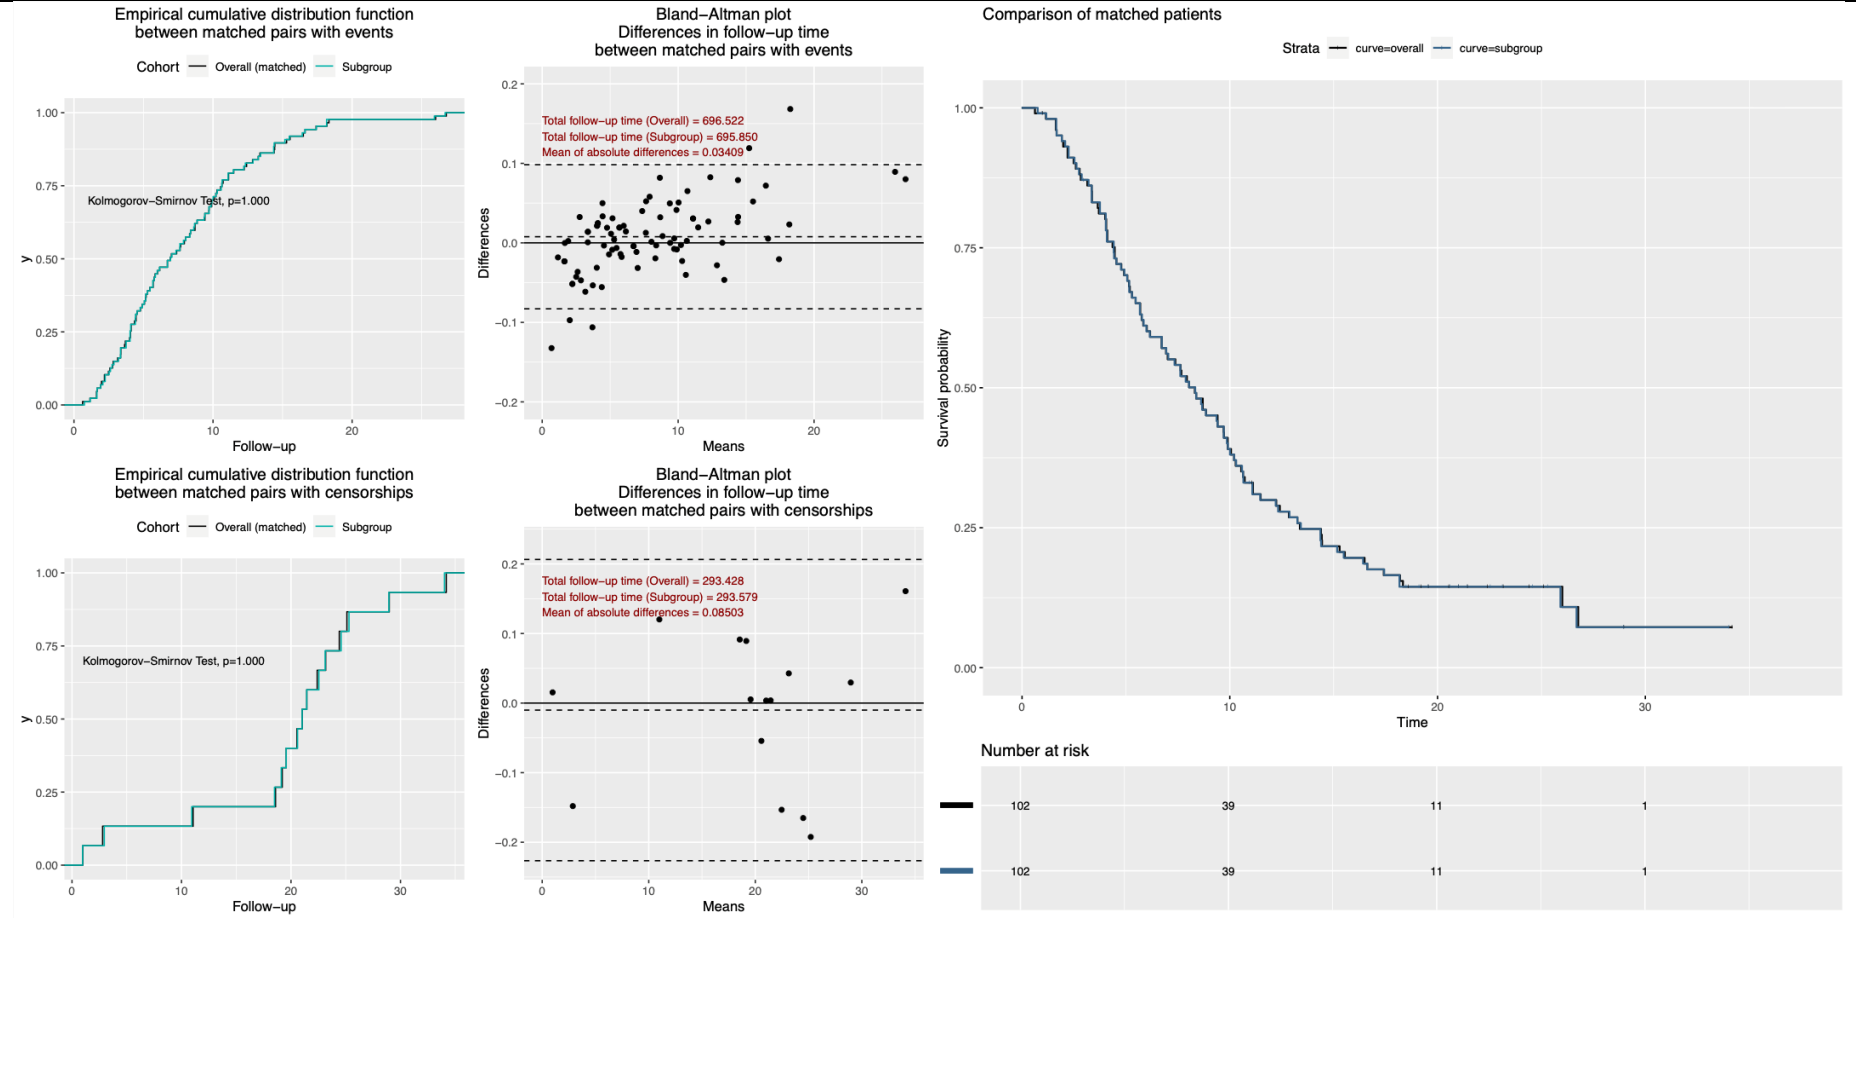

# ATTRACTION3 OS TPS $\geq 1\%$ (Nivo)

Empirical cumulative distribution between follow-up time of matched pairs and Bland-Altman plots to explore discrepancies between matched pairs

Kaplan Meier Curves and Cox-proportional hazard's model comparing matched pairs

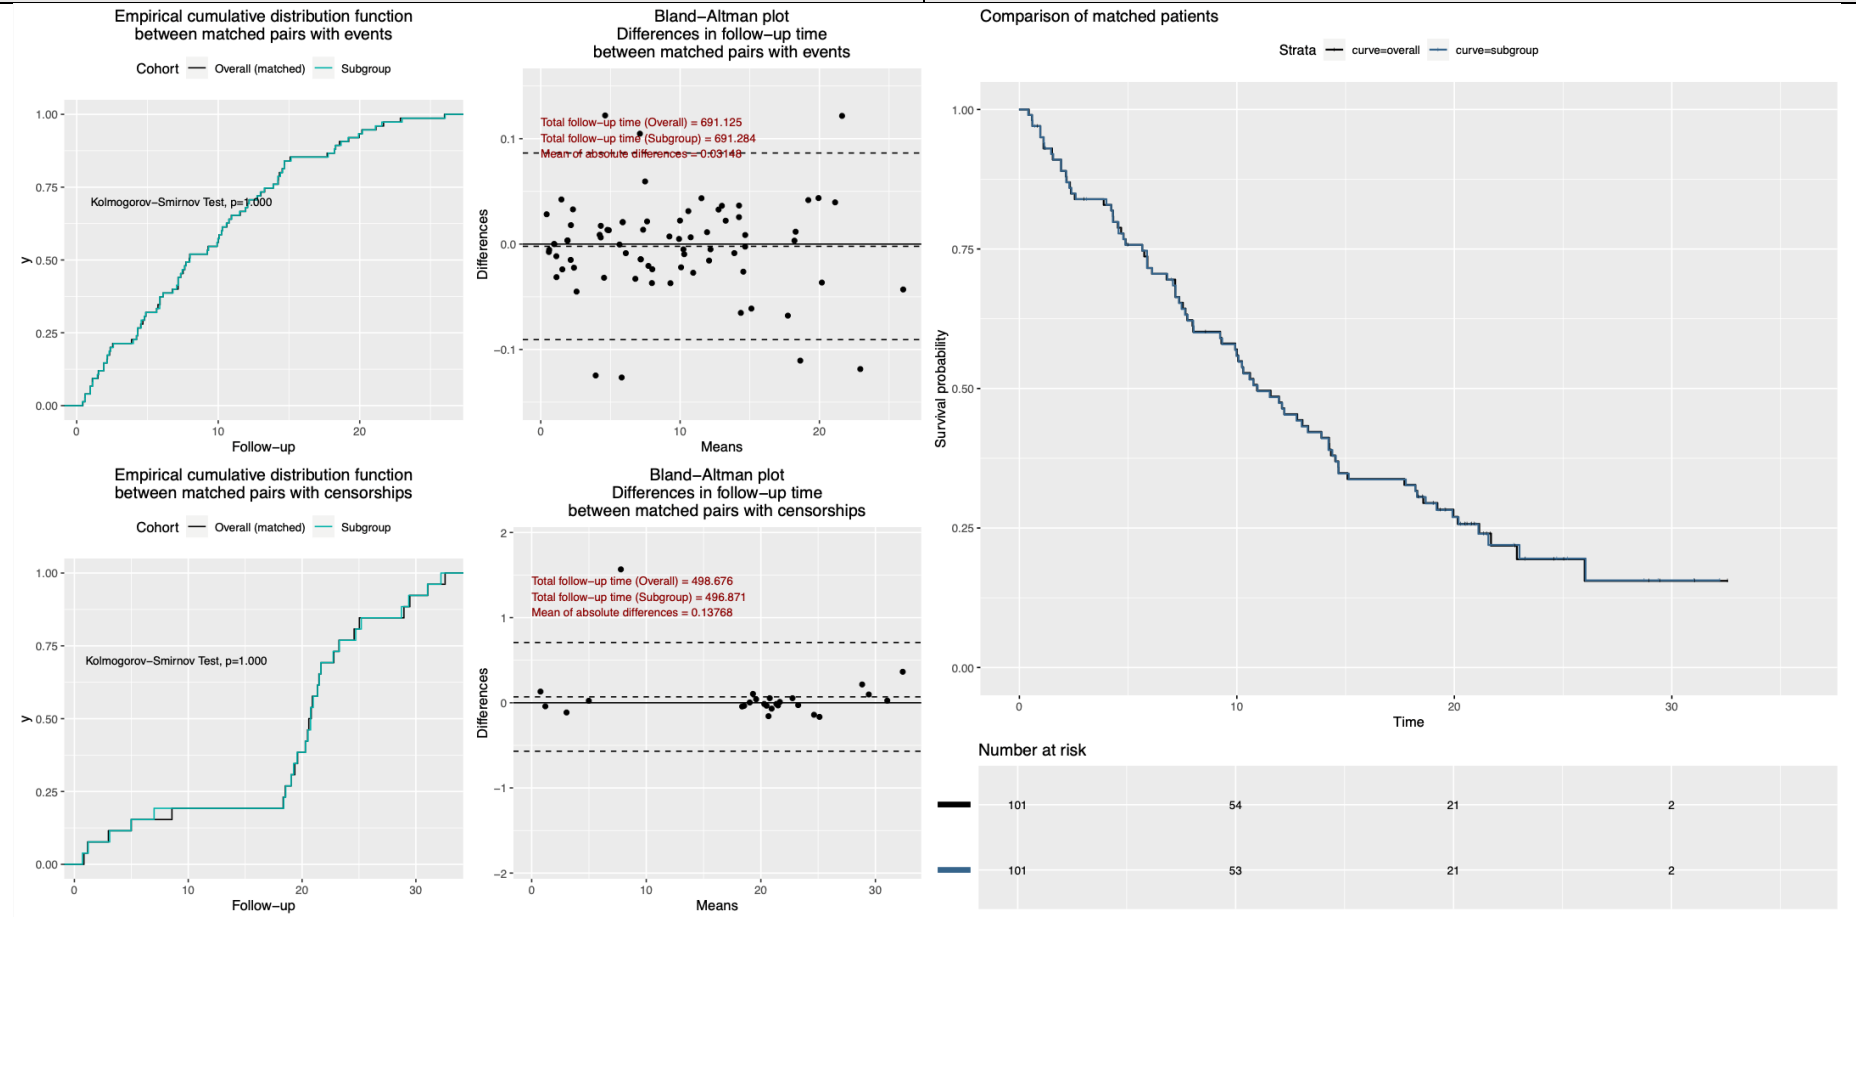

# ESCORT OS TPS $\geq 1\%$ (Chemo)

Empirical cumulative distribution between follow-up time of matched pairs and Bland-Altman plots to explore discrepancies between matched pairs

Kaplan Meier Curves and Cox-proportional hazard's model comparing matched pairs

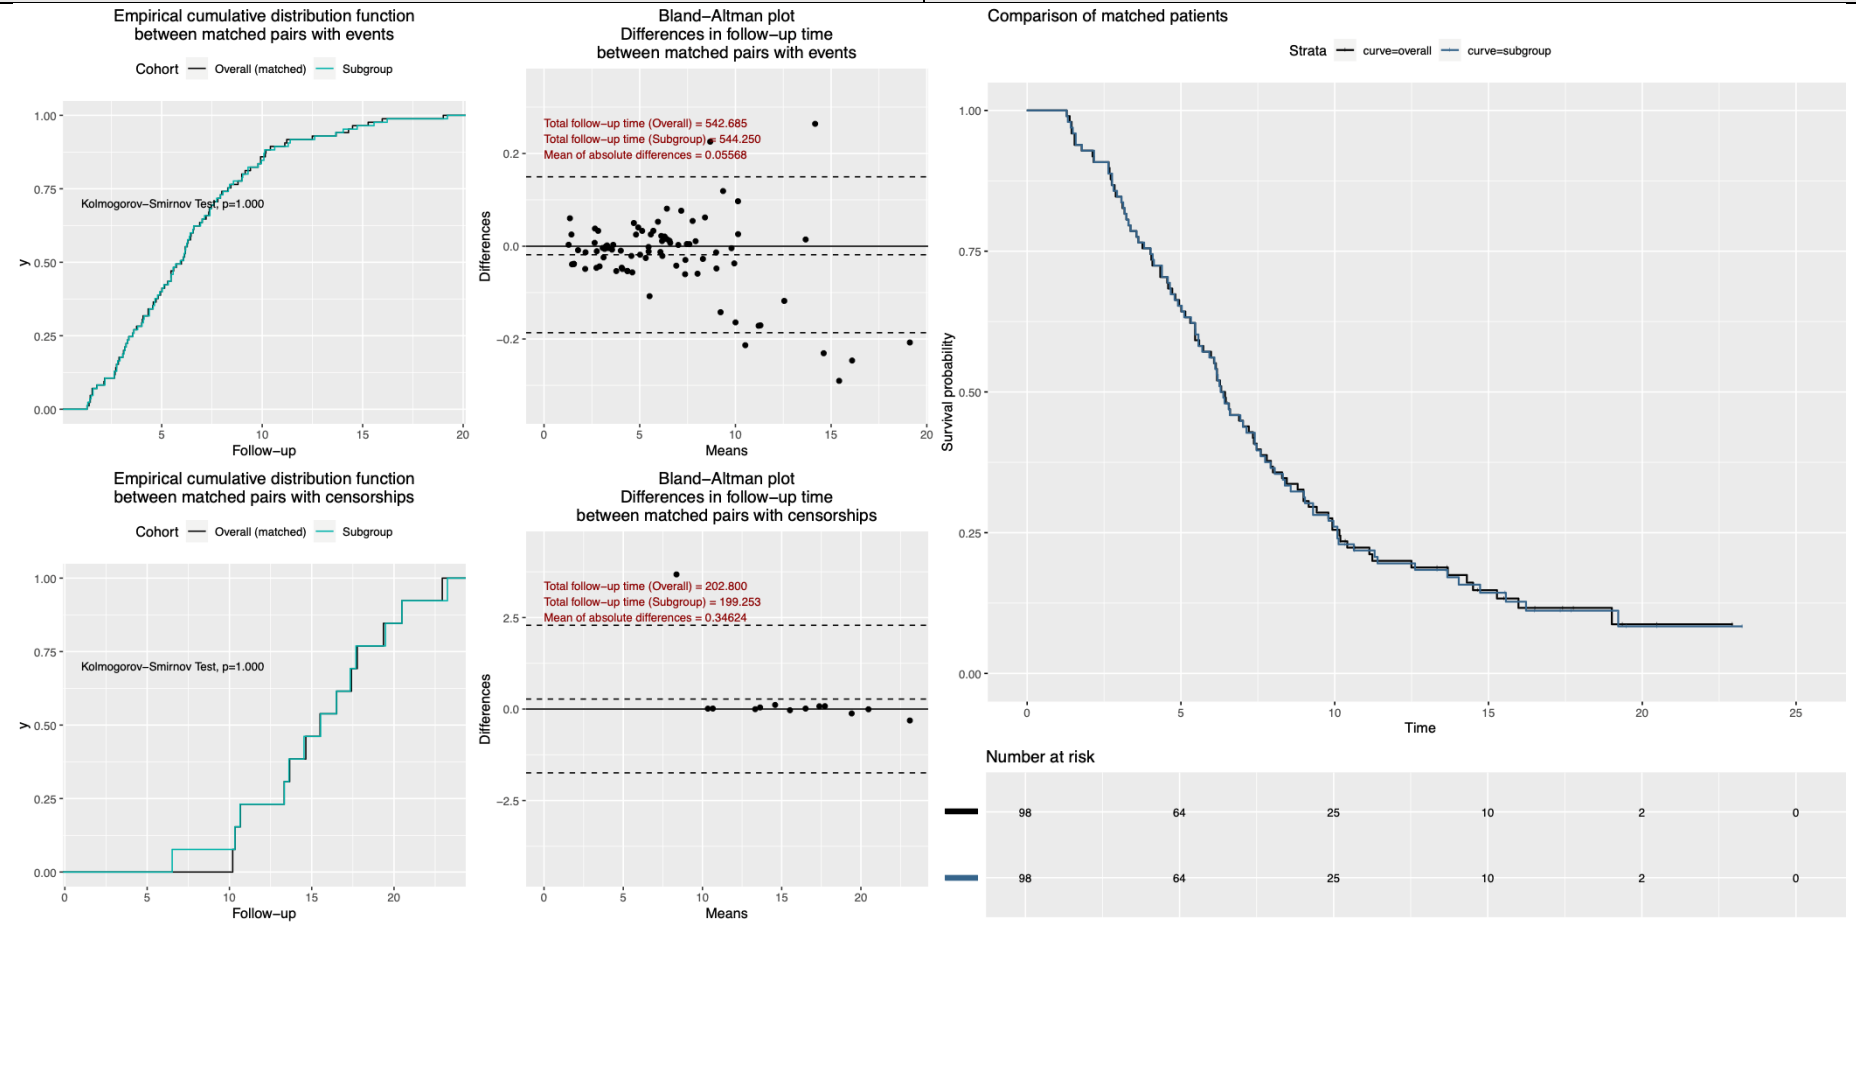



# ESCORT OS TPS $\geq 1\%$ (Camre)

Empirical cumulative distribution between follow-up time of matched pairs and Bland-Altman plots to explore discrepancies between matched pairs

Kaplan Meier Curves and Cox-proportional hazard's model comparing matched pairs

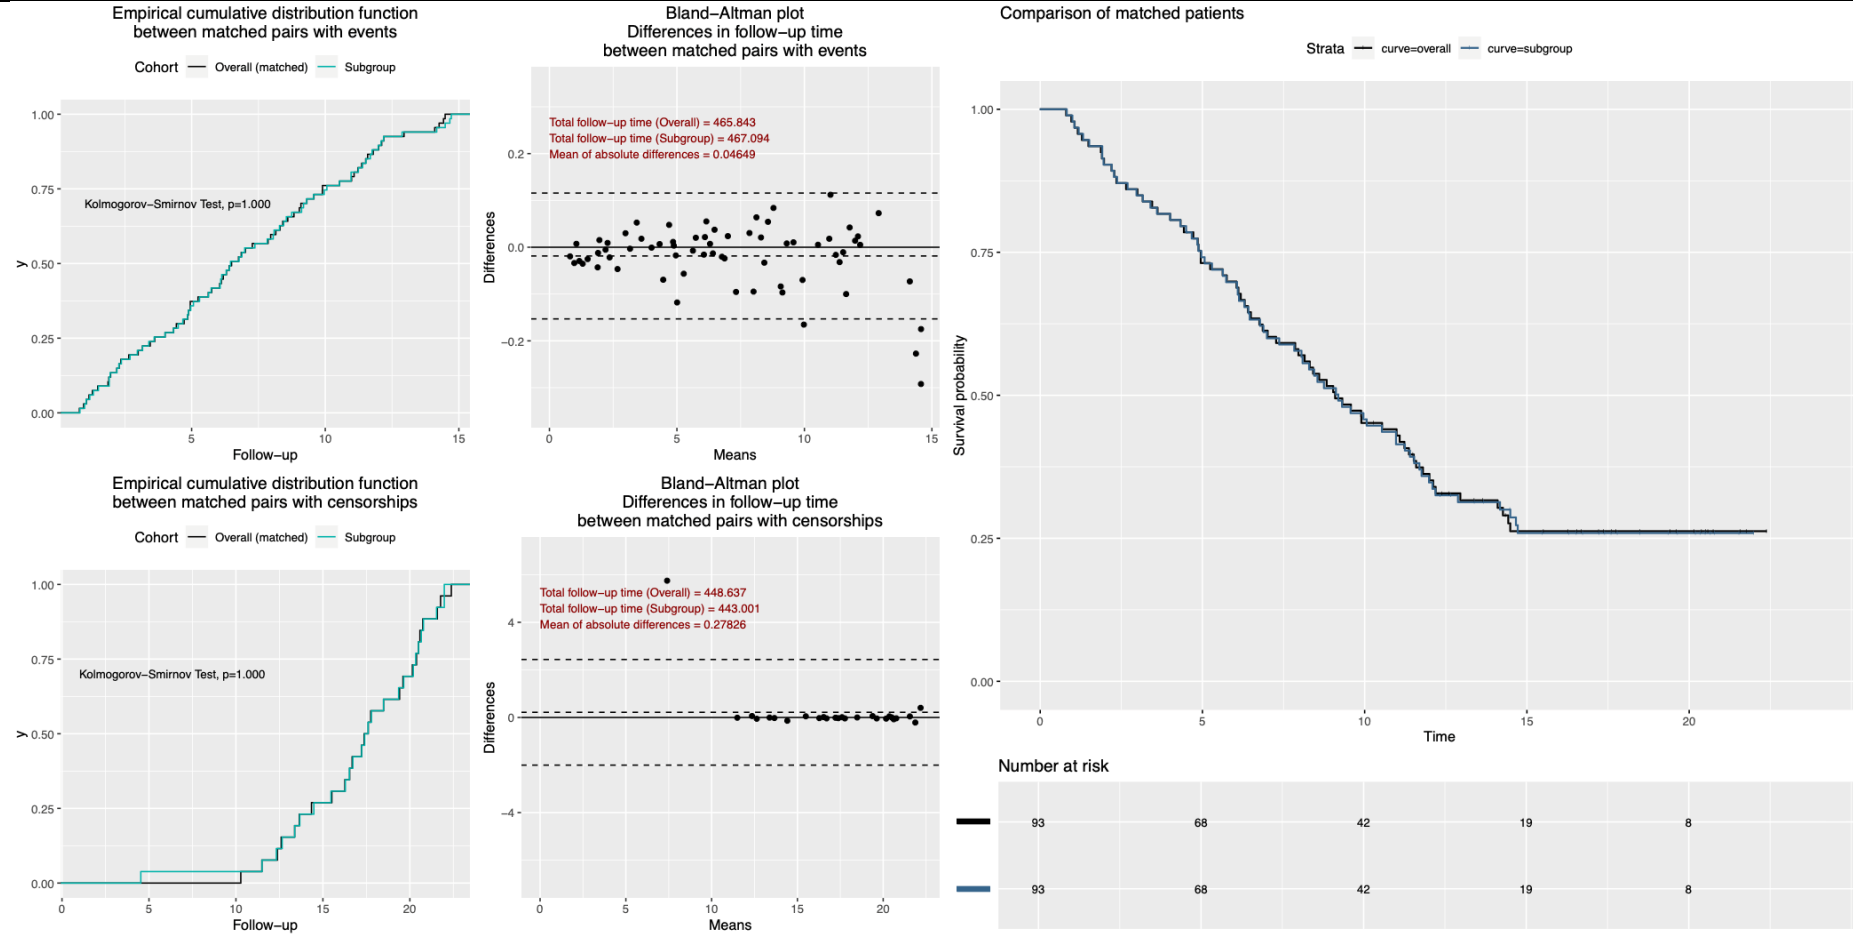

Abbreviations: Nivo, nivolumab; Ipi, ipilimumab; Camre, camrelizumab; Pembro, pembrolizumab; Sinti, sintilimab; Tisle, Tislelizumab; Chemo, chemotherapy; CPS, combined positive score; TPS, tumor proportion score; TAP, tumor area positivity; CM648, CheckMate 648; KN590, KEYNOTE-590; KN181, KEYNOTE-181.

**eFigure 6. Convergence Plots and Histograms of Simulations**

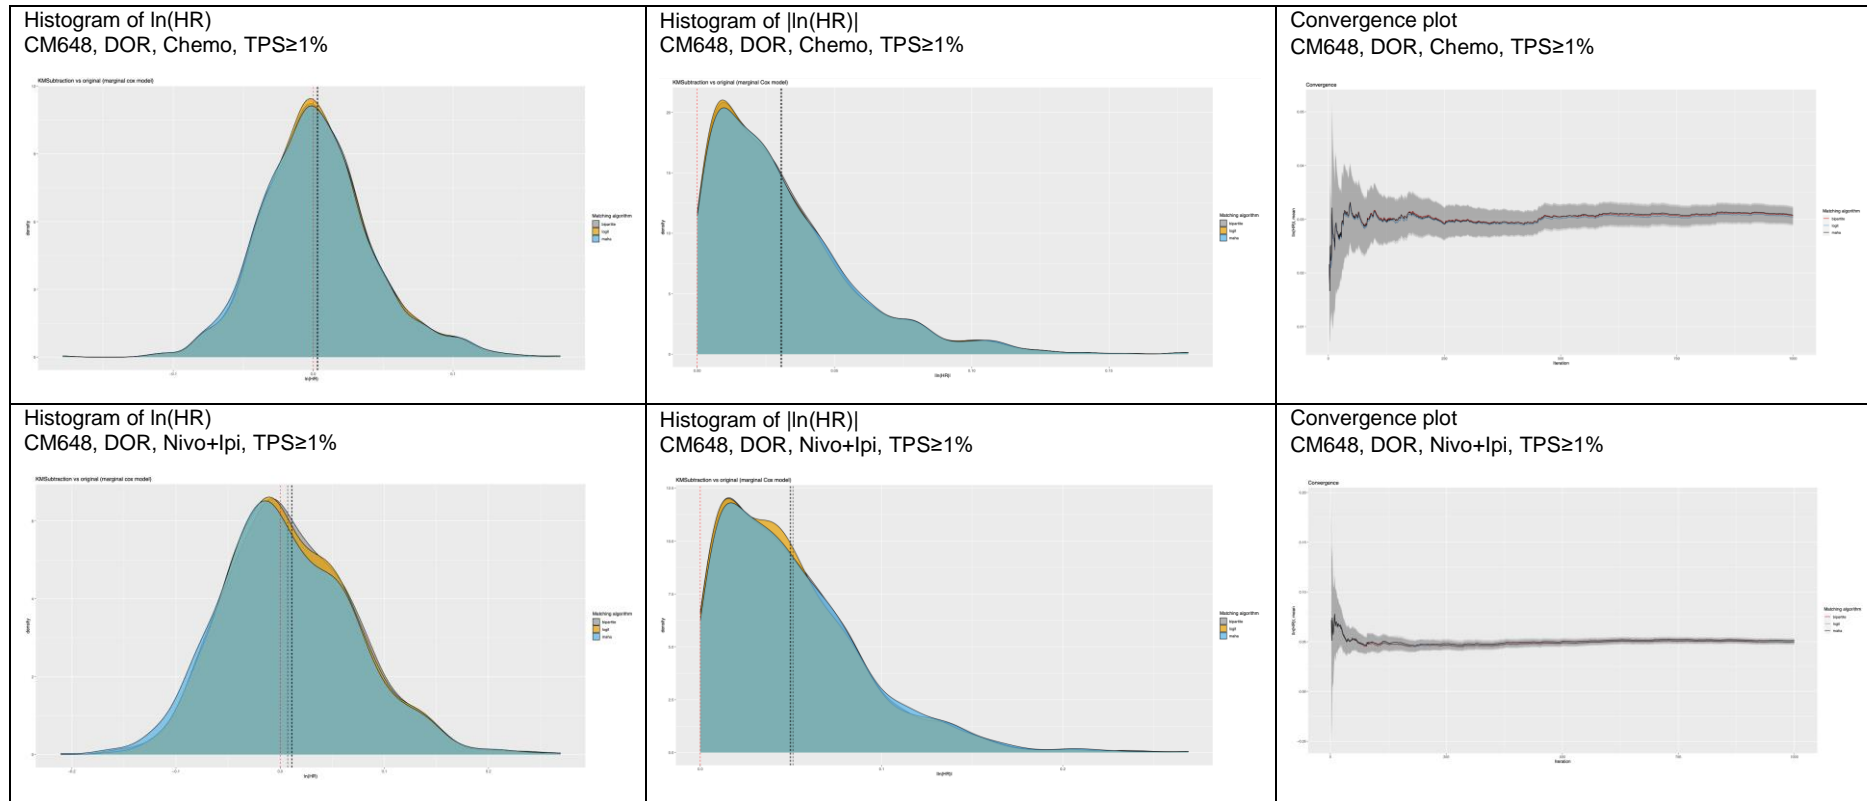

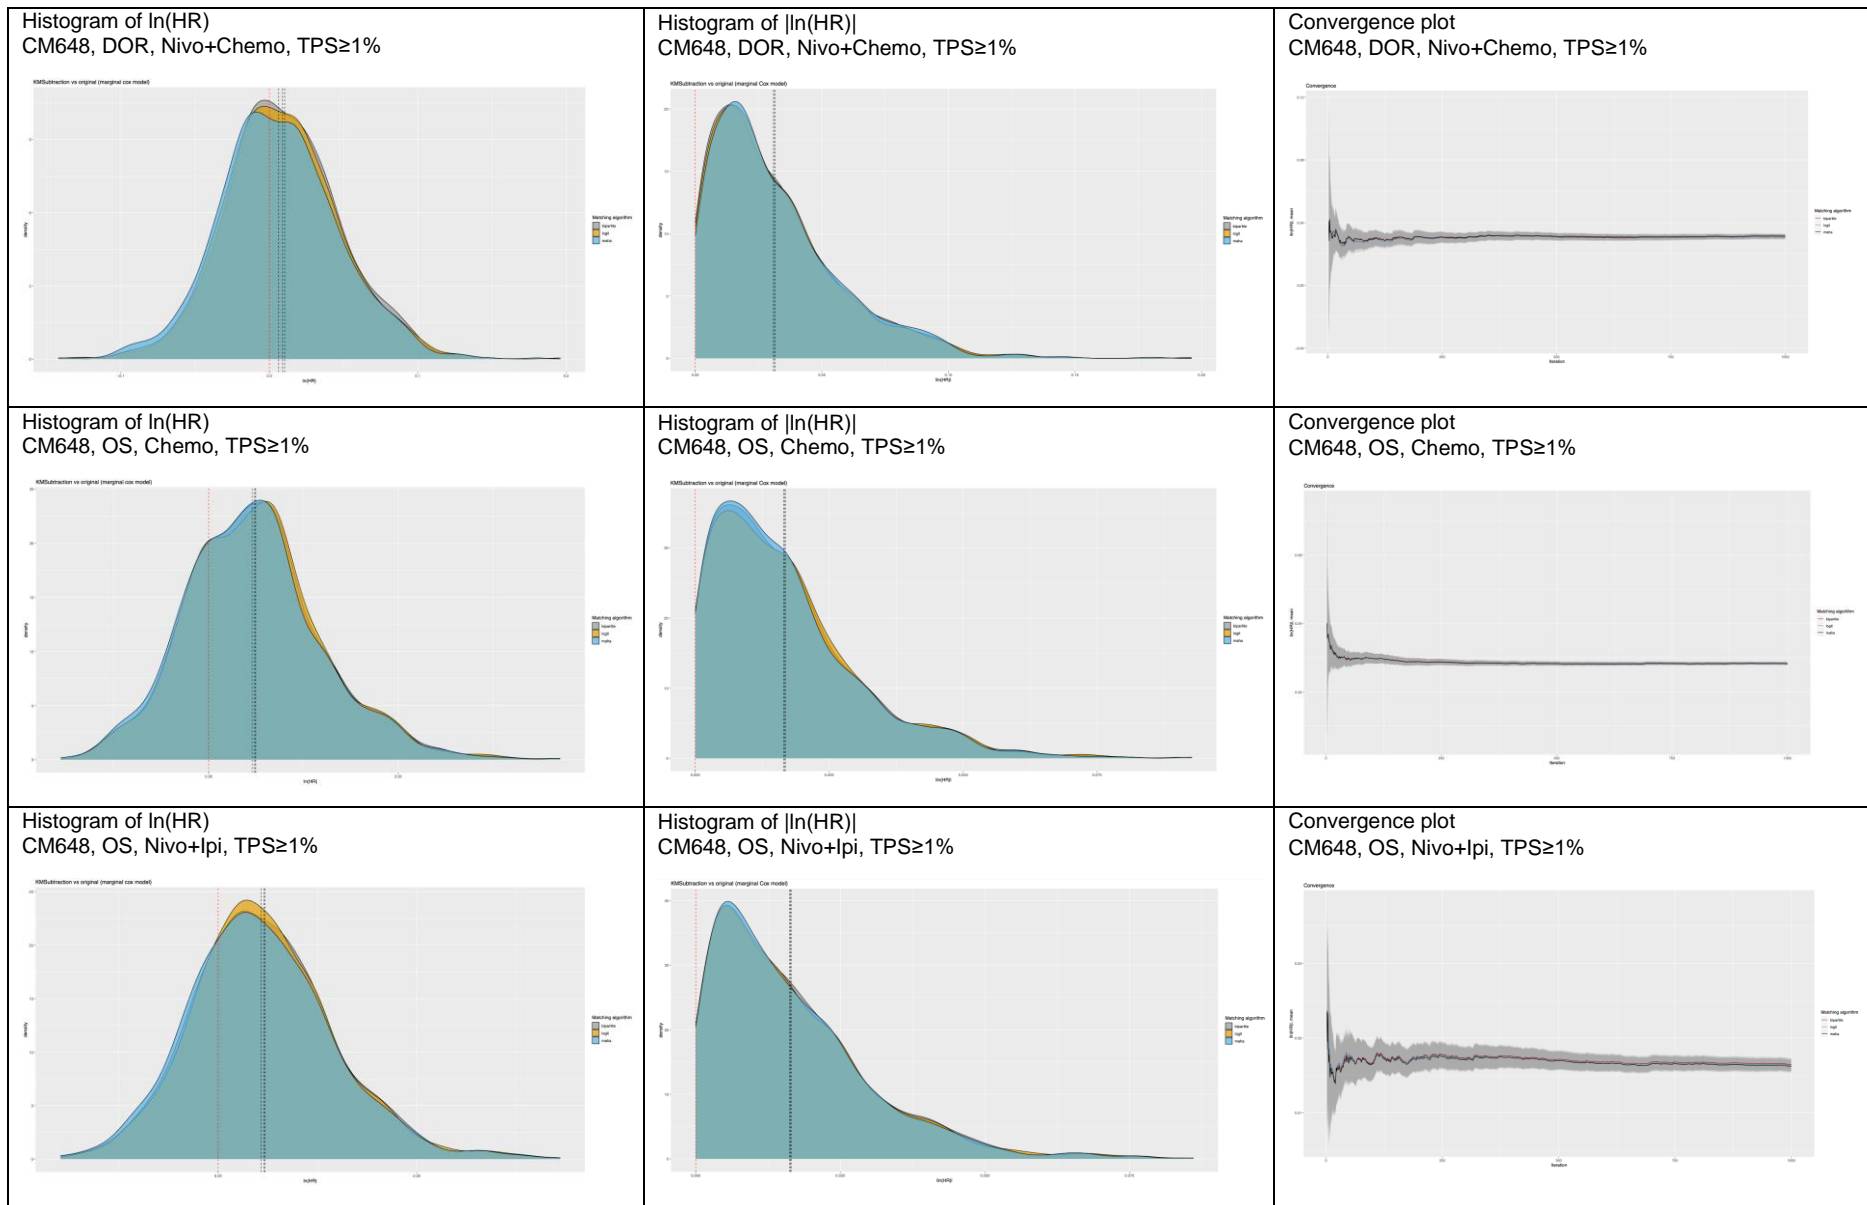

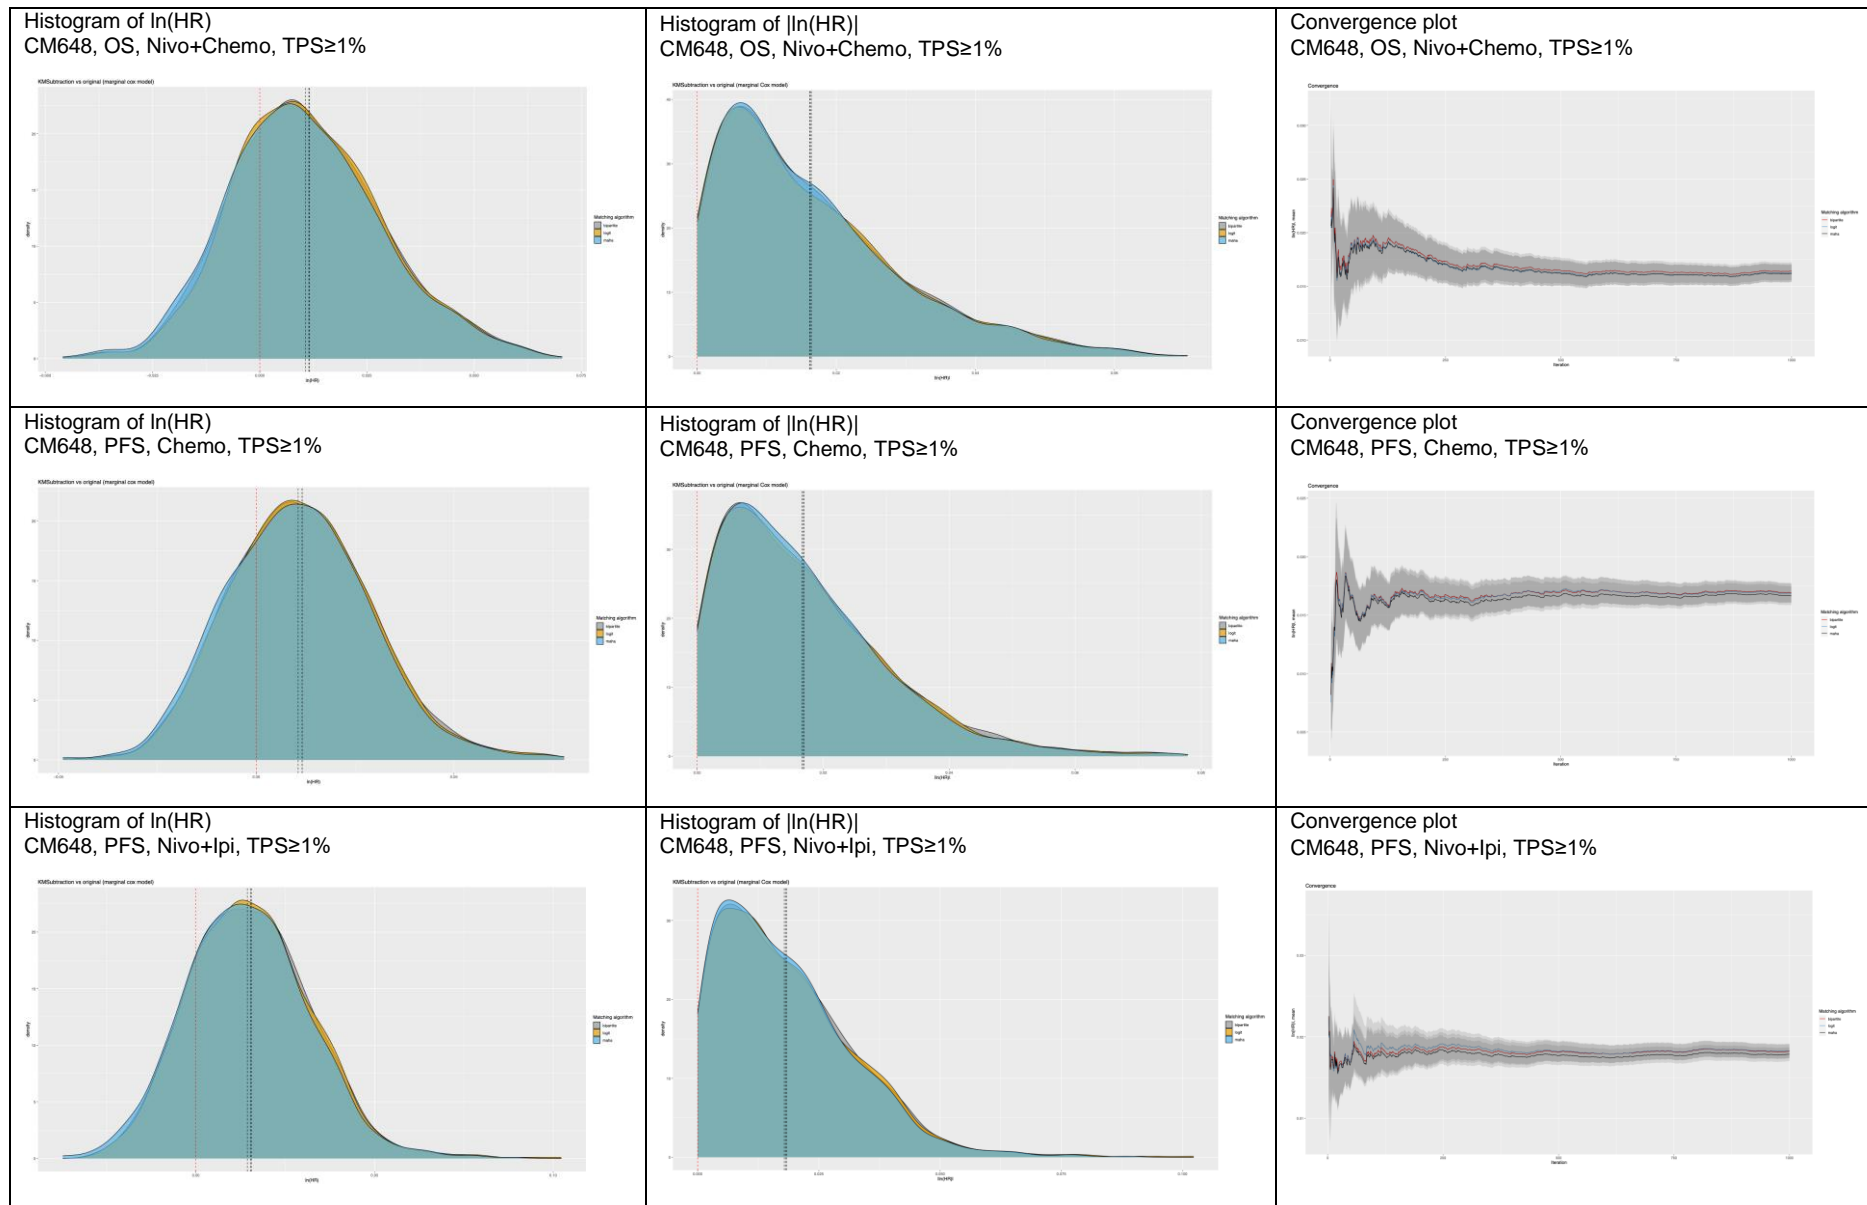

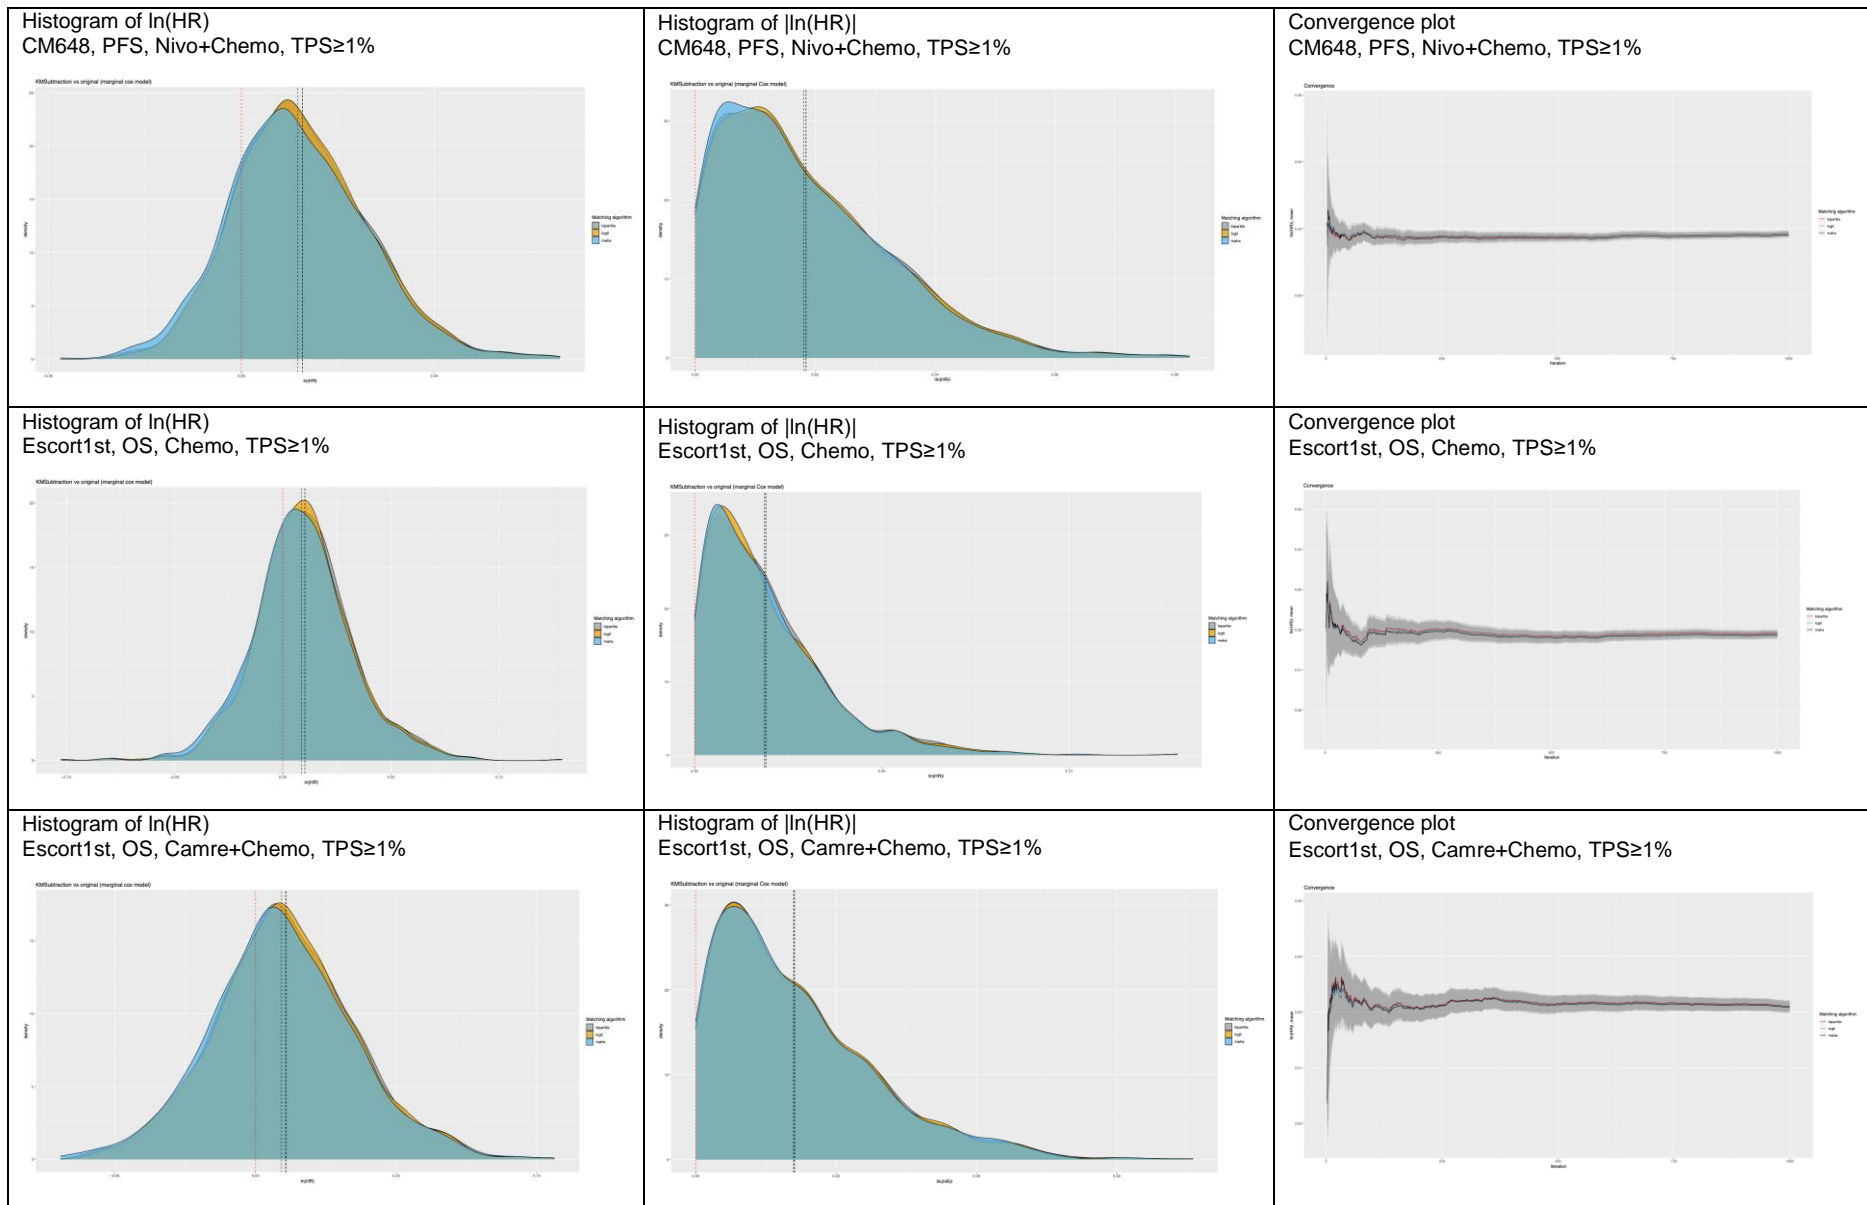

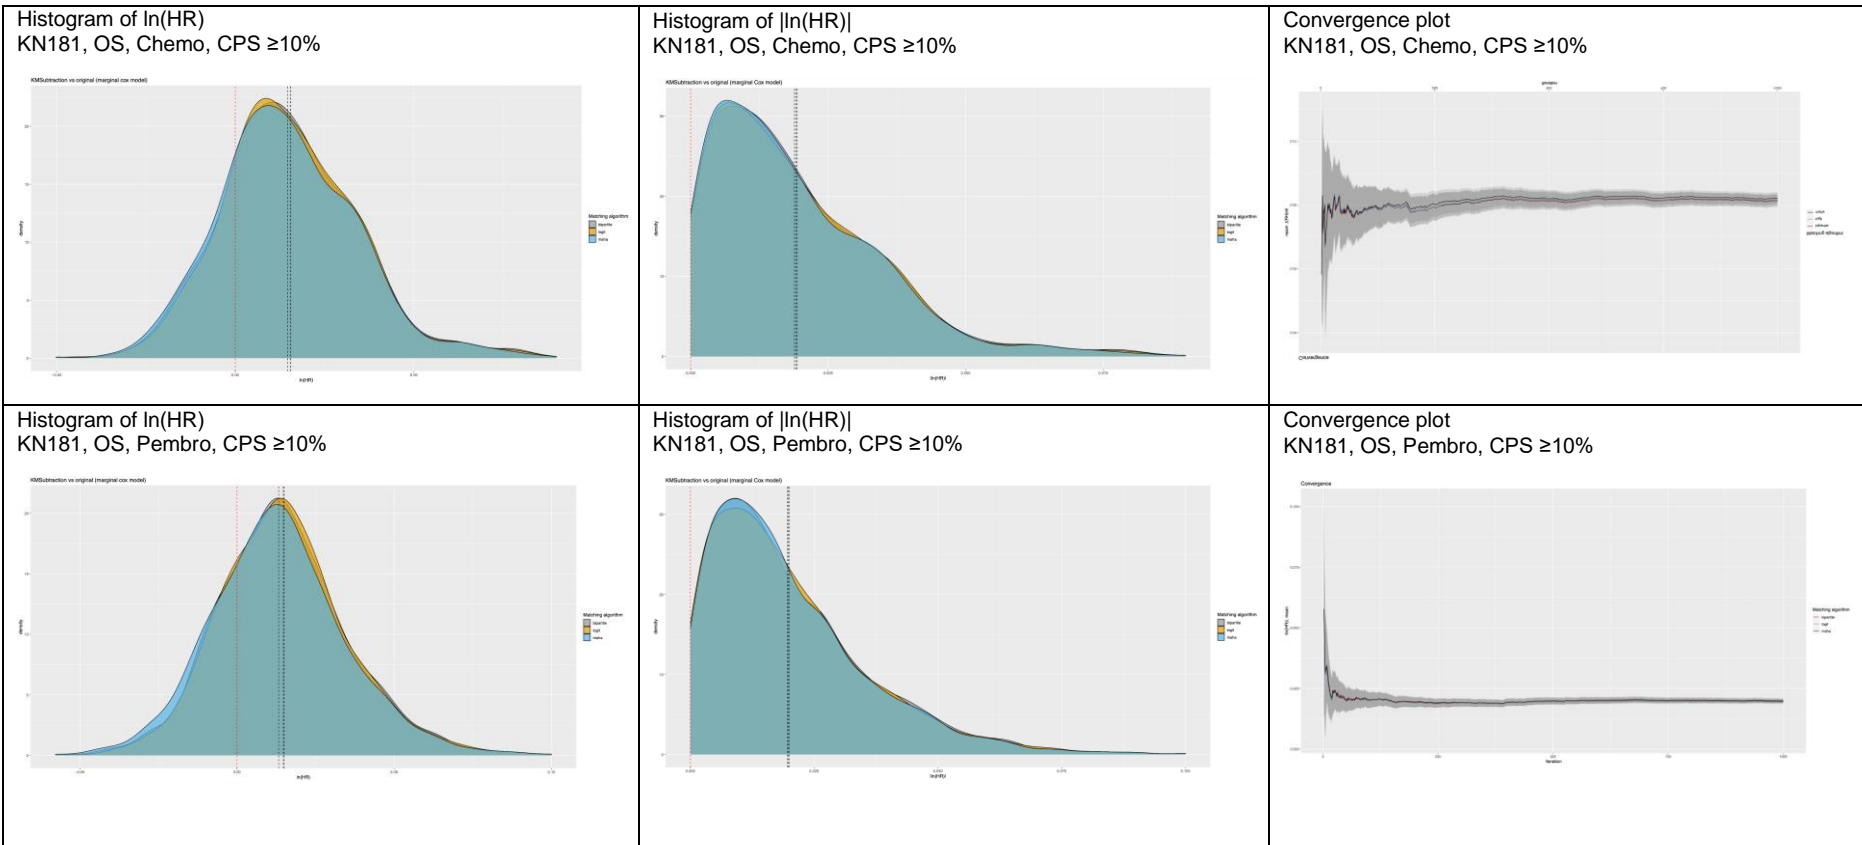

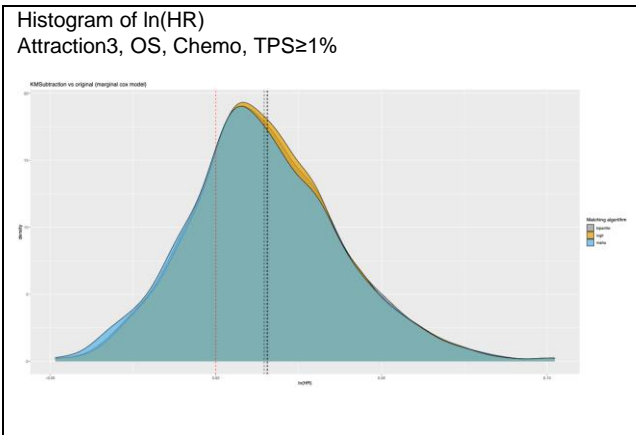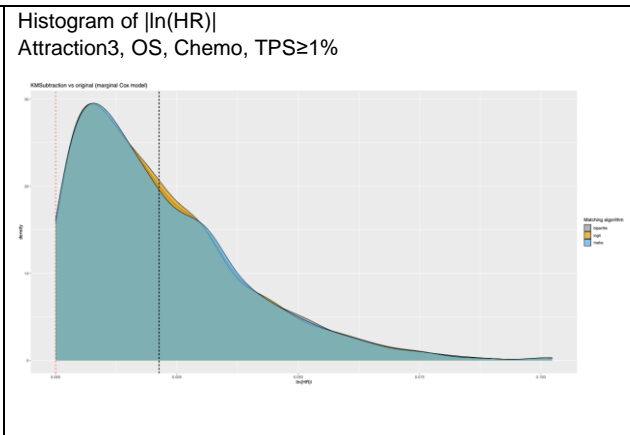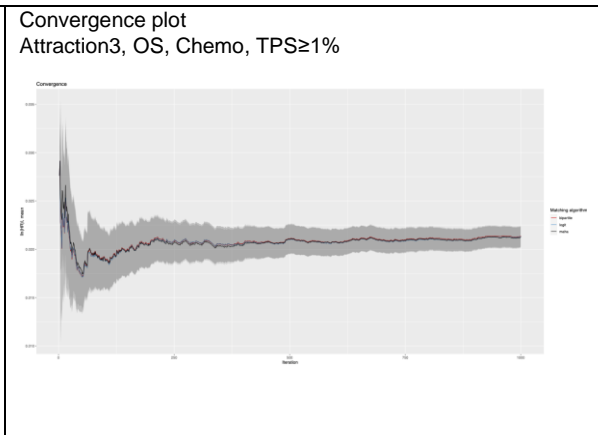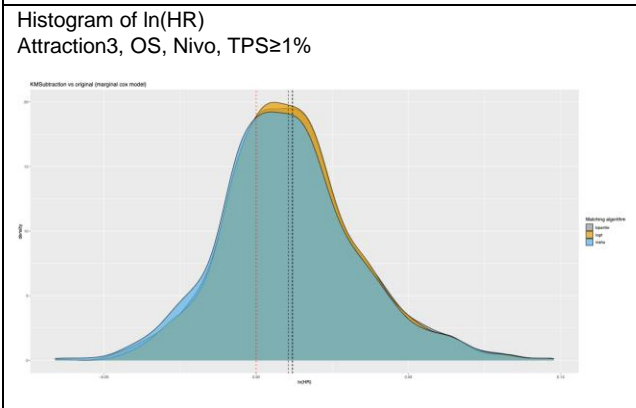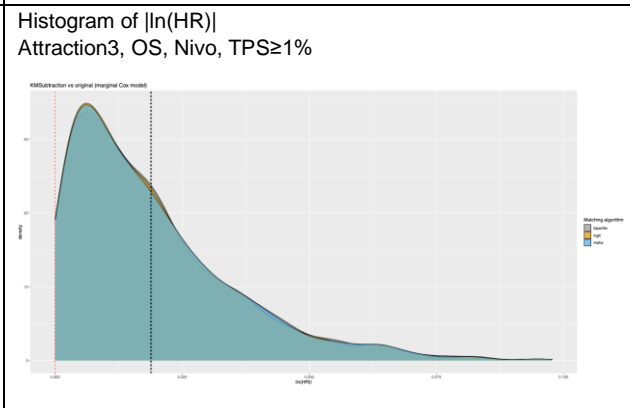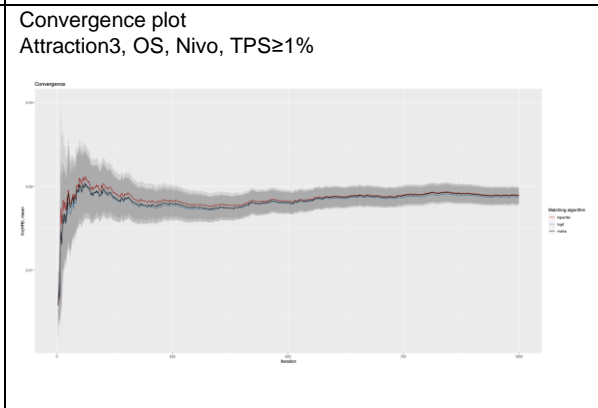

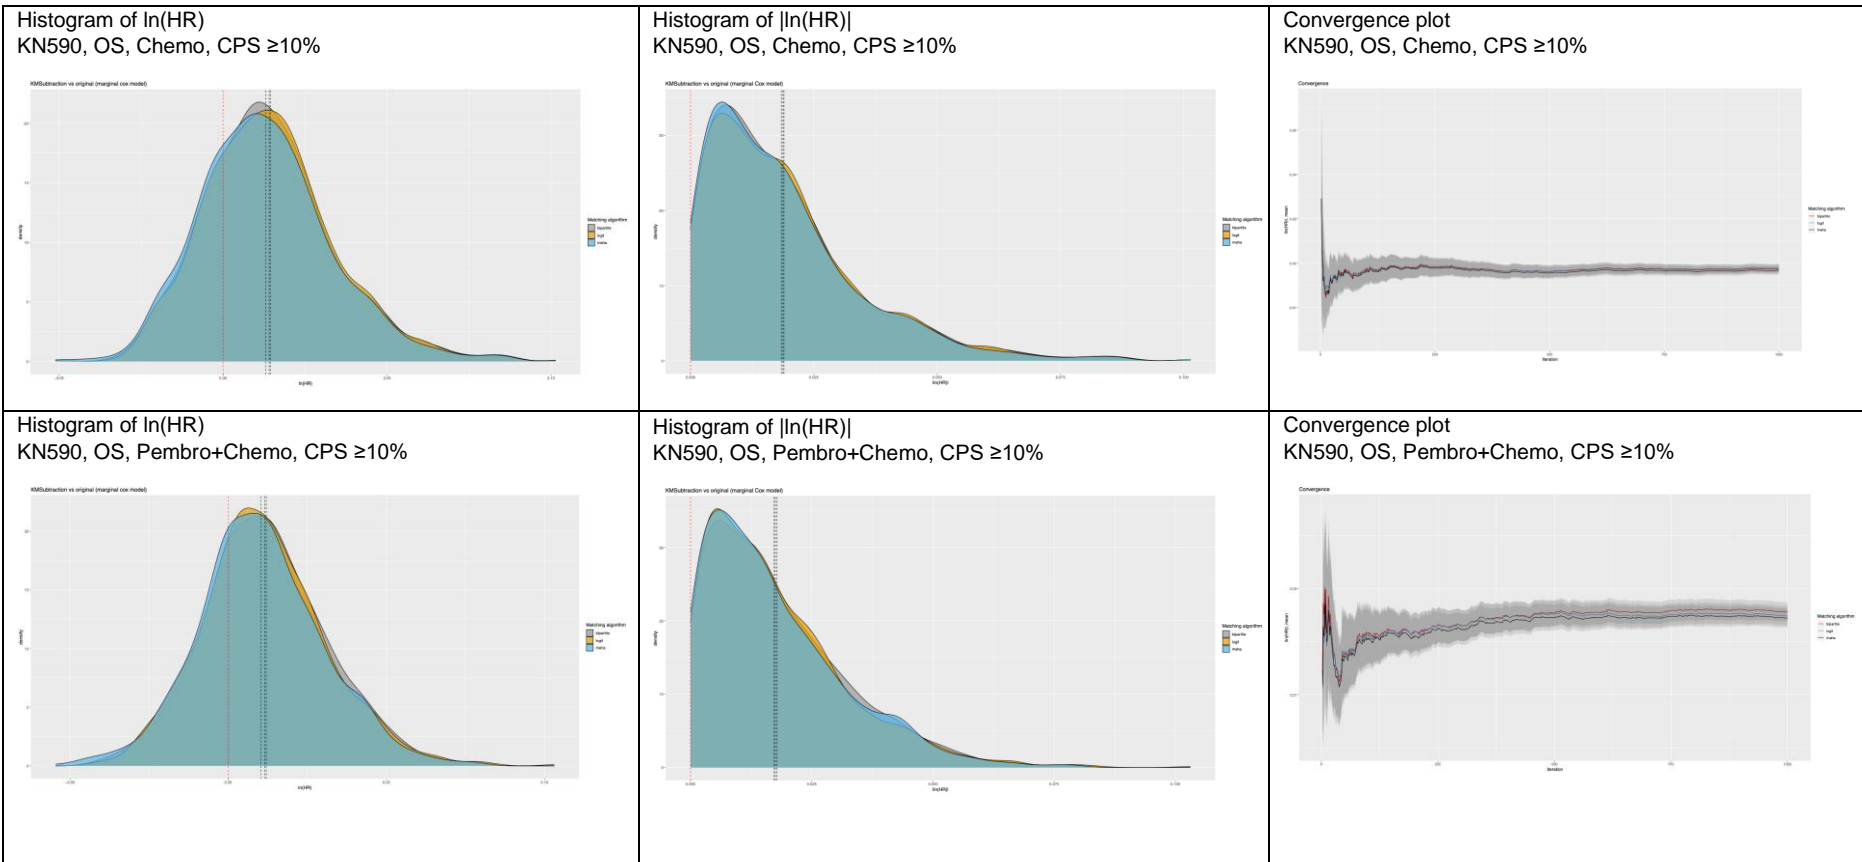



Histogram of  $\ln(\text{HR})$   
 RATIONALE302, OS, Chemo, TAP  $\geq 10\%$

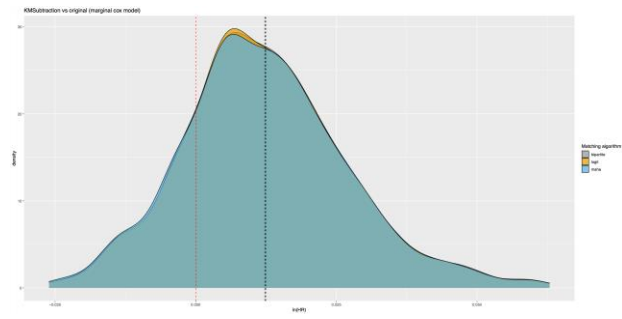

Histogram of  $|\ln(\text{HR})|$   
 RATIONALE302, OS, Chemo, TAP  $\geq 10\%$

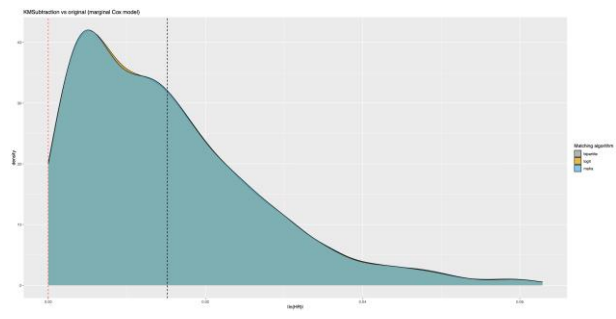

Convergence plot  
 RATIONALE302, OS, Chemo, TAP  $\geq 10\%$

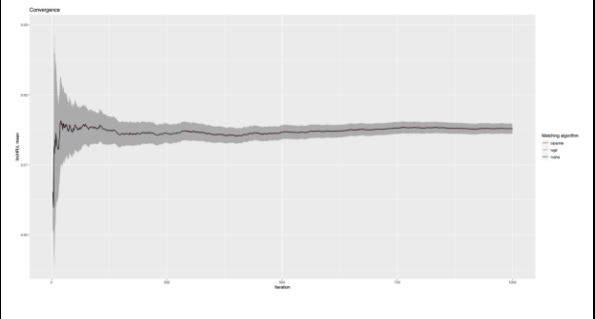

Histogram of  $\ln(\text{HR})$   
 RATIONALE302, OS, Tisle, TAP  $\geq 10\%$

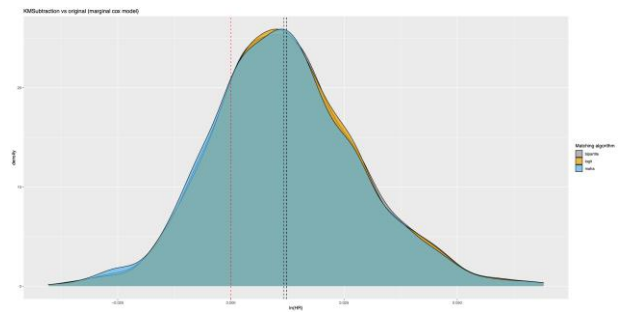

Histogram of  $|\ln(\text{HR})|$   
 RATIONALE302, OS, Tisle, TAP  $\geq 10\%$

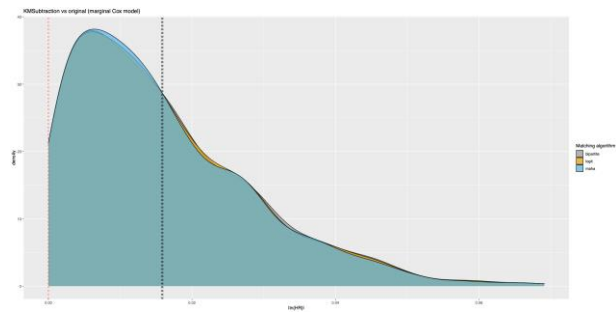

Convergence plot  
 RATIONALE302, OS, Tisle, TAP  $\geq 10\%$

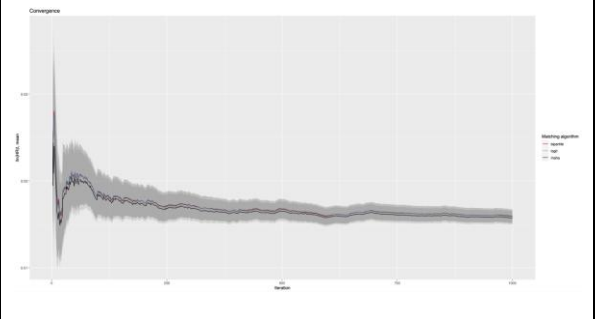

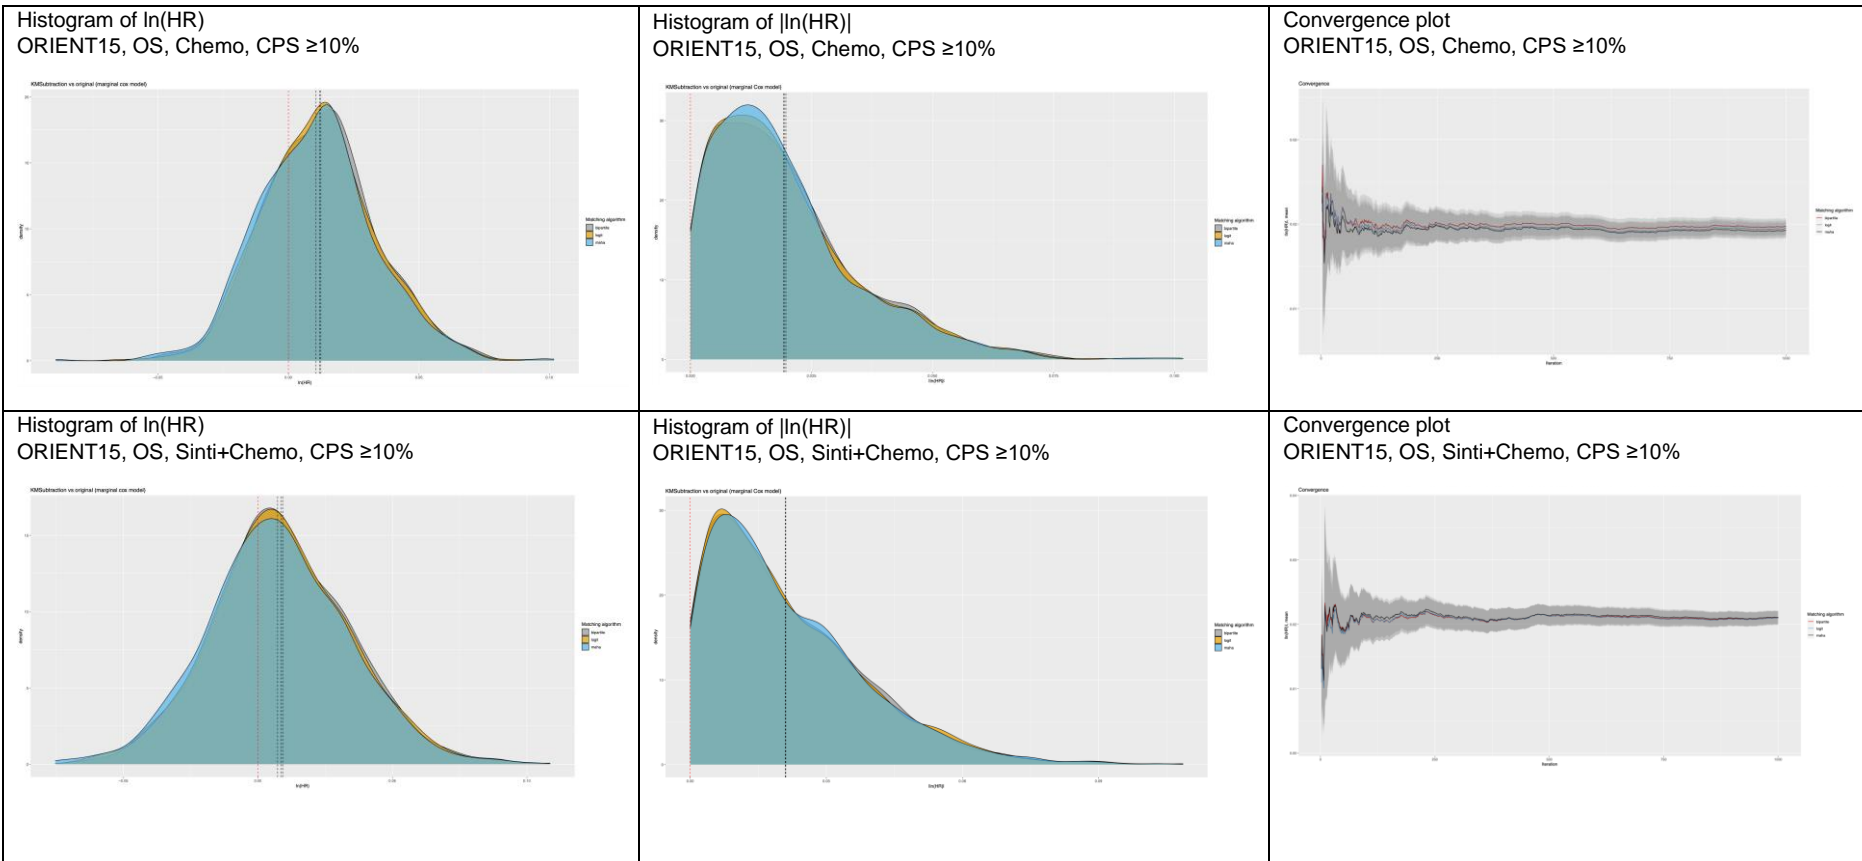

Histogram of  $\ln(\text{HR})$   
ORIENT15, PFS, Chemo, CPS  $\geq 10\%$

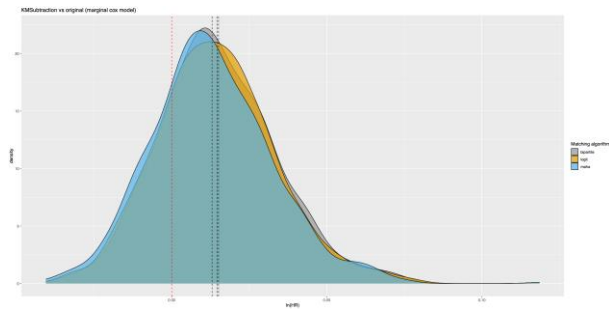

Histogram of  $|\ln(\text{HR})|$   
ORIENT15, PFS, Chemo, CPS  $\geq 10\%$

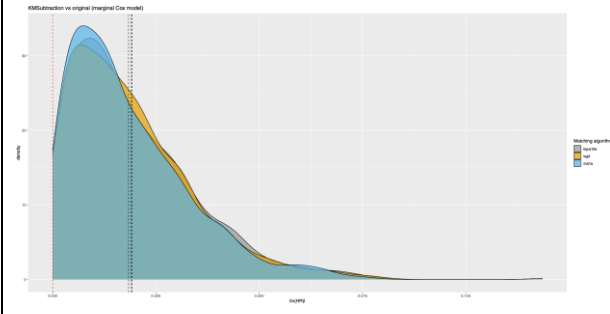

Convergence plot  
ORIENT15, PFS, Chemo, CPS  $\geq 10\%$

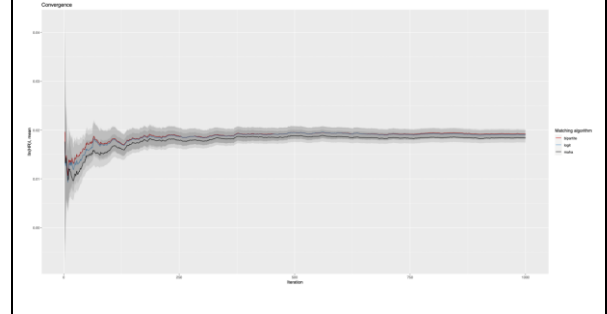

Histogram of  $\ln(\text{HR})$   
ORIENT15, PFS, Sinti+Chemo, CPS  $\geq 10\%$

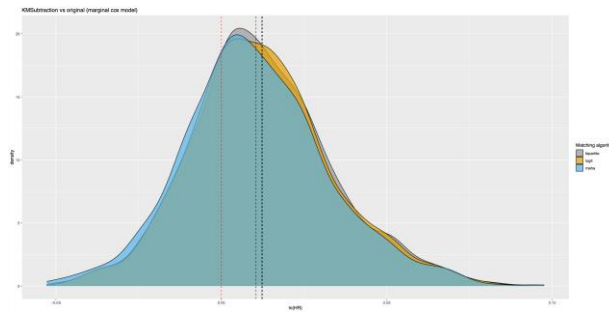

Histogram of  $|\ln(\text{HR})|$   
ORIENT15, PFS, Sinti+Chemo, CPS  $\geq 10\%$

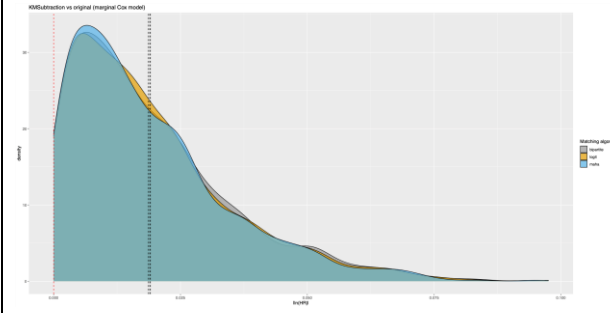

Convergence plot  
ORIENT15, PFS, Sinti+Chemo, CPS  $\geq 10\%$

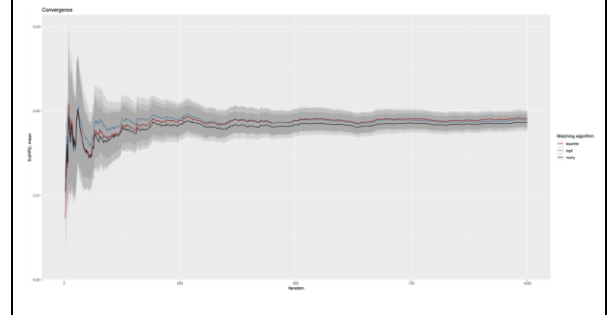

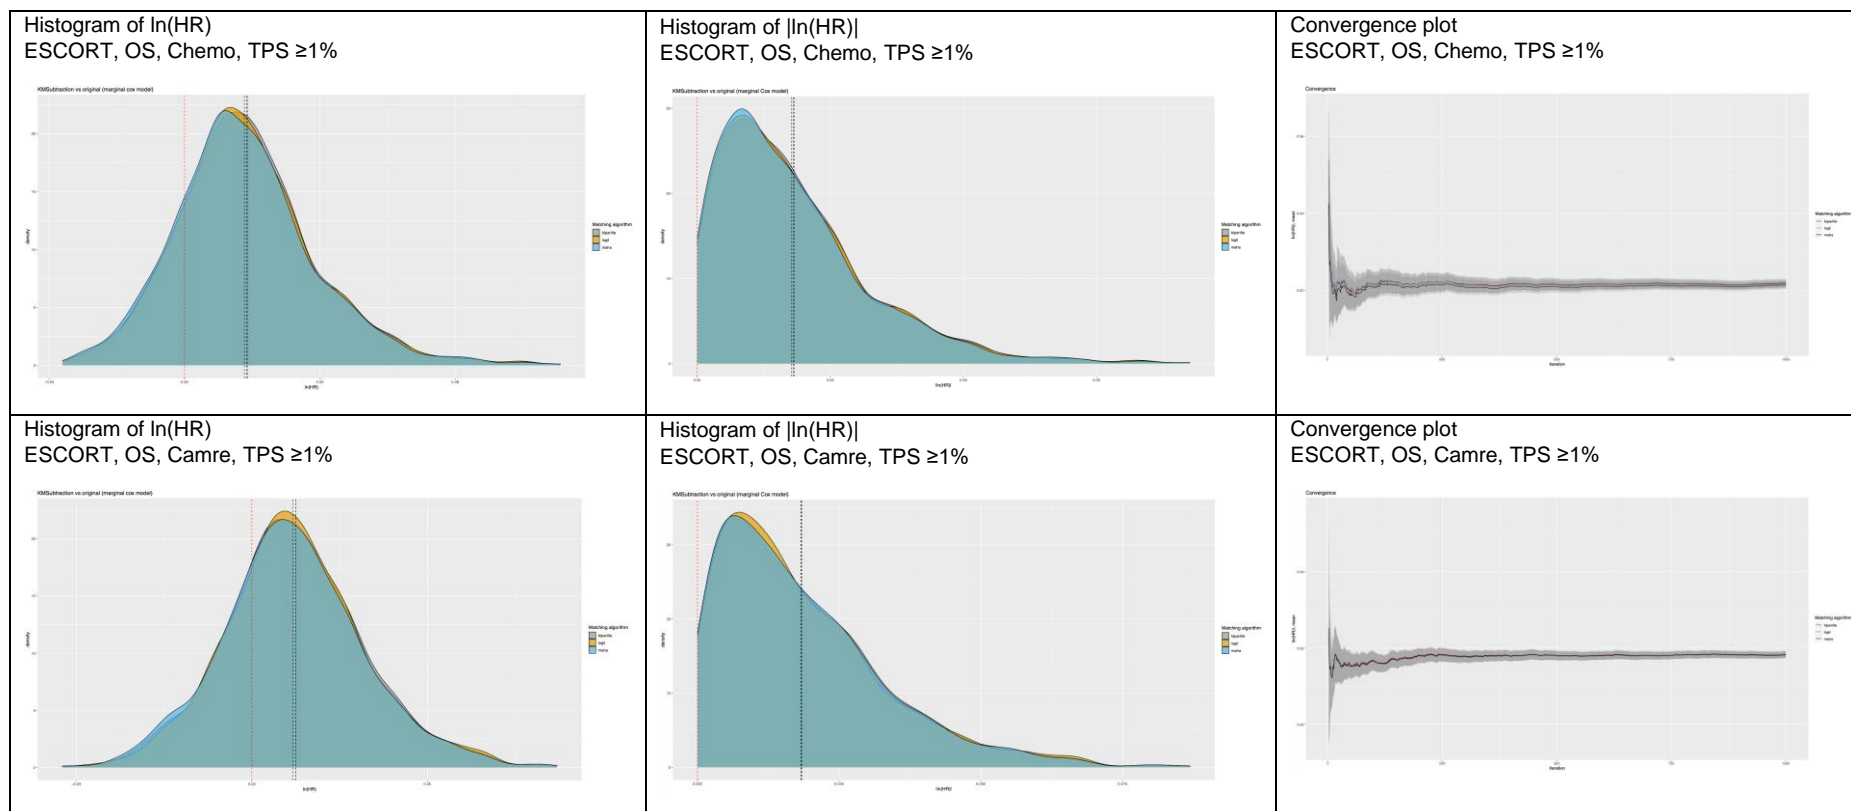

Convergence and histograms of simulations conducted for **eFigure 5** is demonstrated here. Abbreviations: Nivo, nivolumab; Ipi, ipilimumab; Camre, camrelizumab; Pembro, pembrolizumab; Sinti, sintilimab; Tisle, Tislelizumab; Chemo, chemotherapy; CPS, combined positive score; TPS, tumor proportion score; TAP, tumor area positivity; CM648, CheckMate 648; KN590, KEYNOTE-590; KN181, KEYNOTE-181.

**eFigure 7. One-Stage Pooled Analysis of First-line and Second-line Studies**

**7A** One-stage pooled analysis  
Overall Survival  
CM648, ESCORT1st, KN590, ORIENT15

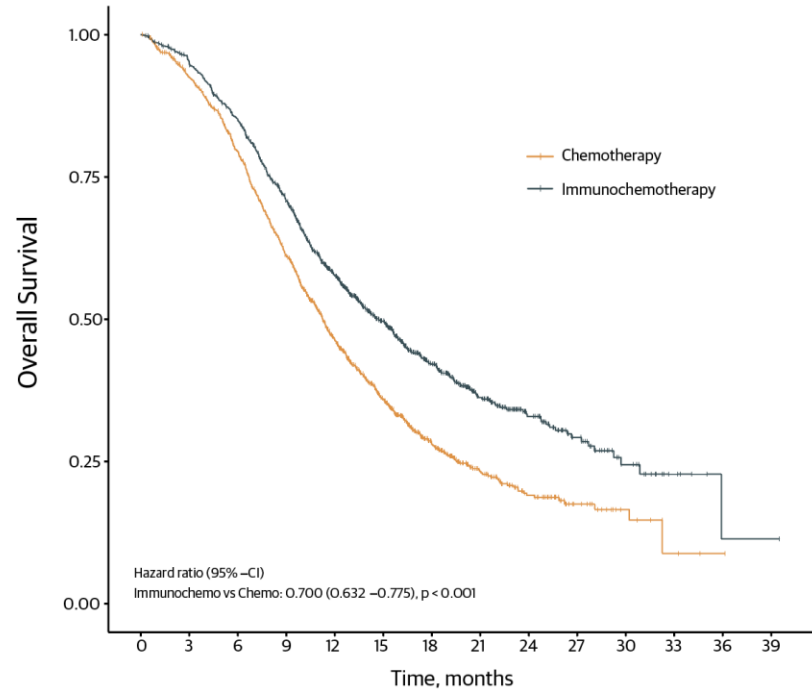

|   |      |      |      |     |     |     |     |     |    |    |    |   |   |   |
|---|------|------|------|-----|-----|-----|-----|-----|----|----|----|---|---|---|
| — | 1228 | 1110 | 938  | 701 | 471 | 311 | 158 | 92  | 52 | 22 | 9  | 3 | 1 | 0 |
| — | 1220 | 1144 | 1017 | 816 | 591 | 420 | 266 | 135 | 78 | 42 | 18 | 6 | 1 | 1 |

**7B** One-stage pooled analysis  
Progression Free Survival  
CM648, ESCORT1st, KN590, ORIENT15

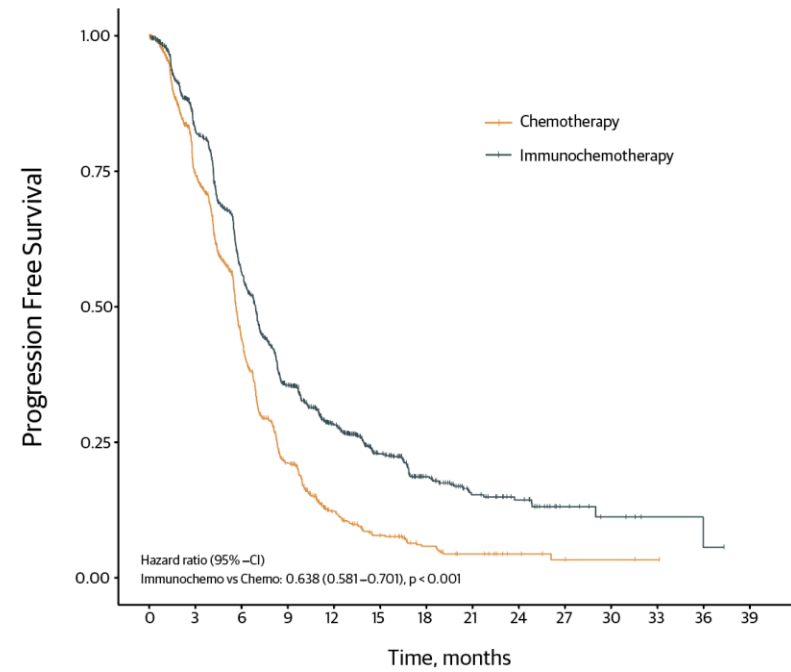

|   |      |     |     |     |     |     |    |    |    |    |   |   |   |   |
|---|------|-----|-----|-----|-----|-----|----|----|----|----|---|---|---|---|
| — | 1228 | 807 | 430 | 183 | 77  | 40  | 21 | 12 | 6  | 3  | 2 | 1 | 0 | 0 |
| — | 1220 | 931 | 605 | 339 | 222 | 140 | 70 | 38 | 26 | 10 | 5 | 2 | 1 | 0 |

7C

One-stage pooled analysis  
Overall Survival  
ESCORT, RATIONALE-302, KN-181, ATTRACTION-3, ORIENT-2

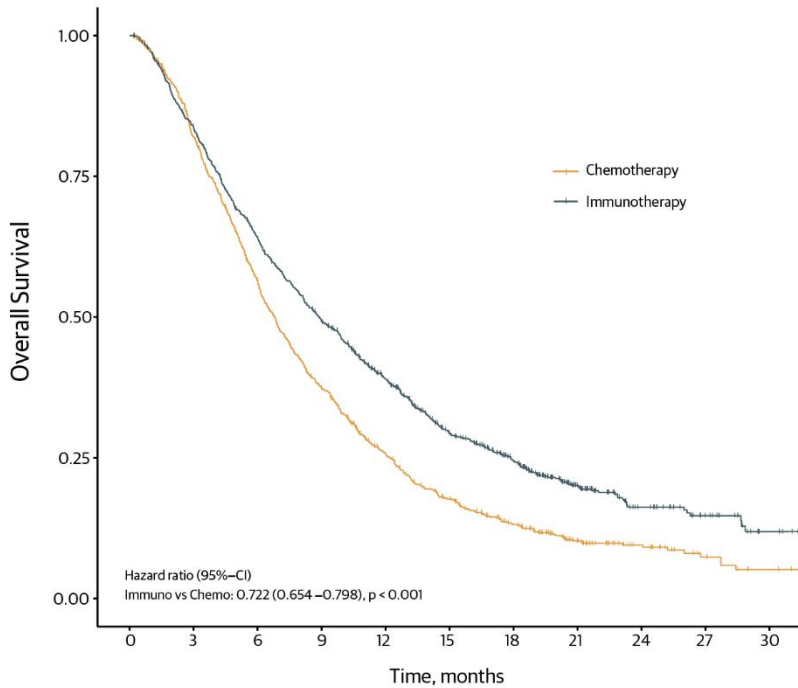

|     |     |     |     |     |     |     |    |    |    |   |
|-----|-----|-----|-----|-----|-----|-----|----|----|----|---|
| 983 | 788 | 534 | 351 | 227 | 149 | 95  | 50 | 25 | 11 | 4 |
| 987 | 816 | 623 | 475 | 350 | 237 | 166 | 87 | 43 | 24 | 7 |

7D

One-stage pooled analysis  
Progression Free Survival  
ESCORT, RATIONALE-302, KN-181, ATTRACTION-3, ORIENT-2

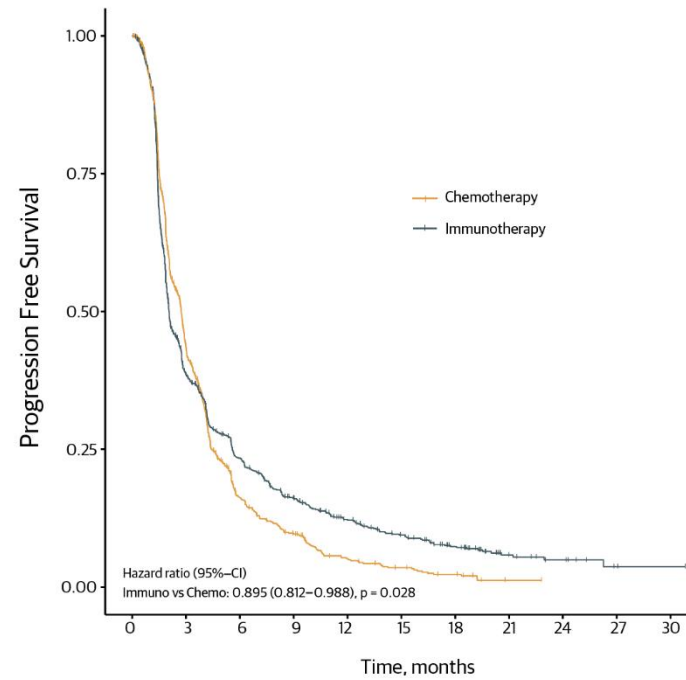

|     |     |     |     |    |    |    |    |   |   |   |
|-----|-----|-----|-----|----|----|----|----|---|---|---|
| 983 | 355 | 116 | 63  | 30 | 18 | 10 | 1  | 0 | 0 | 0 |
| 987 | 359 | 209 | 136 | 90 | 63 | 39 | 15 | 8 | 2 | 1 |

**7(A)** One stage meta-analyses of Overall Survival in first-line studies **(B)** One stage meta-analyses of Progression Free Survival in first-line studies **(C)** One stage meta-analyses of Overall Survival in second-line studies **(D)** One stage meta-analyses of Progression Free Survival in second-line studies
